# Supplementary material for: Oximinotrifluoromethylation of unactivated alkenes under ambient conditions
Source: Royal Society of Chemistry journal article supplement (doi:10.1039/c8cc05186k), 2018-01-01
Supplement: c8cc05186k1.pdf [file c8cc05186k1.pdf]

# Supplementary Information

## Oximinotrifluoromethylation of Unactivated Alkenes under Ambient Conditions

Na Wang,<sup>a,b,†</sup> Jian Wang,<sup>b,†</sup> Yu-Long Guo,<sup>b</sup> Lei Li,<sup>b</sup> Yan Sun,<sup>b</sup> Zhuang Li,<sup>b</sup> Hong-Xia Zhang,<sup>a</sup> Zhen Guo,<sup>a</sup> Zhong-Liang Li,<sup>\*c</sup> and Xin-Yuan Liu<sup>\*b</sup>

<sup>a</sup> College of Materials Science & Engineering, Key Laboratory of Interface Science and Engineering in Advanced Materials, Ministry of Education, Taiyuan University of Technology, Shanxi, 030024, China

<sup>b</sup> Department of Chemistry and Shenzhen Grubbs Institute, Southern University of Science and Technology, Shenzhen 518055, China.

<sup>c</sup> Academy for Advanced Interdisciplinary Studies, Southern University of Science and Technology, Shenzhen, 518055, China.

Email: lizl@sustc.edu.cn; liuxy3@sustc.edu.cn

### Table of Contents

|                                                                                        |    |
|----------------------------------------------------------------------------------------|----|
| General information.....                                                               | 2  |
| Scheme S1 and Scheme S2 .....                                                          | 3  |
| Experimental procedure for synthesis of substrates.....                                | 4  |
| General procedure for 1,2-trifluoromethyl-oximation of alkene <b>1</b> .....           | 16 |
| General Procedure for synthesis of fluoroalkylated oximes. ....                        | 24 |
| General procedure for ring expansion strategy for synthesis of medium-sized rings..... | 26 |
| Synthetic transformations .....                                                        | 29 |
| Large-scale synthesis .....                                                            | 30 |
| Control experiment with TEMPO as radical scavenger .....                               | 31 |
| NMR Spectra .....                                                                      | 32 |

**General information.**

All reactions were carried out under argon using Schlenk techniques. Reagents were purchased at the commercial quality and used without further purification. Analytical thin layer chromatography (TLC) was performed on precoated silica gel 60 GF254 plates. Flash column chromatography was performed using Tsingdao silica gel (60, particle size 0.040-0.063 mm). Visualization on TLC was achieved by use of UV light (254 nm),  $\text{KMnO}_4$  or iodine stain. NMR spectra were recorded on a Bruker DPX 400 spectrometer at 400/500 MHz for  $^1\text{H}$  NMR, 100/125 MHz for  $^{13}\text{C}$  NMR and 376 MHz for  $^{19}\text{F}$  NMR in  $\text{CDCl}_3$  with tetramethylsilane (TMS) as internal standard. The chemical shifts are expressed in ppm and coupling constants are given in Hz. Data for  $^1\text{H}$  NMR are recorded as follows: chemical shift (ppm), multiplicity (s, singlet; d, doublet; t, triplet; q, quarter; m, multiplet), coupling constant (Hz), integration. Data for  $^{13}\text{C}$  NMR are reported in terms of chemical shift ( $\delta$ , ppm).  $^{19}\text{F}$  NMR spectra were recorded on a Bruker DPX 400 MHz spectrometer ( $\text{CFCl}_3$  as an external reference (0 ppm)). Mass spectrometric data were obtained using Bruker Apex IV RTMS.

**Scheme S1 and Scheme S2**

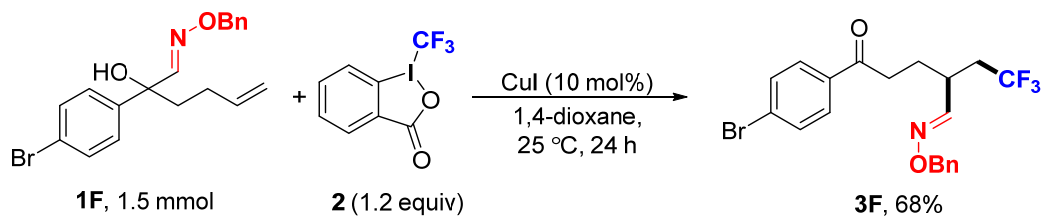

**Scheme S1** Large-scale synthesis.

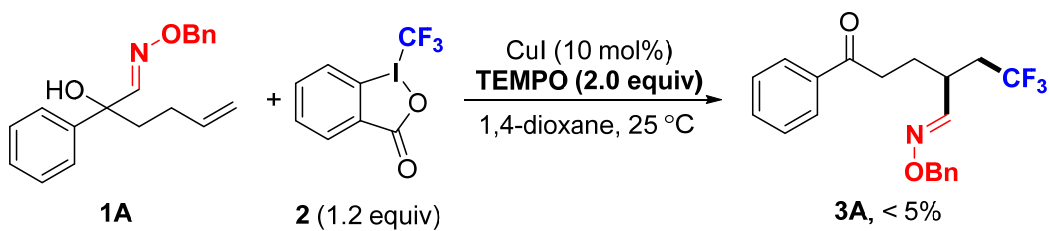

**Scheme S2** Control experiment.

## Experimental procedure for synthesis of substrates

### Procedure for synthesis of linear substrates

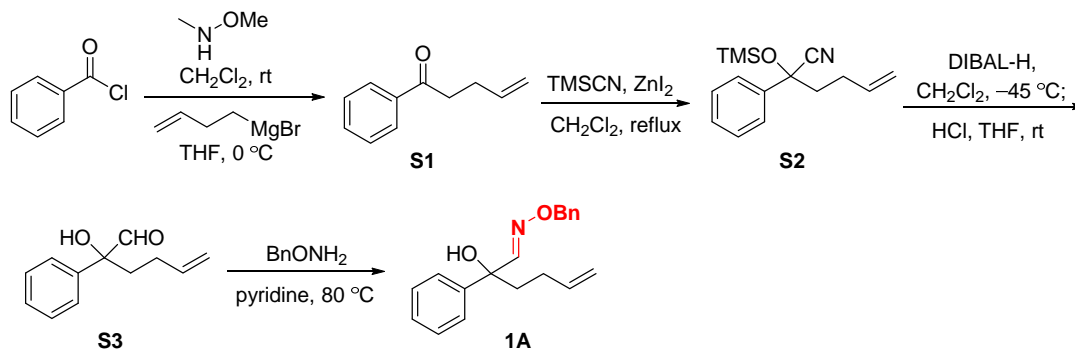

To a solution of *N,O*-dimethylhydroxylamine hydrochloride (5.9 g, 60 mmol) in anhydrous  $\text{CH}_2\text{Cl}_2$  (60 mL) were added  $\text{Et}_3\text{N}$  (16.8 mL, 120 mmol) and benzoyl chloride (7.0 mL, 30 mmol) at  $0^\circ\text{C}$ . The reaction mixture was stirred at room temperature for 1 h and quenched with saturated  $\text{NaHCO}_3$  (30 mL). Dichloromethane ( $3 \times 60$  mL) was added to extract the product from the aqueous layer. The combined organic layer was washed with HCl (1M, 30 mL) and brine (30 mL), dried over anhydrous  $\text{Na}_2\text{SO}_4$ , filtered and concentrated to afford the crude product (9.7 g). The crude product was dissolved in THF (15 mL) and added to a solution of prepared Grignard reagent (1M, 90 mL) in THF at  $0^\circ\text{C}$  dropwisely. The reaction mixture was stirred at that temperature for 30 min and quenched with saturated  $\text{NH}_4\text{Cl}$  (30 mL). Diethyl ether was used to extract the product from the aqueous layer ( $3 \times 60$  mL). The combined organic layer was washed with brine (30 mL), dried over anhydrous  $\text{Na}_2\text{SO}_4$ , filtered and concentrated to afford the crude product **S1** (7.9 g, 80%), which was applied to the next step without further purification.

A solution of **S1** (7.9 g, 49 mmol), TMSCN (6.8 mL, 52 mmol) and  $\text{ZnI}_2$  (0.80 g, 2.5 mmol) in anhydrous  $\text{CH}_2\text{Cl}_2$  (60 mL) were heated to reflux for 12 h and cooled down to room temperature. The solvent was removed to afford the crude product, which was purified by flash column chromatography to afford the product **S2** as a colorless oil (9.5 g, 76%). The product **S2** was dissolved in anhydrous  $\text{CH}_2\text{Cl}_2$  (50 mL). To this solution was added diisobutylaluminium hydride (DIBALH) (1M/hexane, 60 mL, 60 mmol) at  $-45^\circ\text{C}$ . The reaction mixture was stirred for 2 h and quenched with  $\text{H}_2\text{O}$  (2 mL) and potassium

sodium tartrate (1 M, 40 mL) with vigorously stirring. Dichloromethane was used to extract the product from the aqueous layer (3 × 50 mL). The combined organic layer was washed with brine (30 mL), dried over anhydrous Na<sub>2</sub>SO<sub>4</sub>, filtered and concentrated to afford the crude product (5.8 g, 78%), which was dissolved in THF (50 mL). To this solution was added HCl (3 M, 10 mL, 50 mmol) at room temperature and the reaction mixture was stirred for 1 h and quenched with H<sub>2</sub>O (10 mL). EtOAc was used to extract the product from the aqueous layer (3 × 40 mL). The combined organic layer was washed with brine (30 mL), dried over anhydrous Na<sub>2</sub>SO<sub>4</sub>, filtered and concentrated to afford the crude product, which was purified by flash column chromatography to afford the product **S3** (4.0 g, 75% yield) as a colorless oil.

A solution of **S3** (0.95 g, 5.0 mmol) and *O*-benzylhydroxylamine (1.2 g, 10 mmol) in pyridine (5 mL) was heated at 80 °C for 2 h and then cooled down to room temperature. The solvent was evaporated under reduced pressure. EtOAc (30 mL) was added to dissolve the crude product, which was washed with HCl (1 M, 10 mL) and brine (10 mL) sequentially. The organic layer was dried over anhydrous Na<sub>2</sub>SO<sub>4</sub>, filtered and concentrated to afford the crude product, which was purified by flash column chromatography to afford the product **1A** (1.2 g, 80% yield, 36% overall yield) as a colorless oil.

The procedure for synthesis of **1B-1O** is similar to that reported for synthesis of **1A**.

**(*E*)-2-hydroxy-2-phenylhex-5-enal O-benzyl oxime (1A)**

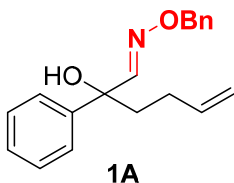

**1A:** <sup>1</sup>H NMR (400 MHz, CDCl<sub>3</sub>) δ 7.53 (s, 1H), 7.32 – 7.03 (m, 10H), 5.72 – 5.56 (m, 1H), 5.02 – 4.90 (m, 2H), 4.87 – 4.71 (m, 2H), 3.34 (s, 1H), 2.04 – 1.78 (m, 4H). <sup>13</sup>C NMR (100 MHz, CDCl<sub>3</sub>) δ 159.4, 143.3, 138.7, 137.9, 128.5, 128.4, 128.2, 128.0, 127.5,

126.2, 114.8, 78.0, 76.3, 36.7, 27.8. HRMS (ESI)  $m/z$  calcd. for  $C_{19}H_{22}O_2N$   $[M+H]^+$  296.1645, found 296.1641.

**(E)-2-hydroxy-2-(p-tolyl)hex-5-enal O-benzyl oxime (1B)**

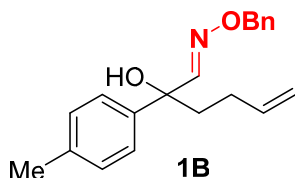

**1B:**  $^1H$  NMR (400 MHz,  $CDCl_3$ )  $\delta$  7.63 (s, 1H), 7.33 – 7.24 (m, 7H), 7.12 (d,  $J$  = 8.1 Hz, 2H), 5.83 – 5.61 (m, 1H), 5.11 – 4.99 (m, 2H), 4.98 – 4.82 (m, 2H), 3.39 (s, 1H), 2.29 (s, 3H), 2.15 – 1.83 (m, 4H).  $^{13}C$  NMR (101 MHz,  $CDCl_3$ )  $\delta$  153.8, 140.3, 138.3, 137.2, 137.0, 129.2, 128.5, 128.4, 128.1, 125.2, 114.8, 76.3, 75.5, 40.0, 27.7, 21.0. HRMS (ESI)  $m/z$  calcd. for  $C_{20}H_{24}O_2N$   $[M+H]^+$  310.1802, found 310.1798.

**(E)-2-hydroxy-2-(4-methoxyphenyl)hex-5-enal O-benzyl oxime (1C)**

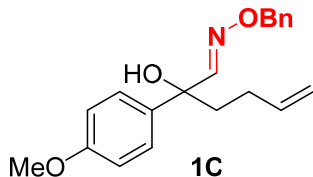

**1C:**  $^1H$  NMR (400 MHz,  $CDCl_3$ )  $\delta$  7.64 (s, 1H), 7.38 – 7.29 (m, 7H), 6.91 – 6.83 (m, 2H), 5.87 – 5.69 (m, 1H), 5.13 – 5.04 (m, 2H), 5.02 – 4.88 (m, 2H), 4.57 (s, 1H), 3.79 (s, 3H), 2.12 – 1.94 (m, 4H).  $^{13}C$  NMR (100 MHz,  $CDCl_3$ )  $\delta$  158.9, 153.8, 138.4, 137.2, 135.3, 128.6, 128.5, 128.2, 126.6, 114.8, 113.9, 76.5, 75.3, 55.4, 40.0, 27.8. HRMS (ESI)  $m/z$  calcd. for  $C_{20}H_{24}O_3N$   $[M+H]^+$  326.1751, found 326.1746.

**(E)-2-(4-fluorophenyl)-2-hydroxyhex-5-enal O-benzyl oxime (1D)**

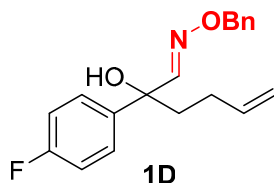

**1D:**  $^1\text{H}$  NMR (400 MHz,  $\text{CDCl}_3$ )  $\delta$  7.63 (s, 1H), 7.41 – 7.28 (m, 7H), 7.02 (t,  $J$  = 8.7 Hz, 2H), 5.83 – 5.70 (m, 1H), 5.14 – 5.04 (m, 2H), 5.00 – 4.90 (m, 2H), 3.41 (s, 1H), 2.12 – 1.91 (m, 4H).  $^{13}\text{C}$  NMR (100 MHz,  $\text{CDCl}_3$ )  $\delta$  162.1 (d,  $J$  = 245.8 Hz), 153.4, 139.01 (d,  $J$  = 3.0 Hz), 138.2, 137.1, 128.6, 128.5, 128.3, 127.13 (d,  $J$  = 8.1 Hz), 115.5, 115.16 (d,  $J$  = 22.7 Hz), 76.6, 75.4, 40.2, 27.7.  $^{19}\text{F}$  NMR (376 MHz,  $\text{CDCl}_3$ )  $\delta$  -115.4. HRMS (ESI)  $m/z$  calcd. for  $\text{C}_{19}\text{H}_{21}\text{O}_2\text{NF}$   $[\text{M}+\text{H}]^+$  314.1551, found 314.1548.

**(*E*)-2-(4-chlorophenyl)-2-hydroxyhex-5-enal O-benzyl oxime (1E)**

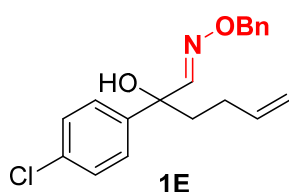

**1E:**  $^1\text{H}$  NMR (400 MHz,  $\text{CDCl}_3$ )  $\delta$  7.63 (s, 1H), 7.42 – 7.25 (m, 9H), 5.88 – 5.64 (m, 1H), 5.18 – 5.05 (m, 2H), 5.02 – 4.87 (m, 2H), 3.44 (s, 1H), 2.26 – 1.91 (m, 4H).  $^{13}\text{C}$  NMR (100 MHz,  $\text{CDCl}_3$ )  $\delta$  153.1, 141.8, 138.1, 137.0, 133.3, 128.7, 128.6, 128.5, 128.2, 126.8, 115.1, 76.6, 75.4, 40.1, 27.6. HRMS (ESI)  $m/z$  calcd. for  $\text{C}_{19}\text{H}_{21}\text{O}_2\text{NCl}$   $[\text{M}+\text{H}]^+$  330.1255, found 330.1251.

**(*E*)-2-(4-bromophenyl)-2-hydroxyhex-5-enal O-benzyl oxime (1F)**

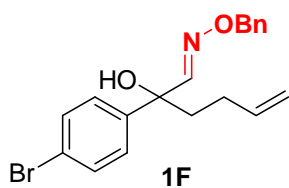

**1F:**  $^1\text{H}$  NMR (400 MHz,  $\text{CDCl}_3$ )  $\delta$  7.62 (s, 1H), 7.51 – 7.24 (m, 9H), 5.83 – 5.67 (m, 1H), 5.17 – 5.04 (m, 2H), 5.00 – 4.87 (m, 2H), 3.43 (s, 1H), 2.15 – 1.91 (m, 4H).  $^{13}\text{C}$  NMR (100 MHz,  $\text{CDCl}_3$ )  $\delta$  153.1, 142.3, 138.0, 137.0, 131.6, 128.5(4), 128.5(2), 128.2, 127.2, 121.5, 115.0, 76.5, 75.4, 40.0, 27.6. HRMS (ESI)  $m/z$  calcd. for  $\text{C}_{19}\text{H}_{21}\text{O}_2\text{NBr}$   $[\text{M}+\text{H}]^+$  374.0750, found 374.0746.

**(*E*)-2-(3-chlorophenyl)-2-hydroxyhex-5-enal O-benzyl oxime (1G)**

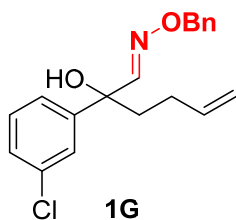

**1G:**  $^1\text{H}$  NMR (400 MHz,  $\text{CDCl}_3$ )  $\delta$  7.64 (s, 1H), 7.48 – 7.43 (m, 1H), 7.37 – 7.29 (m, 5H), 7.29 – 7.19 (m, 3H), 5.86 – 5.64 (m, 1H), 5.14 – 5.04 (m, 2H), 5.01 – 4.89 (m, 2H), 3.45 (s, 1H), 2.18 – 1.87 (m, 4H).  $^{13}\text{C}$  NMR (100 MHz,  $\text{CDCl}_3$ )  $\delta$  152.9, 145.5, 138.0, 137.0, 134.7, 129.9, 128.6, 128.5, 128.3, 127.7, 125.7, 123.5, 115.1, 76.7, 75.4, 40.1, 27.6. HRMS (ESI)  $m/z$  calcd. for  $\text{C}_{19}\text{H}_{21}\text{O}_2\text{NCl}$   $[\text{M}+\text{H}]^+$  330.1255, found 330.1251.

**(E)-2-(2-chlorophenyl)-2-hydroxyhex-5-enal O-benzyl oxime (1H)**

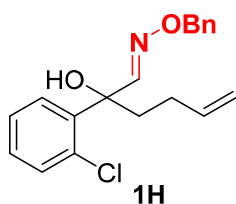

**1H:**  $^1\text{H}$  NMR (400 MHz,  $\text{CDCl}_3$ )  $\delta$  8.34 – 8.22 (m, 1H), 7.90 – 7.83 (m, 1H), 7.43 – 7.25 (m, 7H), 7.25 – 7.18 (m, 1H), 5.86 – 5.70 (m, 1H), 5.14 – 5.02 (m, 2H), 5.01 – 4.86 (m, 2H), 3.74 (s, 1H), 2.44 – 2.30 (m, 1H), 2.26 – 2.01 (m, 2H), 2.01 – 1.83 (m, 1H).  $^{13}\text{C}$  NMR (100 MHz,  $\text{CDCl}_3$ )  $\delta$  152.9, 140.8, 138.3, 137.3, 131.2, 130.9, 129.2, 128.6, 128.6, 128.3, 127.3, 115.0, 76.6, 75.8, 37.7, 28.0. HRMS (ESI)  $m/z$  calcd. for  $\text{C}_{19}\text{H}_{21}\text{O}_2\text{NCl}$   $[\text{M}+\text{H}]^+$  330.1255, found 330.1253.

**(E)-2-hydroxy-2-(naphthalen-1-yl)hex-5-enal O-benzyl oxime (1I)**

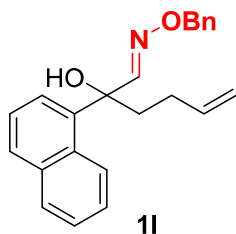

**1I:**  $^1\text{H}$  NMR (400 MHz,  $\text{CDCl}_3$ )  $\delta$  8.42 – 8.26 (m, 1H), 7.94 – 7.89 (m, 1H), 7.84 (d,  $J$  = 8.0 Hz, 1H), 7.78 (d,  $J$  = 8.0 Hz, 1H), 7.70 – 7.63 (m, 1H), 7.50 – 7.27 (m, 8H), 5.86 – 5.66 (m, 1H), 5.18 – 5.06 (m, 2H), 5.00 – 4.78 (m, 2H), 3.26 (brs, 1H), 2.58 – 2.45 (m, 1H), 2.40 – 2.22 (m, 1H), 2.20 – 1.94 (m, 2H).  $^{13}\text{C}$  NMR (100 MHz,  $\text{CDCl}_3$ )  $\delta$  154.3, 138.4, 138.2, 137.5, 134.8, 130.5, 129.3(3), 129.3(0), 128.6, 128.5, 128.1, 125.9, 125.8, 125.4, 125.0, 124.0, 114.9, 76.6, 76.5, 38.8, 28.1. HRMS (ESI)  $m/z$  calcd. for  $\text{C}_{23}\text{H}_{24}\text{O}_2\text{N}$   $[\text{M}+\text{H}]^+$  346.1801, found 346.1796.

**(*E*)-2-(furan-2-yl)-2-hydroxyhex-5-enal O-benzyl oxime (1J)**

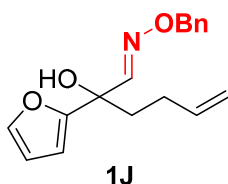

**1J:**  $^1\text{H}$  NMR (400 MHz,  $\text{CDCl}_3$ )  $\delta$  7.63 (s, 1H), 7.41 – 7.23 (m, 6H), 6.41 – 6.15 (m, 2H), 5.90 – 5.69 (m, 1H), 5.11 (s, 2H), 5.03 – 4.88 (m, 2H), 3.53 (s, 1H), 2.26 – 1.89 (m, 4H).  $^{13}\text{C}$  NMR (100 MHz,  $\text{CDCl}_3$ )  $\delta$  155.4, 151.0, 142.5, 138.0, 137.0, 128.5, 128.5, 128.2, 115.0, 110.4, 106.4, 76.6, 72.8, 37.5, 27.5. HRMS (ESI)  $m/z$  calcd. for  $\text{C}_{17}\text{H}_{20}\text{O}_3\text{N}$   $[\text{M}+\text{H}]^+$  286.1438, found 286.1437.

**(*E*)-2-hydroxy-2-(thiophen-2-yl)hex-5-enal O-benzyl oxime (1K)**

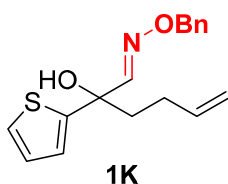

**1K:**  $^1\text{H}$  NMR (400 MHz,  $\text{CDCl}_3$ )  $\delta$  7.67 (s, 1H), 7.46 – 7.31 (m, 5H), 7.28 (dd,  $J$  = 5.1, 1.2 Hz, 1H), 7.01 (dd,  $J$  = 5.0, 3.6 Hz, 1H), 6.94 (dd,  $J$  = 3.6, 1.1 Hz, 1H), 5.91 – 5.74 (m, 1H), 5.21 – 5.10 (m, 2H), 5.08 – 4.94 (m, 2H), 3.80 (s, 1H), 2.27 – 1.99 (m, 4H).  $^{13}\text{C}$  NMR (100 MHz,  $\text{CDCl}_3$ )  $\delta$  152.4, 148.6, 138.0, 137.0, 128.6, 128.5, 128.2, 127.2, 125.0, 123.3, 115.1, 76.7, 74.7, 40.8, 27.8. HRMS (ESI)  $m/z$  calcd. for  $\text{C}_{17}\text{H}_{19}\text{O}_2\text{NNaS}$   $[\text{M}+\text{Na}]^+$  324.1029, found 324.1024.

**(*E*)-2-hydroxy-2-phenethylhex-5-enal O-benzyl oxime (1L)**

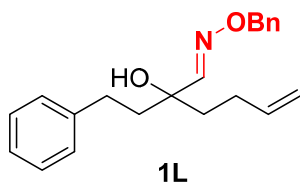

**1L:**  $^1\text{H}$  NMR (400 MHz,  $\text{CDCl}_3$ )  $\delta$  7.43 (s, 1H), 7.39 – 7.28 (m, 5H), 7.26 (d,  $J = 7.3$  Hz, 2H), 7.21 – 7.17 (m, 1H), 7.16 – 7.11 (m, 2H), 5.85 – 5.72 (m, 1H), 5.12 (s, 2H), 5.02 – 4.90 (m, 2H), 3.02 (s, 1H), 2.77 – 2.66 (m, 1H), 2.56 – 2.44 (m, 1H), 2.23 – 2.11 (m, 1H), 2.05 – 1.90 (m, 2H), 1.88 – 1.72 (m, 2H), 1.72 – 1.61 (m, 1H).  $^{13}\text{C}$  NMR (100 MHz,  $\text{CDCl}_3$ )  $\delta$  153.7, 142.1, 138.4, 137.3, 128.6(3), 128.6(0), 128.5, 128.2, 126.0, 115.0, 75.7, 74.3, 41.7, 39.1, 29.8, 27.8. HRMS (ESI)  $m/z$  calcd. for  $\text{C}_{21}\text{H}_{26}\text{O}_2\text{N}$   $[\text{M}+\text{H}]^+$  324.1958, found 324.1951.

**(*E*)-3-hydroxy-3-phenylhept-6-en-2-one O-benzyl oxime (1M)**

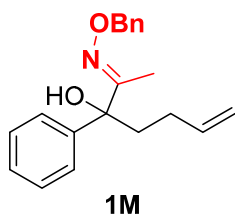

**1M:**  $^1\text{H}$  NMR (400 MHz,  $\text{CDCl}_3$ )  $\delta$  7.63 (s, 1H), 7.33 – 7.24 (m, 7H), 7.12 (d,  $J = 8.1$  Hz, 2H), 5.83 – 5.61 (m, 1H), 5.11 – 4.99 (m, 2H), 4.98 – 4.82 (m, 2H), 3.39 (s, 1H), 2.29 (s, 3H), 2.15 – 1.83 (m, 4H).  $^{13}\text{C}$  NMR (100 MHz,  $\text{CDCl}_3$ )  $\delta$  159.4, 143.3, 138.7, 137.9, 128.5, 128.4, 128.2, 128.0, 127.5, 126.2, 114.8, 78.0, 76.3, 36.7, 27.9, 11.7. HRMS (ESI)  $m/z$  calcd. for  $\text{C}_{20}\text{H}_{24}\text{O}_2\text{N}$   $[\text{M}+\text{H}]^+$  310.1802, found 310.1799.

**(*E*)-3-hydroxy-3-methylhept-6-en-2-one O-benzyl oxime (1N)**

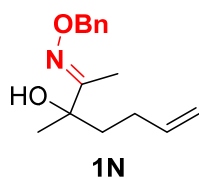

**1N:**  $^1\text{H}$  NMR (400 MHz,  $\text{CDCl}_3$ )  $\delta$  7.35 – 7.24 (m, 5H), 5.83 – 5.69 (m, 1H), 5.10 (s, 2H), 5.00 – 4.86 (m, 2H), 3.82 (s, 1H), 2.15 – 2.03 (m, 1H), 1.83 (s, 3H), 1.81 – 1.57 (m, 3H), 1.31 (s, 3H).  $^{13}\text{C}$  NMR (100 MHz,  $\text{CDCl}_3$ )  $\delta$  160.2, 138.5, 137.8, 128.4, 128.1, 127.9, 114.5, 76.1, 74.4, 39.1, 27.9, 27.0, 11.0. HRMS (ESI)  $m/z$  calcd. for  $\text{C}_{15}\text{H}_{22}\text{O}_2\text{N}$   $[\text{M}+\text{H}]^+$  248.1645, found 248.1643.

**(*E*)-2-hydroxy-2-phenylhex-5-enal O-(4-methoxybenzyl) oxime (1O)**

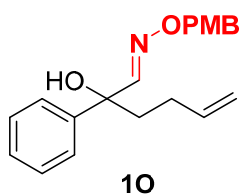

**1O:**  $^1\text{H}$  NMR (400 MHz,  $\text{CDCl}_3$ )  $\delta$  7.62 (s, 1H), 7.43 – 7.36 (m, 2H), 7.33 – 7.27 (m, 2H), 7.27 – 7.19 (m, 3H), 6.87 – 6.80 (m, 2H), 5.82 – 5.67 (m, 1H), 5.03 – 4.97 (m, 2H), 4.97 – 4.83 (m, 2H), 3.71 (s, 3H), 3.51 (s, 1H), 2.11 – 1.93 (m, 4H).  $^{13}\text{C}$  NMR (101 MHz,  $\text{CDCl}_3$ )  $\delta$  159.5, 153.4, 143.2, 130.2, 129.1, 128.4, 127.3, 125.2, 114.7, 113.8, 76.1, 75.5, 55.2, 40.0, 27.6. HRMS (ESI)  $m/z$  calcd. for  $\text{C}_{20}\text{H}_{24}\text{O}_3\text{N}$   $[\text{M}+\text{H}]^+$  326.1750, found 326.1750.

**(*E*)-2-hydroxy-2-phenylhept-6-enal O-benzyl oxime (1P)**

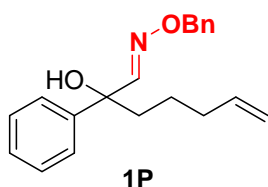

**1P:**  $^1\text{H}$  NMR (400 MHz,  $\text{CDCl}_3$ )  $\delta$  7.65 (s, 1H), 7.41 – 7.36 (m, 2H), 7.33 – 7.15 (m, 8H), 5.80 – 5.61 (m, 1H), 5.12 – 5.01 (m, 2H), 4.99 – 4.85 (m, 2H), 3.40 (s, 1H), 2.05 – 1.82 (m, 4H), 1.37 (m, 2H).  $^{13}\text{C}$  NMR (100 MHz,  $\text{CDCl}_3$ )  $\delta$  153.7, 143.4, 138.4, 137.1, 128.4, 128.4, 128.3, 128.0, 127.2, 125.2, 114.8, 76.3, 75.6, 40.3, 33.7, 22.4. HRMS (ESI)  $m/z$  calcd. for  $\text{C}_{20}\text{H}_{24}\text{O}_3\text{N}$   $[\text{M}+\text{H}]^+$  310.1801, found 310.1798.

**Procedure for synthesis of benzyl-protected cyclic oximes 9A and 9D**

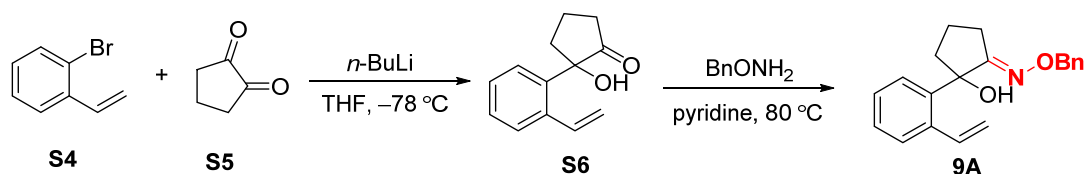

To a solution of **S4** (2.7 g, 15 mmol) in anhydrous THF (20 mL) was added *n*-BuLi (2.2 M/hexane, 7.0 mL, 15 mmol) at  $-78\text{ }^\circ\text{C}$ . The reaction solution was stirred for 1 h, followed by addition of **S5** (0.75 g, 7.5 mmol). The reaction solution was warmed up to room temperature and stirred for 12 h and quenched with water (20 mL). EtOAc was used to extract the product from the aqueous layer ( $3 \times 40\text{ mL}$ ). The combined organic layer was washed with brine (20 mL), dried over anhydrous  $\text{Na}_2\text{SO}_4$ , filtered and concentrated to afford the crude product, which was purified by flash column chromatography to afford the product **S6** (0.38 g, 25%) as a colorless oil.

A solution of **S6** (0.38 g, 1.9 mmol) and *O*-benzylhydroxylamine (0.46 g, 3.8 mmol) in pyridine (3 mL) was heated at  $80\text{ }^\circ\text{C}$  for 2 h and then cooled down to room temperature. The solvent was evaporated under reduced pressure. EtOAc (20 mL) was added to dissolve the crude product, which was washed with HCl (1 M, 10 mL) and brine (10 mL) sequentially. The organic layer was dried over anhydrous  $\text{Na}_2\text{SO}_4$ , filtered and concentrated to afford the crude product, which was purified by flash column chromatography to afford the product **9A** (0.29 g, 50% yield) as a colorless oil.

The procedure for synthesis of **9D** is similar to that of **9A**.

#### Procedure for synthesis of benzyl-protected cyclic oximes **9B** and **9C**

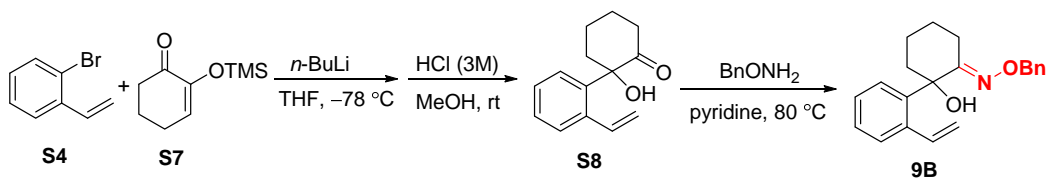

To a solution of **S4** (1.9 g, 10 mmol) in anhydrous THF (20 mL) was added *n*-BuLi (2.2 M/hexane, 4.5 mL, 10 mmol) at  $-78\text{ }^\circ\text{C}$ . The reaction solution was stirred for 1 h, followed by addition of **S7** (1.8 g, 10 mmol). The reaction solution was warmed up to

room temperature and stirred for 2 h and quenched with water (20 mL). EtOAc was used to extract the product from the aqueous layer (3 × 20 mL). The combined organic layer was washed with brine (10 mL), dried over anhydrous Na<sub>2</sub>SO<sub>4</sub>, filtered and concentrated to afford the crude product, which was dissolved in MeOH (10 mL). 3M HCl (4 mL) was added to the reaction mixture. The mixture was stirred for 10 min and diluted with water (15 mL). Dichloromethane was used to extract the product from the aqueous layer (3 × 30 mL). The combined organic layer was washed with brine (10 mL), dried over anhydrous Na<sub>2</sub>SO<sub>4</sub>, filtered and concentrated to afford the crude product, which was purified by flash column chromatography to afford the product **S8** (0.95 g, 44%) as a colorless oil.

A solution of **S8** (0.95 g, 4.4 mmol) and *O*-benzylhydroxylamine (1.2 g, 10 mmol) in pyridine (5 mL) was heated at 80 °C for 2 h and then cooled down to room temperature. The solvent was evaporated under reduced pressure. EtOAc (30 mL) was added to dissolve the crude product, which was washed with HCl (1 M, 10 mL) and brine (10 mL) sequentially. The organic layer was dried over anhydrous Na<sub>2</sub>SO<sub>4</sub>, filtered and concentrated to afford the crude product, which was purified by flash column chromatography to afford the product **9B** (0.65 g, 45% yield) as a colorless oil.

The procedure for synthesis of **9C** is similar to that of **9B**.

**(*E*)-2-hydroxy-2-(2-vinylphenyl)cyclopentan-1-one O-benzyl oxime (9A)**

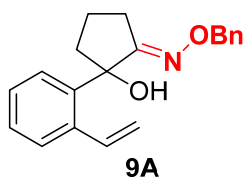

**9A:** <sup>1</sup>H NMR (400 MHz, CDCl<sub>3</sub>) δ 7.57 – 7.46 (m, 1H), 7.34 – 7.10 (m, 9H), 5.52 (d, *J* = 17.4 Hz, 1H), 5.22 (d, *J* = 11.0 Hz, 1H), 5.09 (s, 2H), 2.91 – 2.72 (m, 2H), 2.58 – 2.44 (m, 1H), 2.38 – 2.27 (m, 1H), 2.08 – 1.97 (m, 1H), 1.93 – 1.80 (m, 1H), 1.64 – 1.49 (m, 1H). <sup>13</sup>C NMR (100 MHz, CDCl<sub>3</sub>) δ 169.0, 140.8, 138.1, 137.1(4), 137.1(2), 128.4, 128.3, 127.9, 127.9, 127.7, 127.2, 126.8, 115.4, 82.4, 76.3, 41.1, 27.5, 20.6. HRMS (ESI) *m/z* calcd. for C<sub>20</sub>H<sub>22</sub>O<sub>2</sub>N [M+H]<sup>+</sup> 308.1645, found 308.1640.

**(*E*)-2-hydroxy-2-(2-vinylphenyl)cyclohexan-1-one O-benzyl oxime (9B)**

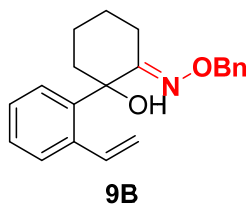

**9B:**  $^1\text{H}$  NMR (400 MHz,  $\text{CDCl}_3$ )  $\delta$  7.40 – 7.34 (m, 2H), 7.32 – 7.07 (m, 8H), 5.35 (dd,  $J$  = 17.3, 1.5 Hz, 1H), 5.02 (s, 2H), 4.97 (dd,  $J$  = 10.9, 1.5 Hz, 1H), 3.93 (s, 1H), 3.01 – 2.87 (m, 1H), 2.78 – 2.65 (m, 1H), 2.07 (ddd,  $J$  = 14.5, 9.5, 5.1 Hz, 1H), 1.78 – 1.55 (m, 3H), 1.54 – 1.34 (m, 2H).  $^{13}\text{C}$  NMR (100 MHz,  $\text{CDCl}_3$ )  $\delta$  162.9, 139.4, 138.4, 137.9, 137.7, 128.4, 128.3, 128.2, 127.7, 127.2, 126.7, 114.9, 76.5, 75.9, 41.1, 25.5, 24.2, 22.2. HRMS (ESI)  $m/z$  calcd. for  $\text{C}_{21}\text{H}_{24}\text{O}_2\text{N}$   $[\text{M}+\text{H}]^+$  322.1802, found 322.1799.

**(E)-2-hydroxy-2-(2-vinylphenyl)cycloheptan-1-one O-benzyl oxime (9C)**

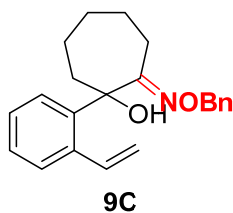

**9C:**  $^1\text{H}$  NMR (400 MHz,  $\text{CDCl}_3$ )  $\delta$  7.85 – 7.73 (m, 1H), 7.56 (d,  $J$  = 7.6 Hz, 1H), 7.50 – 7.36 (m, 5H), 7.36 – 7.27 (m, 1H), 7.22 (t,  $J$  = 7.5 Hz, 1H), 6.98 (d,  $J$  = 7.7 Hz, 1H), 5.58 (dd,  $J$  = 17.5, 1.3 Hz, 1H), 5.29 (dd,  $J$  = 11.0, 1.4 Hz, 1H), 5.26 (s, 2H), 4.56 (s, 1H), 3.34 – 3.27 (m, 1H), 2.77 – 2.65 (m, 1H), 2.05 – 1.94 (m, 2H), 1.91 – 1.63 (m, 4H), 1.57 (dd,  $J$  = 23.7, 11.6 Hz, 1H), 1.45 – 1.30 (m, 1H).  $^{13}\text{C}$  NMR (100 MHz,  $\text{CDCl}_3$ )  $\delta$  165.3, 142.3, 138.7, 138.2, 137.8, 128.9, 128.4, 128.2, 127.9, 127.6, 127.0, 126.1, 114.9, 80.3, 76.3, 40.7, 30.2, 28.2, 26.1, 23.4. HRMS (ESI)  $m/z$  calcd. for  $\text{C}_{22}\text{H}_{26}\text{O}_2\text{N}$   $[\text{M}+\text{H}]^+$  336.1958, found 336.1953.

**(E)-2-(2-allylphenyl)-2-hydroxycyclopentan-1-one O-benzyl oxime (9D)**

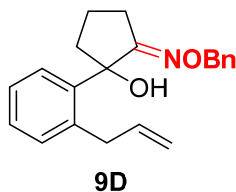

**9D:**  $^1\text{H}$  NMR (400 MHz,  $\text{CDCl}_3$ )  $\delta$  7.40 – 7.15 (m, 8H), 7.12 – 7.05 (m, 1H), 6.03 – 5.86 (m, 1H), 5.09 (s, 2H), 5.06 – 4.93 (m, 2H), 3.51 – 3.45 (m, 2H), 2.88 – 2.75 (m, 1H), 2.63 – 2.47 (m, 1H), 2.27 – 2.16 (m, 1H), 2.11 – 1.99 (m, 1H), 1.98 – 1.84 (m, 1H), 1.68 – 1.50 (m, 1H).  $^{13}\text{C}$  NMR (100 MHz,  $\text{CDCl}_3$ )  $\delta$  169.3, 141.8, 138.5, 138.1, 138.1, 131.6, 128.5, 128.3, 127.9, 127.7, 127.0, 125.6, 115.8, 82.6, 76.3, 41.4, 37.9, 27.5, 20.6. HRMS (ESI)  $m/z$  calcd. for  $\text{C}_{21}\text{H}_{24}\text{O}_2\text{N}$   $[\text{M}+\text{H}]^+$  322.1802, found 322.1800.

### General procedure for 1,2-trifluoromethyl-oximation of alkene 1

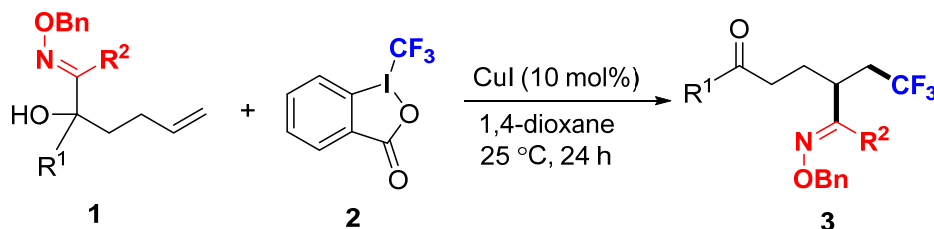

In an oven-dried 10 mL Schlenk tube were added **1** (0.20 mmol), CuI (4 mg, 0.02 mmol) and Togni's reagent **2** (75 mg, 0.24 mmol). The tube was vacuumed and back-filled with argon three times and then added with 1,4-dioxane (2 mL). The reaction mixture was stirred at 25 °C for 24 h. The solvent was removed under reduced pressure to afford the crude product, which was purified by flash column chromatography to afford the product **3**.

### (*E*)-5-oxo-5-phenyl-2-(2,2,2-trifluoroethyl)pentanal *O*-benzyl oxime (**3A**)

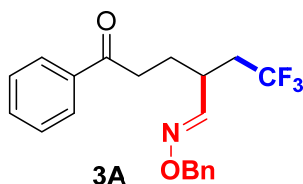

**3A**: (81% yield). <sup>1</sup>H NMR (400 MHz, CDCl<sub>3</sub>) δ 7.86 (d, *J* = 7.7 Hz, 2H), 7.56 (t, *J* = 7.4 Hz, 1H), 7.44 (t, *J* = 7.5 Hz, 2H), 7.35 – 7.22 (m, 6H), 5.06 – 5.01 (m, 2H), 3.00 – 2.85 (m, 2H), 2.79 – 2.68 (m, 1H), 2.46 – 2.19 (m, 2H), 2.08 – 1.97 (m, 1H), 1.97 – 1.83 (m, 1H). <sup>13</sup>C NMR (100 MHz, CDCl<sub>3</sub>) δ 198.4, 151.3, 137.7, 136.7, 133.3, 128.7, 128.4, 128.2, 128.1, 127.9, 126.3 (q, *J* = 277.3 Hz), 75.8, 37.0 (q, *J* = 28.1 Hz), 35.3, 34.0 (q, *J* = 2.4 Hz), 26.5. <sup>19</sup>F NMR (376 MHz, CDCl<sub>3</sub>) δ -63.5. HRMS (ESI) *m/z* calcd. For C<sub>20</sub>H<sub>21</sub>O<sub>2</sub>NF<sub>3</sub> [M+H]<sup>+</sup> 364.1519, found 364.1516.

### (*E*)-5-oxo-5-(*p*-tolyl)-2-(2,2,2-trifluoroethyl)pentanal *O*-benzyl oxime (**3B**)

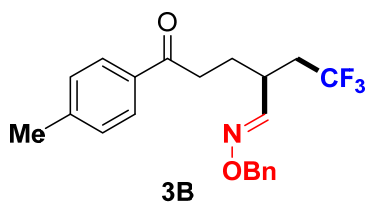

**3B:** (60% yield).  $^1\text{H}$  NMR (400 MHz,  $\text{CDCl}_3$ )  $\delta$  7.77 (d,  $J = 8.2$  Hz, 2H), 7.36 – 7.21 (m, 7H), 5.06 – 5.04 (m, 2H), 3.01 – 2.82 (m, 2H), 2.79 – 2.68 (m, 1H), 2.41 (s, 3H), 2.40 – 2.20 (m, 2H), 2.07 – 1.97 (m, 1H), 1.95 – 1.84 (m, 1H).  $^{13}\text{C}$  NMR (101 MHz,  $\text{CDCl}_3$ )  $\delta$  198.7, 151.4, 144.1, 137.6, 134.3, 129.4, 128.5, 128.2(4), 128.2(3), 127.9, 126.3 (q,  $J = 277.3$  Hz), 75.9, 37.1 (q,  $J = 28.1$  Hz), 35.2, 34.1 (q,  $J = 2.4$  Hz), 29.8, 26.6, 21.8.  $^{19}\text{F}$  NMR (376 MHz,  $\text{CDCl}_3$ )  $\delta$  -63.6. HRMS (ESI)  $m/z$  calcd. for  $\text{C}_{21}\text{H}_{23}\text{O}_2\text{NF}_3$   $[\text{M}+\text{H}]^+$  378.1675, found 378.1672.

**(E)-5-(4-methoxyphenyl)-5-oxo-2-(2,2,2-trifluoroethyl)pentanal O-benzyl oxime (3C)**

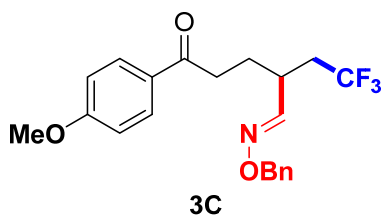

**3C:** (63% yield).  $^1\text{H}$  NMR (400 MHz,  $\text{CDCl}_3$ )  $\delta$  7.84 (d,  $J = 8.9$  Hz, 2H), 7.37 – 7.19 (m, 6H), 6.91 (d,  $J = 8.9$  Hz, 2H), 5.06 – 5.00 (m, 2H), 3.87 (s, 3H), 2.94 – 2.79 (m, 2H), 2.79 – 2.66 (m, 1H), 2.45 – 2.16 (m, 2H), 2.06 – 1.96 (m, 1H), 1.93 – 1.80 (m, 1H).  $^{13}\text{C}$  NMR (101 MHz,  $\text{CDCl}_3$ )  $\delta$  197.5, 163.6, 151.4, 137.7, 126.3 (q,  $J = 275.4$  Hz), 130.4, 129.9, 128.5, 128.2, 127.9, 113.8, 75.9, 55.6, 37.1 (q,  $J = 28.1$  Hz), 34.9 (q,  $J = 2.4$  Hz), 26.8.  $^{19}\text{F}$  NMR (376 MHz,  $\text{CDCl}_3$ )  $\delta$  -63.5. HRMS (ESI)  $m/z$  calcd. for  $\text{C}_{21}\text{H}_{23}\text{O}_3\text{NF}_3$   $[\text{M}+\text{H}]^+$  394.1624, found 394.1620.

**(E)-5-(4-fluorophenyl)-5-oxo-2-(2,2,2-trifluoroethyl)pentanal O-benzyl oxime (3D)**

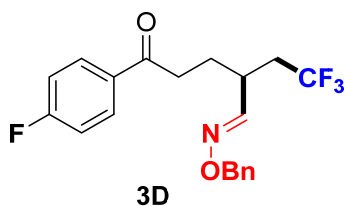

**3D:** (70% yield).  $^1\text{H}$  NMR (400 MHz,  $\text{CDCl}_3$ )  $\delta$  7.93 – 7.86 (m, 2H), 7.41 – 7.29 (m, 6H), 7.14 (t,  $J$  = 8.6 Hz, 2H), 5.10 – 5.01 (m, 2H), 2.96 – 2.88 (m, 2H), 2.81 – 2.70 (m, 1H), 2.49 – 2.23 (m, 2H), 2.12 – 2.01 (m, 1H), 1.98 – 1.86 (m, 1H).  $^{13}\text{C}$  NMR (101 MHz,  $\text{CDCl}_3$ )  $\delta$  197.4, 165.9 (d,  $J$  = 254.8 Hz), 151.3, 137.7, 133.2 (d,  $J$  = 3.0 Hz), 130.8 (d,  $J$  = 9.2 Hz), 128.5, 128.2, 128.0, 126.3 (q,  $J$  = 277.4 Hz), 115.8 (d,  $J$  = 21.9 Hz), 75.9, 37.2 (q,  $J$  = 28.0 Hz), 35.3, 34.1 (q,  $J$  = 2.6 Hz), 26.5.  $^{19}\text{F}$  NMR (376 MHz,  $\text{CDCl}_3$ )  $\delta$  -63.6, -105.1. HRMS (ESI)  $m/z$  calcd. For  $\text{C}_{20}\text{H}_{20}\text{O}_2\text{NF}_4$   $[\text{M}+\text{H}]^+$  382.1424, found 382.1423.

**(E)-5-(4-chlorophenyl)-5-oxo-2-(2,2,2-trifluoroethyl)pentanal O-benzyl oxime (3E)**

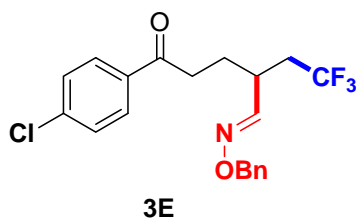

**3E:** (71% yield).  $^1\text{H}$  NMR (400 MHz,  $\text{CDCl}_3$ )  $\delta$  7.80 – 7.73 (m, 2H), 7.43 – 7.39 (m, 2H), 7.34 – 7.24 (m, 6H), 5.08 – 4.99 (m, 2H), 2.91 – 2.84 (m, 2H), 2.79 – 2.68 (m, 1H), 2.44 – 2.20 (m, 2H), 2.07 – 1.96 (m, 1H), 1.93 – 1.81 (m, 1H).  $^{13}\text{C}$  NMR (101 MHz,  $\text{CDCl}_3$ )  $\delta$  197.7, 151.2, 139.7, 137.7, 135.1, 129.5, 129.0, 128.5, 128.2, 127.9, 126.3 (q,  $J$  = 274.6 Hz), 75.9, 37.1 (q,  $J$  = 28.3 Hz), 35.3, 34.0 (q,  $J$  = 2.5 Hz), 26.4.  $^{19}\text{F}$  NMR (376 MHz,  $\text{CDCl}_3$ )  $\delta$  -63.5. HRMS (ESI)  $m/z$  calcd. For  $\text{C}_{20}\text{H}_{20}\text{O}_2\text{NClF}_3$   $[\text{M}+\text{H}]^+$  398.1129, found 398.1129.

**(E)-5-(4-bromophenyl)-5-oxo-2-(2,2,2-trifluoroethyl)pentanal O-benzyl oxime (3F)**

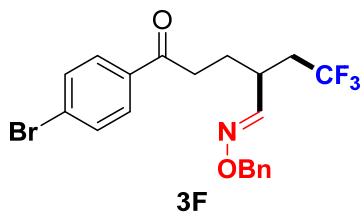

**3F**: (70% yield).  $^1\text{H}$  NMR (400 MHz,  $\text{CDCl}_3$ )  $\delta$  7.92 – 7.82 (m, 2H), 7.57 (t,  $J = 7.4$  Hz, 1H), 7.45 (t,  $J = 7.7$  Hz, 2H), 7.36 (dd,  $J = 7.2, 1.2$  Hz, 1H), 7.33 – 7.24 (m, 5H), 5.07 – 4.99 (m, 2H), 2.98 – 2.91 (m, 2H), 2.91 – 2.82 (m, 1H), 2.48 – 2.14 (m, 2H), 2.11 – 2.00 (m, 1H), 2.00 – 1.88 (m, 1H).  $^{13}\text{C}$  NMR (101 MHz,  $\text{CDCl}_3$ )  $\delta$  198.0, 151.2, 137.7, 135.5, 132.0, 129.6, 128.5, 128.5, 128.3, 128.0, 126.3 (q,  $J = 275.6$  Hz), 75.9, 37.2 (q,  $J = 28.2$  Hz), 35.3, 34.1 (q,  $J = 2.3$  Hz), 26.4.  $^{19}\text{F}$  NMR (376 MHz,  $\text{CDCl}_3$ )  $\delta$  -63.6. HRMS (ESI)  $m/z$  calcd. For  $\text{C}_{20}\text{H}_{20}\text{O}_2\text{NBrF}_3$   $[\text{M}+\text{H}]^+$  442.0624, found 442.0626.

**(*E*)-5-(3-chlorophenyl)-5-oxo-2-(2,2,2-trifluoroethyl)pentanal O-benzyl oxime (3G)**

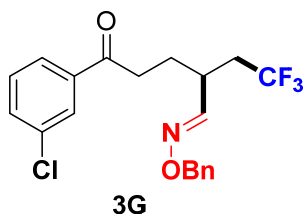

**3G**: (84% yield).  $^1\text{H}$  NMR (400 MHz,  $\text{CDCl}_3$ )  $\delta$  7.85 (s, 1H), 7.72 (d,  $J = 7.8$  Hz, 1H), 7.55 (d,  $J = 8.0$  Hz, 1H), 7.39 (t,  $J = 7.9$  Hz, 1H), 7.36 – 7.21 (m, 6H), 5.10 – 4.98 (m, 2H), 2.96 – 2.81 (m, 2H), 2.79 – 2.66 (m, 1H), 2.46 – 2.18 (m, 2H), 2.09 – 1.97 (m, 1H), 1.96 – 1.83 (m, 1H).  $^{13}\text{C}$  NMR (101 MHz,  $\text{CDCl}_3$ )  $\delta$  197.7, 151.2, 138.3, 137.6, 135.1, 133.2, 130.1, 128.5, 128.3, 128.2, 128.0, 126.3 (q,  $J = 277.3$  Hz), 126.2, 75.9, 37.2 (q,  $J = 28.3$  Hz), 35.4, 34.0 (q,  $J = 2.5$  Hz), 26.3.  $^{19}\text{F}$  NMR (376 MHz,  $\text{CDCl}_3$ )  $\delta$  -63.6. HRMS (ESI)  $m/z$  calcd. For  $\text{C}_{20}\text{H}_{20}\text{O}_2\text{NClF}_3$   $[\text{M}+\text{H}]^+$  398.1129, found 398.1130.

**(*E*)-5-(2-chlorophenyl)-5-oxo-2-(2,2,2-trifluoroethyl)pentanal O-benzyl oxime (3H)**

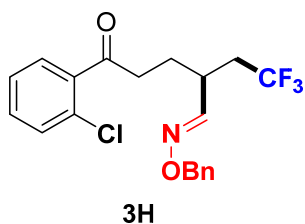

**3H:** (71% yield).  $^1\text{H}$  NMR (400 MHz,  $\text{CDCl}_3$ )  $\delta$  7.44 – 7.35 (m, 3H), 7.35 – 7.19 (m, 7H), 5.09 – 4.99 (m, 2H), 2.91 (t,  $J$  = 7.4 Hz, 2H), 2.79 – 2.67 (m, 1H), 2.45 – 2.17 (m, 2H), 2.08 – 1.97 (m, 1H), 1.94 – 1.78 (m, 1H).  $^{13}\text{C}$  NMR (101 MHz,  $\text{CDCl}_3$ )  $\delta$  202.1, 151.1, 139.2, 137.5, 131.9, 131.0, 130.7, 129.0, 128.5, 128.3, 128.0, 127.1, 126.3 (q,  $J$  = 277.1 Hz), 76.0, 39.7, 37.0 (q,  $J$  = 28.3 Hz), 33.9 (q,  $J$  = 2.4 Hz), 26.6.  $^{19}\text{F}$  NMR (376 MHz,  $\text{CDCl}_3$ )  $\delta$  -63.5. HRMS (ESI)  $m/z$  calcd. For  $\text{C}_{20}\text{H}_{20}\text{O}_2\text{NClF}_3$   $[\text{M}+\text{H}]^+$  398.1129, found 398.1127.

**(*E*)-5-(naphthalen-1-yl)-5-oxo-2-(2,2,2-trifluoroethyl)pentanal O-benzyl oxime (3I)**

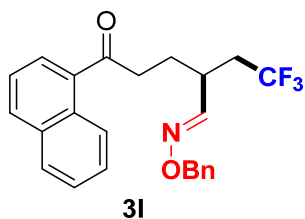

**3I:** (71% yield).  $^1\text{H}$  NMR (400 MHz,  $\text{CDCl}_3$ )  $\delta$  8.55 (d,  $J$  = 8.5 Hz, 1H), 7.98 (d,  $J$  = 8.2 Hz, 1H), 7.89 – 7.85 (m, 1H), 7.72 (dd,  $J$  = 7.2, 0.9 Hz, 1H), 7.60 – 7.50 (m, 2H), 7.46 (dd,  $J$  = 8.0, 7.4 Hz, 1H), 7.35 (d,  $J$  = 6.9 Hz, 1H), 7.30 – 7.17 (m, 5H), 5.06 – 4.97 (m, 2H), 3.01 (t,  $J$  = 7.3 Hz, 2H), 2.84 – 2.71 (m, 1H), 2.47 – 2.22 (m, 2H), 2.16 – 2.04 (m, 1H), 2.01 – 1.84 (m, 1H).  $^{13}\text{C}$  NMR (101 MHz,  $\text{CDCl}_3$ )  $\delta$  203.1, 151.3, 137.6, 135.7, 134.0, 132.9, 130.1, 128.5(4), 128.5(1), 128.2, 128.1, 127.9, 127.7, 126.6, 126.3 (q,  $J$  = 277.3 Hz), 125.8, 124.5, 75.9, 38.7, 37.1 (q,  $J$  = 28.1 Hz), 34.1 (q,  $J$  = 2.4 Hz), 26.9.  $^{19}\text{F}$  NMR (376 MHz,  $\text{CDCl}_3$ )  $\delta$  -63.5. HRMS (ESI)  $m/z$  calcd. for  $\text{C}_{24}\text{H}_{23}\text{O}_2\text{NF}_3$   $[\text{M}+\text{H}]^+$  414.1675, found 414.1673.

**(*E*)-5-(furan-2-yl)-5-oxo-2-(2,2,2-trifluoroethyl)pentanal O-benzyl oxime (3J)**

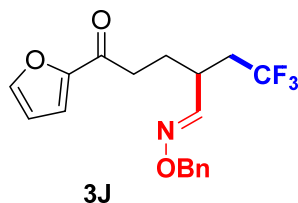

**3J:** (70% yield).  $^1\text{H}$  NMR (400 MHz,  $\text{CDCl}_3$ )  $\delta$  7.56 (d,  $J = 1.0$  Hz, 1H), 7.36 – 7.23 (m, 6H), 7.09 (d,  $J = 3.5$  Hz, 1H), 6.52 (dd,  $J = 3.6, 1.7$  Hz, 1H), 5.08 – 4.99 (m, 2H), 2.80 (t,  $J = 7.5$  Hz, 2H), 2.78 – 2.66 (m, 1H), 2.45 – 2.17 (m, 2H), 2.05 – 1.95 (m, 1H), 1.88 (ddd,  $J = 16.6, 10.7, 4.7$  Hz, 1H).  $^{13}\text{C}$  NMR (101 MHz,  $\text{CDCl}_3$ )  $\delta$  188.2, 152.5, 151.2, 146.5, 137.6, 128.5, 128.3, 128.0, 126.3 (q,  $J = 279.9$  Hz), 117.3, 112.38, 76.0, 36.9 (q,  $J = 28.3$  Hz), 35.1, 34.0 (d,  $J = 2.3$  Hz), 26.4.  $^{19}\text{F}$  NMR (376 MHz,  $\text{CDCl}_3$ )  $\delta$  -63.6. HRMS (ESI)  $m/z$  calcd. for  $\text{C}_{18}\text{H}_{19}\text{O}_3\text{NF}_3$   $[\text{M}+\text{H}]^+$  354.1311, found 354.1309.

**(E)-5-oxo-5-(thiophen-2-yl)-2-(2,2,2-trifluoroethyl)pentanal O-benzyl oxime (3K)**

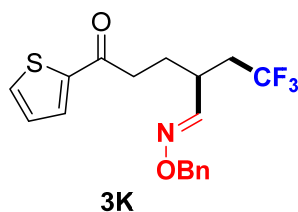

**3K:** (69% yield).  $^1\text{H}$  NMR (400 MHz,  $\text{CDCl}_3$ )  $\delta$  7.63 (dd,  $J = 4.9, 0.9$  Hz, 1H), 7.56 (dd,  $J = 3.8, 0.9$  Hz, 1H), 7.35 – 7.22 (m, 6H), 7.10 (dd,  $J = 4.9, 3.9$  Hz, 1H), 5.09 – 4.98 (m, 2H), 2.94 – 2.81 (m, 2H), 2.78 – 2.68 (m, 1H), 2.43 – 2.19 (m, 2H), 2.10 – 1.98 (m, 1H), 1.96 – 1.83 (m, 1H).  $^{13}\text{C}$  NMR (101 MHz,  $\text{CDCl}_3$ )  $\delta$  191.9, 151.2, 144.0, 137.7, 133.8, 132.1, 128.5, 128.3, 128.2, 128.0, 126.3 (q,  $J = 277.2$  Hz), 75.9, 37.0 (q,  $J = 28.2$  Hz), 36.0, 34.1 (q,  $J = 2.5$  Hz), 26.7.  $^{19}\text{F}$  NMR (376 MHz,  $\text{CDCl}_3$ )  $\delta$  -63.5. HRMS (ESI)  $m/z$  calcd. for  $\text{C}_{18}\text{H}_{19}\text{O}_2\text{NF}_3\text{S}$   $[\text{M}+\text{H}]^+$  370.1083, found 370.1080.

**(E)-5-oxo-7-phenyl-2-(2,2,2-trifluoroethyl)heptanal O-benzyl oxime (3L)**

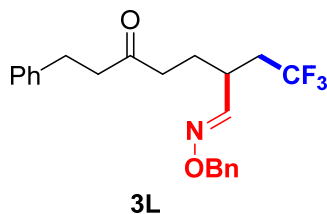

**3L:** (40% yield).  $^1\text{H}$  NMR (400 MHz,  $\text{CDCl}_3$ )  $\delta$  7.34 – 7.24 (m, 7H), 7.19 (t,  $J = 7.3$  Hz, 1H), 7.13 (d,  $J = 7.3$  Hz, 2H), 6.46 (d,  $J = 7.9$  Hz, 1H), 5.08 (s, 2H), 3.48 – 3.33 (m, 1H), 2.83 (t,  $J = 7.6$  Hz, 2H), 2.63 – 2.57 (m, 2H), 2.42 – 2.28 (m, 2H), 2.27 – 2.13 (m, 2H), 1.93 – 1.73 (m, 1H), 1.60 – 1.52 (m, 1H).  $^{13}\text{C}$  NMR (101 MHz,  $\text{CDCl}_3$ )  $\delta$  208.7, 152.1, 141.0, 137.7, 128.6(4), 128.6(3), 128.4, 128.2, 128.1, 126.3, 126.2 (q,  $J = 277.5$  Hz), 76.3, 44.4, 40.0, 37.1 (q,  $J = 28.2$  Hz), 29.8, 29.7 (q,  $J = 2.9$  Hz), 26.0.  $^{19}\text{F}$  NMR (376 MHz,  $\text{CDCl}_3$ )  $\delta$  -63.6. HRMS (ESI)  $m/z$  calcd. for  $\text{C}_{22}\text{H}_{25}\text{O}_2\text{NF}_3[\text{M}+\text{H}]^+$  392.1832, found 392.1828.

**(E)-4-(1-((benzyloxy)imino)ethyl)-6,6,6-trifluoro-1-phenylhexan-1-one (3M)**

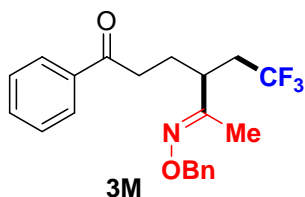

**3M:** (79% yield).  $^1\text{H}$  NMR (400 MHz,  $\text{CDCl}_3$ )  $\delta$  7.85 – 7.77 (m, 2H), 7.55 (t,  $J = 7.4$  Hz, 1H), 7.43 (t,  $J = 7.7$  Hz, 2H), 7.34 – 7.20 (m, 5H), 5.08 – 4.90 (m, 2H), 2.87 – 2.77 (m, 2H), 2.76 – 2.67 (m, 1H), 2.48 – 2.35 (m, 1H), 2.30 – 2.17 (m, 1H), 2.02 – 1.88 (m, 2H), 1.84 (s, 3H).  $^{13}\text{C}$  NMR (101 MHz,  $\text{CDCl}_3$ )  $\delta$  199.1, 157.2, 138.4, 136.8, 133.2, 128.7, 128.4, 128.1, 127.9, 127.7, 126.4 (q,  $J = 277.1$  Hz), 75.6, 38.9 (q,  $J = 2.3$  Hz), 36.4 (q,  $J = 28.1$  Hz), 35.3, 26.2, 11.9.  $^{19}\text{F}$  NMR (376 MHz,  $\text{CDCl}_3$ )  $\delta$  -64.2. HRMS (ESI)  $m/z$  calcd. For  $\text{C}_{21}\text{H}_{23}\text{O}_2\text{NF}_3$   $[\text{M}+\text{H}]^+$  378.1675, found 378.1674.

**(E)-5-(1-((benzyloxy)imino)ethyl)-7,7,7-trifluoroheptan-2-one (3N)**

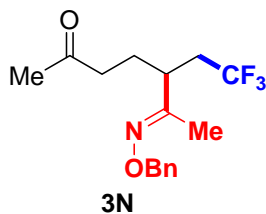

**3N:** (25% yield).  $^1\text{H}$  NMR (400 MHz,  $\text{CDCl}_3$ )  $\delta$  7.40 – 7.23 (m, 5H), 5.11 – 4.98 (m, 2H), 3.63 – 3.45 (m, 1H), 2.42 – 2.30 (m, 2H), 2.30 – 2.23 (m, 1H), 2.22 – 2.09 (m, 1H), 2.01 (s, 3H), 1.85 – 1.73 (m, 4H), 1.74 – 1.65 (m, 1H).  $^{13}\text{C}$  NMR (101 MHz,  $\text{CDCl}_3$ )  $\delta$  207.5, 157.2, 137.9, 128.4, 128.2, 127.9, 126.3 (q,  $J = 277.1$  Hz), 75.8, 40.5, 36.1 (q,  $J = 28.3$  Hz), 31.7 (q,  $J = 2.4$  Hz), 29.9, 25.3, 16.3.  $^{19}\text{F}$  NMR (376 MHz,  $\text{CDCl}_3$ )  $\delta$  -64.7. HRMS (ESI)  $m/z$  calcd. For  $\text{C}_{19}\text{H}_{20}\text{ONF}_2$   $[\text{M}+\text{H}]^+$  316.1507, found 316.1517.

**(E)-5-oxo-5-phenyl-2-(2,2,2-trifluoroethyl)pentanal O-(4-methoxybenzyl) oxime (3O)**

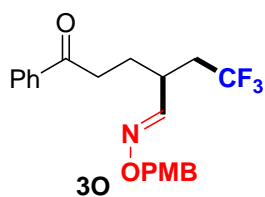

**3O:** (80% yield).  $^1\text{H}$  NMR (400 MHz,  $\text{CDCl}_3$ )  $\delta$  7.91 (dd,  $J = 8.0, 1.5$  Hz, 2H), 7.60 (t,  $J = 7.4$  Hz, 1H), 7.49 (t,  $J = 7.6$  Hz, 2H), 7.34 (d,  $J = 7.3$  Hz, 1H), 7.29 (d,  $J = 8.5$  Hz, 2H), 6.86 (d,  $J = 8.6$  Hz, 2H), 5.00 (s, 2H), 3.77 (s, 3H), 2.97 (td,  $J = 7.5, 7.0, 2.9$  Hz, 2H), 2.83 – 2.73 (m, 1H), 2.49 – 2.24 (m, 2H), 2.06 (ddt,  $J = 14.7, 7.7, 4.5$  Hz, 1H), 2.01 – 1.85 (m, 1H).  $^{13}\text{C}$  NMR (101 MHz,  $\text{CDCl}_3$ )  $\delta$  198.9, 159.4, 151.0, 136.7, 133.2, 129.9, 129.6, 128.6, 128.0, 126.3 (q,  $J = 277.4$  Hz), 113.8, 75.5, 55.2, 37.0 (q,  $J = 28.1$  Hz), 35.2, 34.0 (q,  $J = 2.4$  Hz), 26.5.  $^{19}\text{F}$  NMR (376 MHz,  $\text{CDCl}_3$ )  $\delta$  -63.5. HRMS (ESI)  $m/z$  calcd. For  $\text{C}_{21}\text{H}_{23}\text{O}_3\text{NF}_3$   $[\text{M}+\text{H}]^+$  394.1625, found 394.1623.

**(E)-6-oxo-6-phenyl-2-(2,2,2-trifluoroethyl)hexanal O-benzyl oxime (3P)**

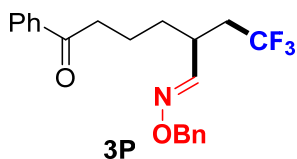

**3P**: (69% yield).  $^1\text{H}$  NMR (400 MHz,  $\text{CDCl}_3$ )  $\delta$  7.97 – 7.84 (m, 2H), 7.56 (t,  $J$  = 7.4 Hz, 1H), 7.46 (t,  $J$  = 7.6 Hz, 2H), 7.39 – 7.29 (m, 5H), 7.29 – 7.24 (m, 1H), 5.06 (s, 2H), 3.05 – 2.86 (m, 2H), 2.76 – 2.65 (m, 1H), 2.43 – 2.1 (m, 2H), 1.84 – 1.68 (m, 2H), 1.67 – 1.53 (m, 2H).  $^{13}\text{C}$  NMR (101 MHz,  $\text{CDCl}_3$ )  $\delta$  199.6, 151.6, 137.6, 136.9, 133.2, 128.8, 128.5, 128.3, 128.1, 128.0, 127.6 (q,  $J$  = 278.9 Hz), 76.0, 37.9, 36.5 (q,  $J$  = 28.1 Hz), 34.3, 32.2 (q,  $J$  = 2.7 Hz), 21.0.  $^{19}\text{F}$  NMR (376 MHz,  $\text{CDCl}_3$ )  $\delta$  -63.5. HRMS (ESI)  $m/z$  calcd. For  $\text{C}_{21}\text{H}_{23}\text{O}_2\text{NF}_3$   $[\text{M}+\text{H}]^+$  378.1675, found 378.1673.

#### General Procedure for synthesis of fluoroalkylated oximes.

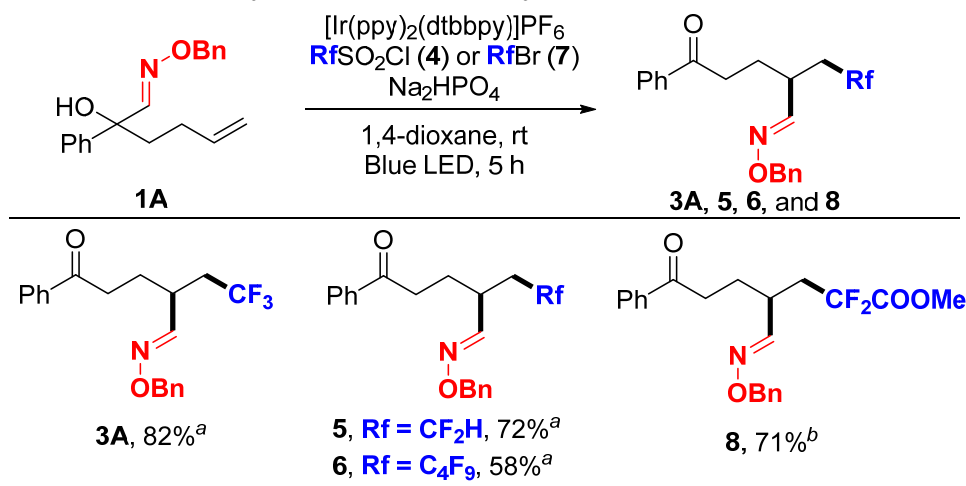

In an oven-dried 10 mL tube were added **1A** (44 mg, 0.2 mmol), sulfonyl chloride (**4**, 0.3 mmol),  $\text{Na}_2\text{HPO}_4$  (144 mg, 0.4 mmol) and  $[\text{Ir}(\text{dtbbpy})(\text{ppy})_2]\text{PF}_6$  (1.6 mg, 0.002 mmol) sequentially. The tube was vacuumed and back-filled with argon three times and then added with 1,4-dioxane (2 mL). The reaction mixture was irradiated with blue LED for 5 h at 25 °C. EtOAc (30 mL) was added and the organic layer was washed with water (5 mL) and brine (5 mL) sequentially, dried over anhydrous  $\text{Na}_2\text{SO}_4$ , filtered and concentrated to afford the crude product, which was purified by flash column chromatography to afford the product **3A** (82% yield), **5**, and **6**.

The procedure for synthesis of **8** is similar to that reported for synthesis of **3A**.

**(E)-2-(2,2-difluoroethyl)-5-oxo-5-phenylpentanal O-benzyl oxime (5)**

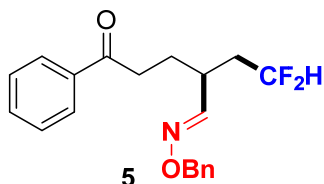

**5**: (72% yield). <sup>1</sup>H NMR (400 MHz, CDCl<sub>3</sub>) δ 7.87 (d, *J* = 7.4 Hz, 2H), 7.57 (t, *J* = 7.4 Hz, 1H), 7.45 (t, *J* = 7.7 Hz, 2H), 7.37 – 7.23 (m, 6H), 5.84 (tdd, *J* = 56.5, 5.5, 4.0 Hz, 1H), 5.08 – 4.99 (m, 2H), 2.94 (t, *J* = 7.4 Hz, 2H), 2.67 – 2.56 (m, 1H), 2.17 – 1.83 (m, 4H). <sup>13</sup>C NMR (101 MHz, CDCl<sub>3</sub>) δ 199.5, 152.1, 137.7, 136.8, 133.3, 128.7, 128.5, 128.3, 128.1, 128.0, 116.1 (t, *J* = 239.2 Hz), 75.9, 37.2 (t, *J* = 21.4 Hz), 35.5, 34.4 (q, *J* = 4.5 Hz), 26.8. <sup>19</sup>F NMR (376 MHz, CDCl<sub>3</sub>) δ -115.2 (q, *J* = 284.5 Hz). HRMS (ESI) *m/z* calcd. For C<sub>20</sub>H<sub>22</sub>O<sub>2</sub>NF<sub>2</sub> [M+H]<sup>+</sup> 346.1613, found 346.1610.

**(E)-7,7,7,7,7,7,7,7,7-nonafluoro-2-(3-oxo-3-phenylpropyl)-7I12-hepta-4,6-diynal O-benzyl oxime (6)**

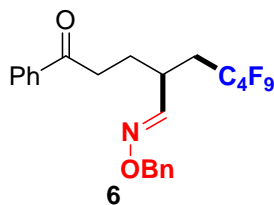

**6**: (58% yield). <sup>1</sup>H NMR (400 MHz, CDCl<sub>3</sub>) δ 7.92 – 7.82 (m, 2H), 7.57 (t, *J* = 7.4 Hz, 1H), 7.45 (t, *J* = 7.7 Hz, 2H), 7.36 (dd, *J* = 7.2, 1.2 Hz, 1H), 7.33 – 7.24 (m, 5H), 5.07 – 4.99 (m, 2H), 2.98 – 2.91 (m, 2H), 2.91 – 2.82 (m, 1H), 2.48 – 2.14 (m, 2H), 2.11 – 2.00 (m, 1H), 2.00 – 1.88 (m, 1H). <sup>13</sup>C NMR (126 MHz, CDCl<sub>3</sub>) δ 199.0, 151.5, 137.7, 136.8, 133.3, 128.7, 128.5, 128.3, 128.1, 128.0, 120.1 – 104.0 (m), 75.9, 35.4, 33.8 (t, *J* = 21.2 Hz), 32.9, 27.2. <sup>19</sup>F NMR (376 MHz, CDCl<sub>3</sub>) δ -81.0 – -81.1 (m), -111.4 – -113.8 (m), -122.5 – -131.0 (m). HRMS (ESI) *m/z* calcd. For C<sub>23</sub>H<sub>21</sub>O<sub>2</sub>NF<sub>9</sub> [M+H]<sup>+</sup> 514.1423, found 514.1422.

**methyl (*E*)-4-(((benzyloxy)imino)methyl)-2,2-difluoro-7-oxo-7-phenylheptanoate (**8**)**

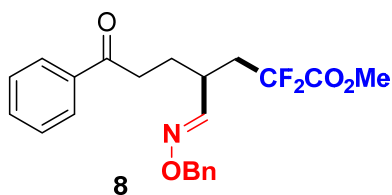

**8**: (71% yield).  $^1\text{H}$  NMR (400 MHz,  $\text{CDCl}_3$ )  $\delta$  7.90 – 7.83 (m, 2H), 7.57 (t,  $J = 7.4$  Hz, 1H), 7.45 (t,  $J = 7.7$  Hz, 2H), 7.34 – 7.22 (m, 6H), 5.02 (s, 2H), 3.84 (s, 3H), 3.04 – 2.86 (m, 2H), 2.78 – 2.65 (m, 1H), 2.49 – 2.35 (m, 1H), 2.34 – 2.17 (m, 1H), 2.05 – 1.85 (m, 2H).  $^{13}\text{C}$  NMR (101 MHz,  $\text{CDCl}_3$ )  $\delta$  199.1, 164.4 (t,  $J = 32.7$  Hz), 151.9, 137.7, 136.8, 133.2, 128.7, 128.5, 128.3, 128.1, 127.9, 119.7 – 112.1 (m), 75.8, 53.6, 37.7 (t,  $J = 22.9$  Hz), 35.4, 33.8 (t,  $J = 3.4$  Hz), 27.1.  $^{19}\text{F}$  NMR (376 MHz,  $\text{CDCl}_3$ )  $\delta$  -103.4 (dd,  $J = 631.2$ , 264.3 Hz). HRMS (ESI)  $m/z$  calcd. For  $\text{C}_{22}\text{H}_{24}\text{O}_4\text{NF}_2$   $[\text{M}+\text{H}]^+$  404.1667, found 404.1664.

**General procedure for ring expansion strategy for synthesis of medium-sized rings.**

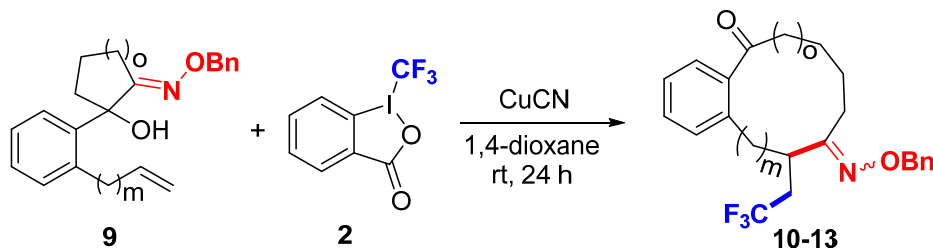

In an oven-dried 10 mL Schlenk tube were added **9** (0.20 mmol), CuCN (1.6 mg, 0.02 mmol) and Togni's reagent **2** (75 mg, 0.24 mmol). The tube was vacuumed and back-filled with argon three times and then added with 1,4-dioxane (2 mL). The reaction mixture was stirred at 25 °C for 24 h. The solvent was removed under reduced pressure to afford the crude product, which was purified by flash column chromatography to afford the product **10-13**.

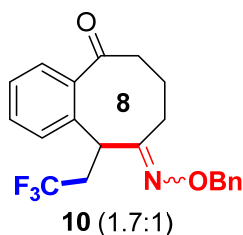

**10** (82% overall yield). (major isomer).  $^1\text{H}$  NMR (400 MHz,  $\text{CDCl}_3$ )  $\delta$  7.42 – 7.26 (m, 8H), 7.13 – 7.07 (m, 1H), 5.09 (q,  $J$  = 12.2 Hz, 2H), 3.90 (t,  $J$  = 6.7 Hz, 1H), 3.31 – 3.16 (m, 2H), 2.80 – 2.62 (m, 2H), 2.55 – 2.44 (m, 1H), 2.16 – 2.03 (m, 1H), 1.79 – 1.62 (m, 2H).  $^{13}\text{C}$  NMR (101 MHz,  $\text{CDCl}_3$ )  $\delta$  209.8, 156.7, 140.6, 137.6, 136.0, 130.1, 128.6, 128.4, 128.3, 127.9, 127.8, 127.0 (q,  $J$  = 277.2 Hz), 125.8, 76.4, 43.9, 42.9 (q,  $J$  = 2.7 Hz), 37.0 (q,  $J$  = 27.6 Hz), 27.0, 20.9.  $^{19}\text{F}$  NMR (376 MHz,  $\text{CDCl}_3$ )  $\delta$  -63.6. HRMS (ESI)  $m/z$  calcd. For  $\text{C}_{21}\text{H}_{21}\text{O}_2\text{NF}_3$   $[\text{M}+\text{H}]^+$  376.1519, found 376.1518.

**10** (minor isomer).  $^1\text{H}$  NMR (400 MHz,  $\text{CDCl}_3$ )  $\delta$  7.42 – 7.22 (m, 7H), 7.12 – 7.01 (m, 2H), 4.95 (q,  $J$  = 11.9 Hz, 2H), 4.46 (dd,  $J$  = 9.7, 4.2 Hz, 1H), 3.23 – 3.07 (m, 1H), 3.00 – 2.89 (m, 1H), 2.83 – 2.68 (m, 2H), 2.69 – 2.59 (m, 1H), 2.55 – 2.44 (m, 1H), 2.18 – 2.05 (m, 2H).  $^{13}\text{C}$  NMR (101 MHz,  $\text{CDCl}_3$ )  $\delta$  209.2, 157.9, 140.5, 137.2, 135.4, 130.8, 128.3, 128.2, 127.9, 127.8, 127.6, 127.4, 126.4 (q,  $J$  = 277.7 Hz), 76.2, 43.3, 38.8 (q,  $J$  = 2.8 Hz), 35.7 (q,  $J$  = 28.3 Hz), 33.67, 24.7.  $^{19}\text{F}$  NMR (376 MHz,  $\text{CDCl}_3$ )  $\delta$  -64.6. HRMS (ESI)  $m/z$  calcd. For  $\text{C}_{21}\text{H}_{21}\text{O}_2\text{NF}_3$   $[\text{M}+\text{H}]^+$  376.1519, found 376.1517.

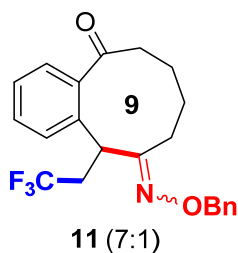

**11**: (76% yield, major isomer).  $^1\text{H}$  NMR (400 MHz,  $\text{CDCl}_3$ )  $\delta$  7.42 – 7.26 (m, 8H), 7.13 – 7.07 (m, 1H), 5.09 (q,  $J$  = 12.2 Hz, 2H), 3.90 (t,  $J$  = 6.7 Hz, 1H), 3.31 – 3.16 (m, 1H), 2.80 – 2.62 (m, 3H), 2.55 – 2.44 (m, 1H), 2.16 – 2.03 (m, 1H), 1.79 – 1.66 (m, 1H), 1.64 – 1.49 (m, 2H), 1.46 – 1.33 (m, 1H).  $^{13}\text{C}$  NMR (101 MHz,  $\text{CDCl}_3$ )  $\delta$  211.6, 157.9, 140.9, 138.0, 136.1, 130.4, 129.8, 128.4, 128.3, 127.9, 127.4, 127.0 (q,  $J$  = 277.2 Hz), 124.8,

76.5, 45.1, 44.4 (q,  $J = 2.7$  Hz), 37.4 (q,  $J = 27.6$  Hz), 30.5, 24.8, 24.5.  $^{19}\text{F}$  NMR (376 MHz,  $\text{CDCl}_3$ )  $\delta$  -63.6. HRMS (ESI)  $m/z$  calcd. For  $\text{C}_{22}\text{H}_{23}\text{O}_2\text{NF}_3$   $[\text{M}+\text{H}]^+$  390.1675, found 390.1672.

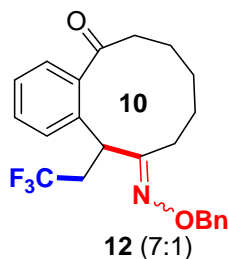

**12:** (77% yield, major isomer).  $^1\text{H}$  NMR (400 MHz,  $\text{CDCl}_3$ )  $\delta$  7.41 (t,  $J = 7.4$  Hz, 1H), 7.36 – 7.22 (m, 8H), 5.07 (s, 2H), 4.56 (dd,  $J = 8.4, 5.0$  Hz, 1H), 3.24 – 3.09 (m, 2H), 2.74 – 2.48 (m, 3H), 1.87 – 1.64 (m, 2H), 1.56 – 1.30 (m, 5H).  $^{13}\text{C}$  NMR (101 MHz,  $\text{CDCl}_3$ )  $\delta$  209.8, 160.1, 141.1, 138.1, 137.5, 130.9, 128.4, 128.2, 128.0, 127.8, 127.0, 126.7 (q,  $J = 278.0$  Hz), 126.2, 75.9, 44.0, 36.3 (q,  $J = 2.5$  Hz), 34.8 (q,  $J = 28.3$  Hz), 27.7, 23.3, 22.1, 22.0.  $^{19}\text{F}$  NMR (376 MHz,  $\text{CDCl}_3$ )  $\delta$  -63.7. HRMS (ESI)  $m/z$  calcd. For  $\text{C}_{23}\text{H}_{25}\text{O}_2\text{NF}_3$   $[\text{M}+\text{H}]^+$  404.1832, found 404.1830.

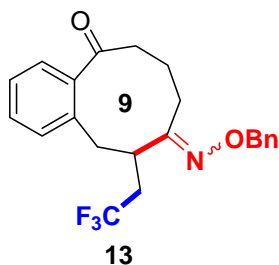

**13:** (67% yield).  $^1\text{H}$  NMR (400 MHz,  $\text{CDCl}_3$ )  $\delta$  7.37 – 7.22 (m, 7H), 7.17 – 7.11 (m, 2H), 5.05 – 4.83 (m, 2H), 3.53 – 3.14 (m, 1H), 2.98 – 2.47 (m, 5H), 2.44 – 2.11 (m, 3H), 2.07 – 1.72 (m, 2H).  $^{13}\text{C}$  NMR (126 MHz,  $\text{CDCl}_3$ )  $\delta$  210.8, 158.4, 141.0, 137.4, 136.5, 131.4, 129.6, 128.4, 128.1, 127.8, 126.6, 126.4 (q,  $J = 276.0$  Hz), 124.2, 76.1, 43.3, 36.2 (q,  $J = 27.0$  Hz), 35.5, 29.8 (q,  $J = 2.7$  Hz), 27.2, 22.8.  $^{19}\text{F}$  NMR (376 MHz,  $\text{CDCl}_3$ )  $\delta$  -64.7. HRMS (ESI)  $m/z$  calcd. For  $\text{C}_{22}\text{H}_{23}\text{O}_2\text{NF}_3$   $[\text{M}+\text{H}]^+$  390.1675, found 390.1673.

### Removal of PMB group of 30

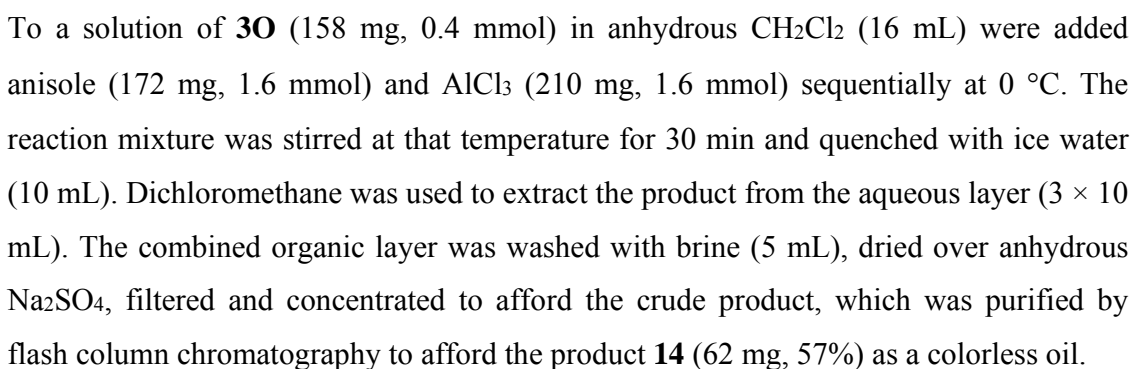

**14:** (57% yield). <sup>1</sup>H NMR (400 MHz, CDCl<sub>3</sub>) δ 7.96 (dd, *J* = 8.2, 1.4 Hz, 2H), 7.71 (brs, 1H), 7.62 – 7.56 (m, 1H), 7.48 (t, *J* = 7.6 Hz, 2H), 7.35 (d, *J* = 7.4 Hz, 1H), 3.14 – 2.97 (m, 2H), 2.85 – 2.73 (m, 1H), 2.50 – 2.26 (m, 2H), 2.14 – 2.03 (m, 1H), 2.02 – 1.90 (m, 1H). <sup>13</sup>C NMR (101 MHz, CDCl<sub>3</sub>) δ 199.1, 152.4, 136.8, 133.4, 128.8, 128.1, 126.3 (q, *J* = 277.1 Hz), 37.1 (q, *J* = 28.3 Hz), 35.4, 34.0 (q, *J* = 2.5 Hz), 26.7. <sup>19</sup>F NMR (376 MHz, CDCl<sub>3</sub>) δ -63.6. HRMS (ESI) *m/z* calcd. For C<sub>13</sub>H<sub>15</sub>O<sub>2</sub>NF<sub>3</sub> [M+H]<sup>+</sup> 274.1049, found 274.1049.

### Transformation of medium-sized oxime 11 to lactam 15

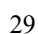

To a solution of **11** (39 mg, 0.10 mmol) in methanol (2 mL) was added NaOMe (23 mg, 0.40 mmol) at room temperature. The reaction mixture was heated up to 60 °C for 2 h, cooled down to room temperature and quenched with H<sub>2</sub>O (3 mL). EtOAc (10 mL) was added and the organic layer was washed with brine (5 mL), dried over anhydrous Na<sub>2</sub>SO<sub>4</sub>, filtered and concentrated to afford the crude product, which was purified by flash column chromatography to afford the product **15** (12 mg, 40%).

**10-(2,2,2-trifluoroethyl)-2,3,4,10-tetrahydrobenzo[e]cyclopenta[b]azepin-5(1H)-one (15)**

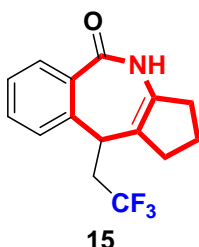

**15**: (40% yield). <sup>1</sup>H NMR (400 MHz, CDCl<sub>3</sub>) δ 8.03 (dd, *J* = 7.8, 1.2 Hz, 1H), 7.91 (brs, 1H), 7.49 (td, *J* = 7.5, 1.4 Hz, 1H), 7.39 (td, *J* = 7.6, 1.2 Hz, 1H), 7.14 (d, *J* = 7.2 Hz, 1H), 3.59 (dd, *J* = 8.7, 6.2 Hz, 1H), 2.72 – 2.32 (m, 6H), 2.01 – 1.88 (m, 2H). <sup>13</sup>C NMR (101 MHz, CDCl<sub>3</sub>) δ 168.9, 142.5, 132.9, 132.5, 131.7, 131.5, 127.8, 127.4, 124.7, 39.2 (q, *J* = 2.8 Hz), 36.2 (q, *J* = 27.1 Hz), 34.9, 33.9, 21.3. <sup>19</sup>F NMR (376 MHz, CDCl<sub>3</sub>) δ -64.54. HRMS (ESI) *m/z* calcd. For C<sub>15</sub>H<sub>15</sub>ONF<sub>3</sub> [M+H]<sup>+</sup> 282.1100, found 282.1100.

**Large-scale synthesis**

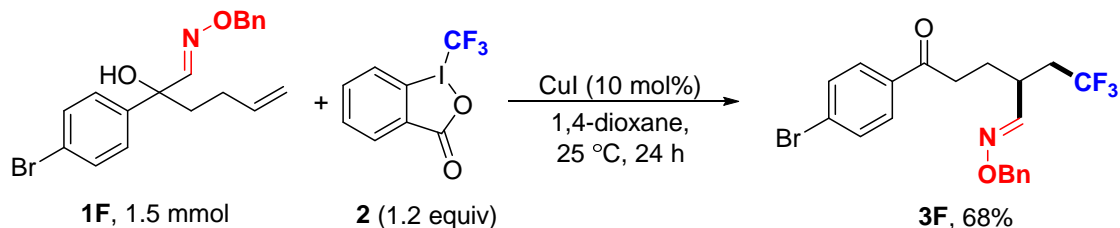

The procedure for large-scale synthesis is similar to that for synthesis of **3A**.

### Control experiment with TEMPO as radical scavenger

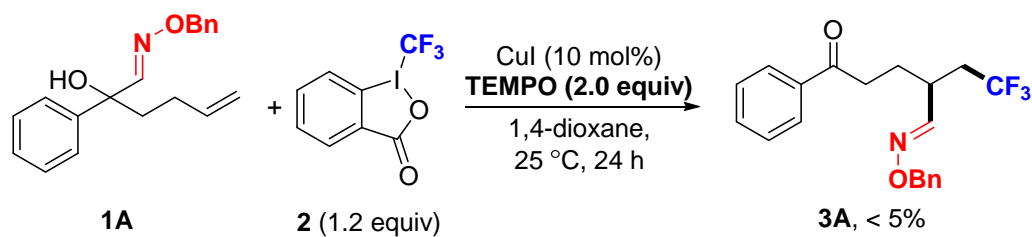

In an oven-dried 10 mL Schlenk tube were added **1A** (0.20 mmol), CuI (4 mg, 0.02 mmol), Togni's reagent **2** (75 mg, 0.24 mmol) and TEMPO (60 mg, 0.4 mmol). The tube was vacuumed and back-filled with argon three times and then added with 1,4-dioxane (2 mL). The reaction mixture was stirred at 25 °C for 24 h. NMR showed most of **1A** existed and trace amount of **3A** was detected.

## NMR Spectra

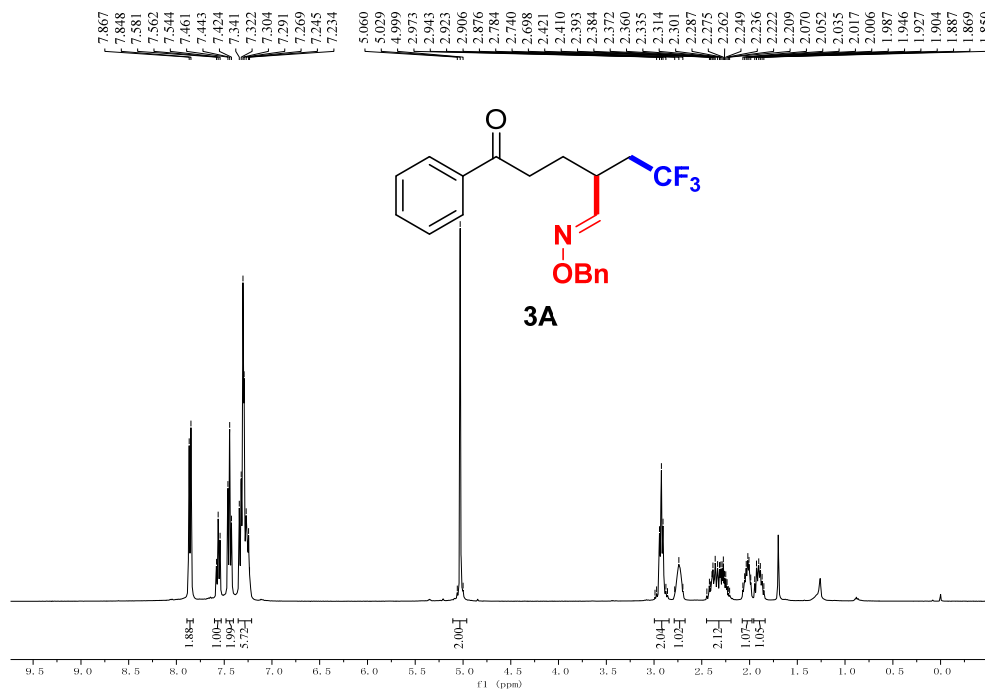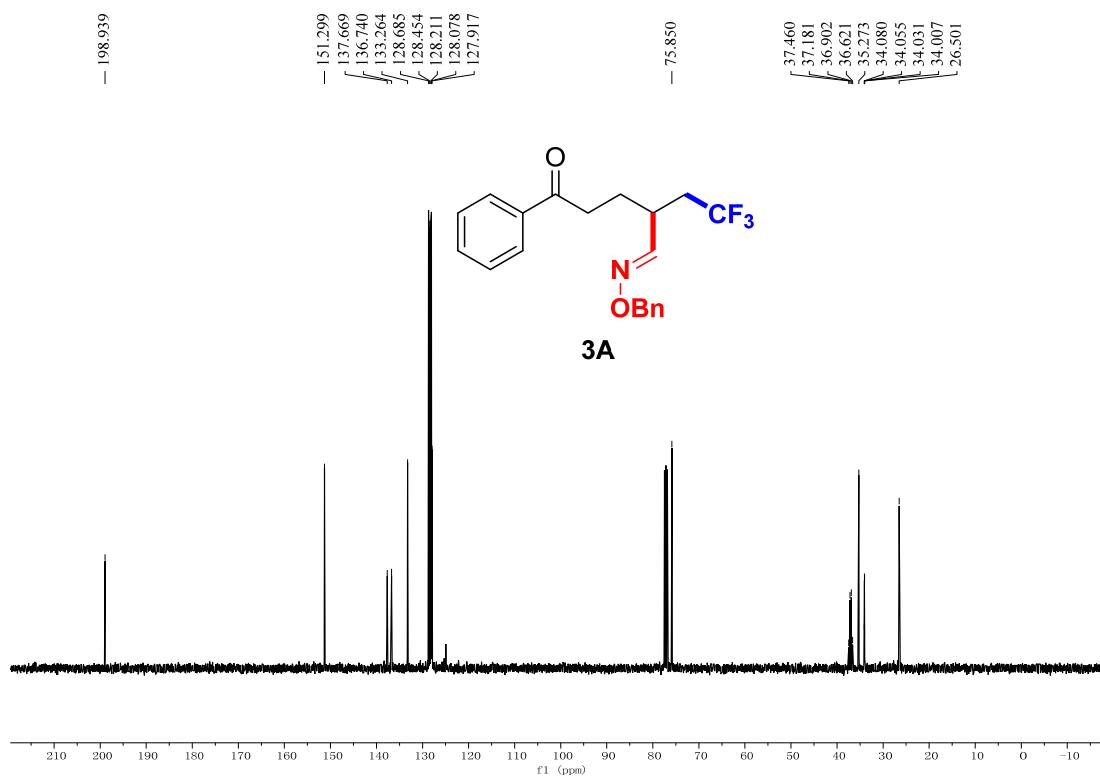

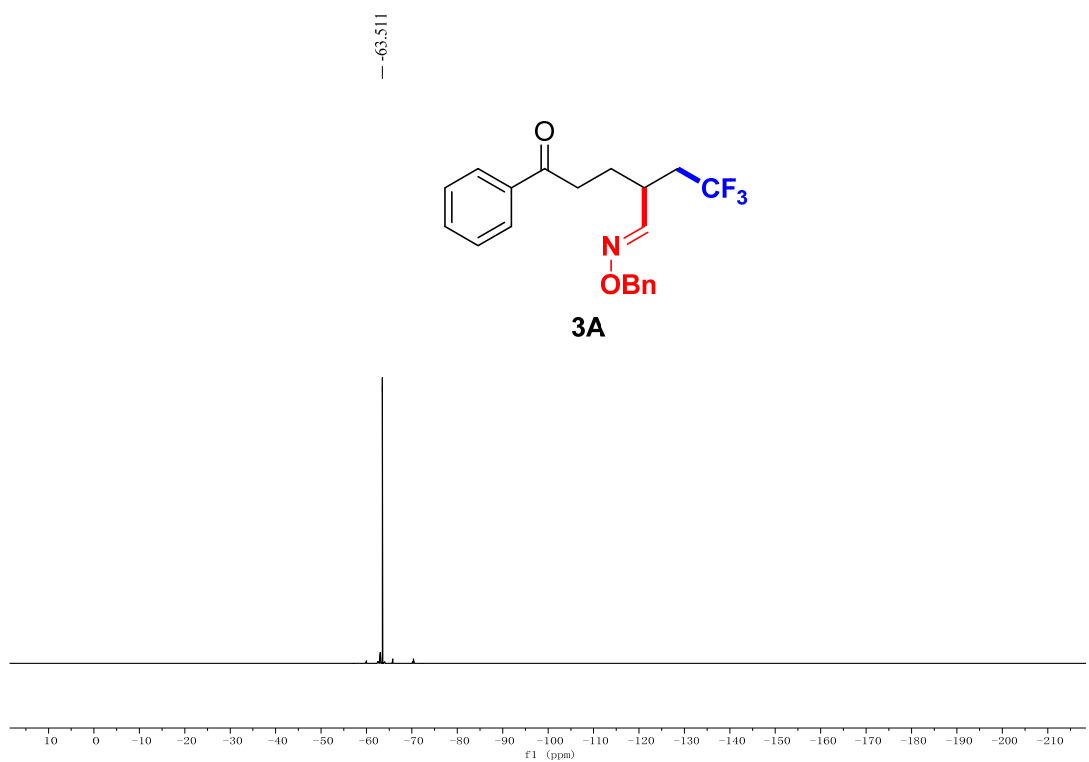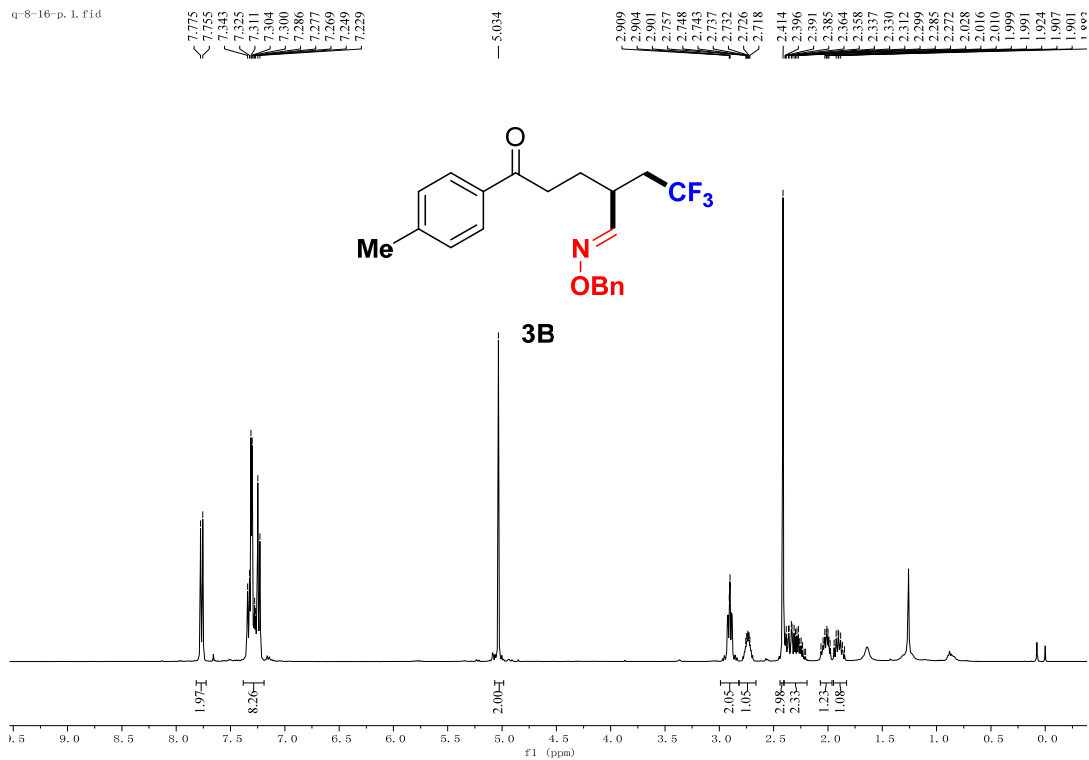

q-8-16-pc-c-3B.fid

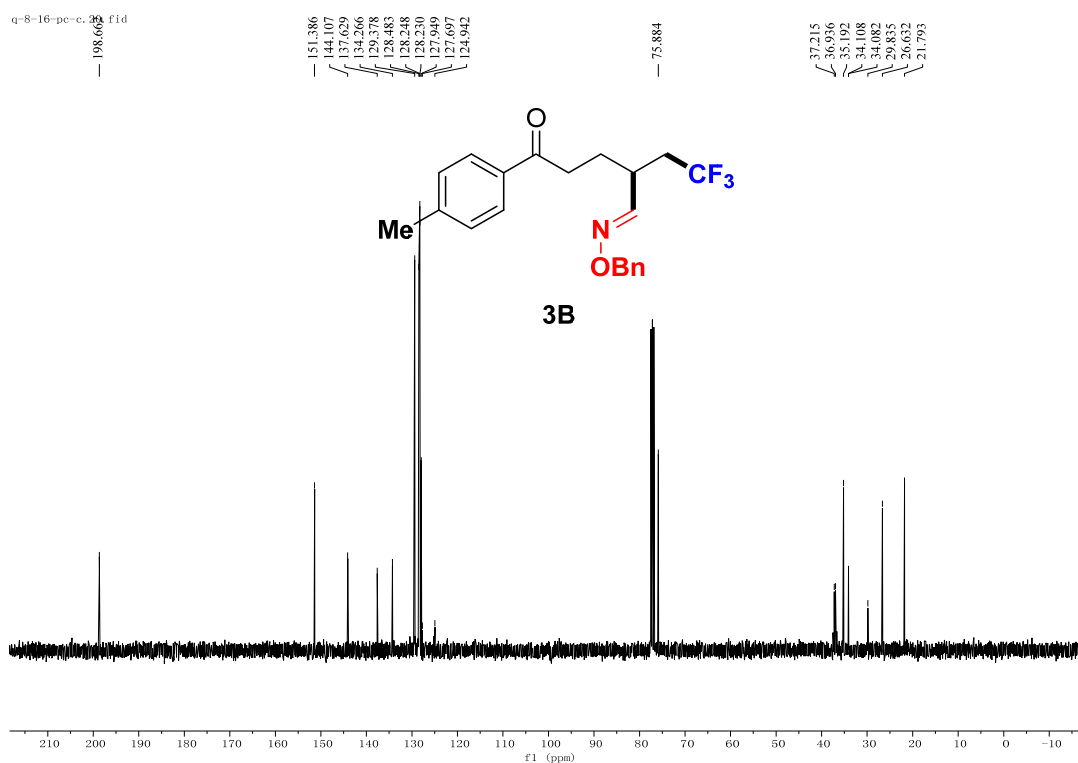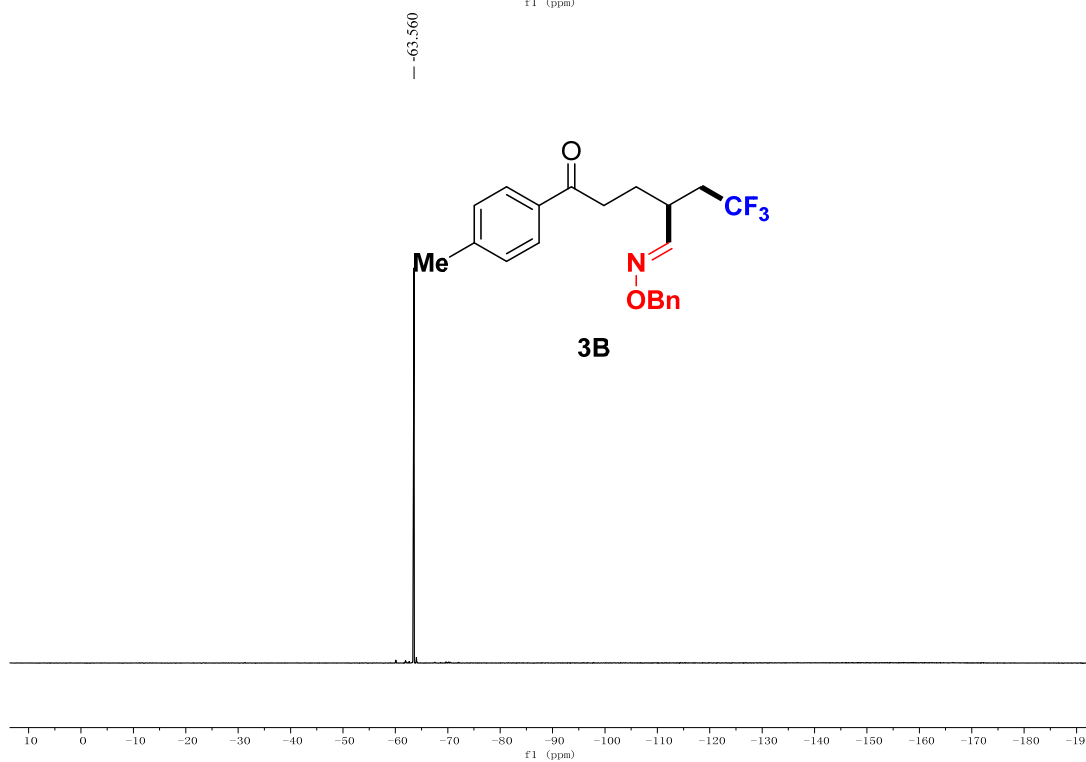

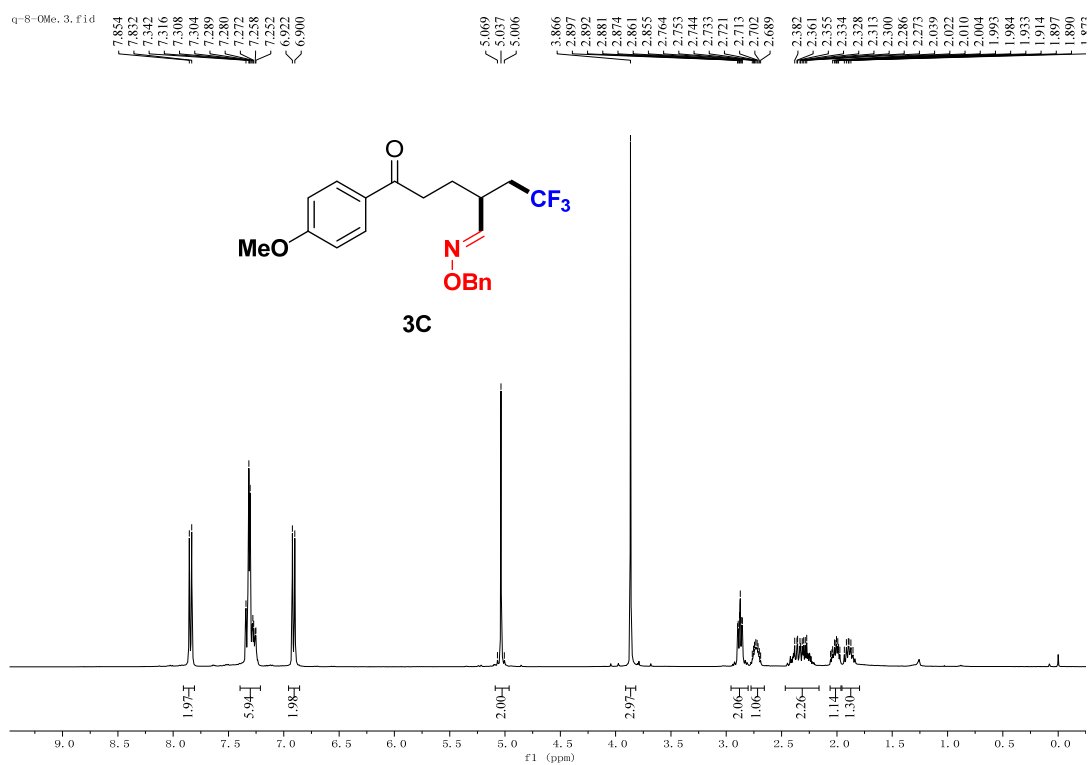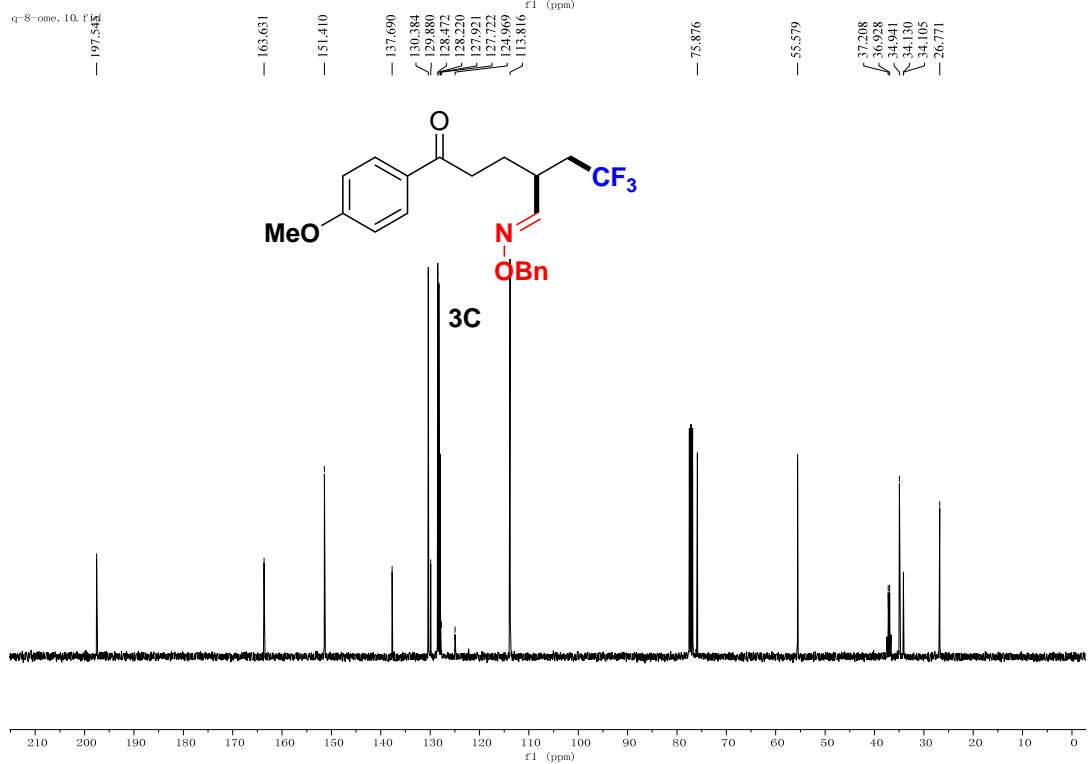

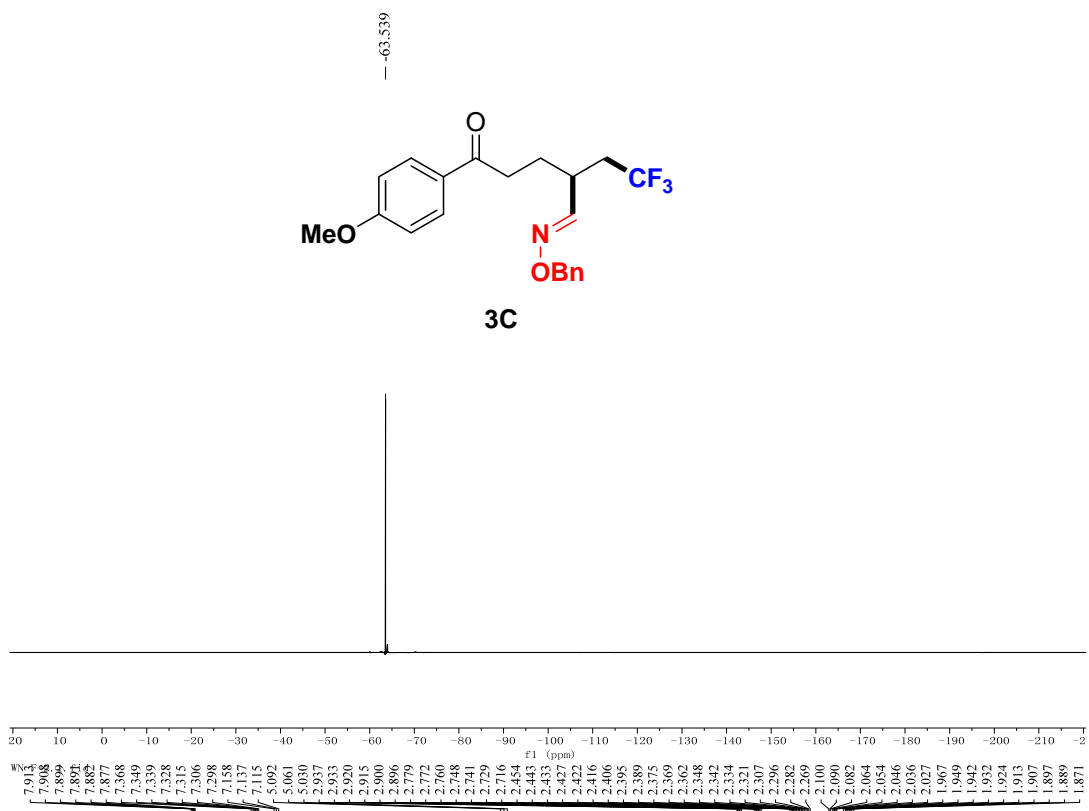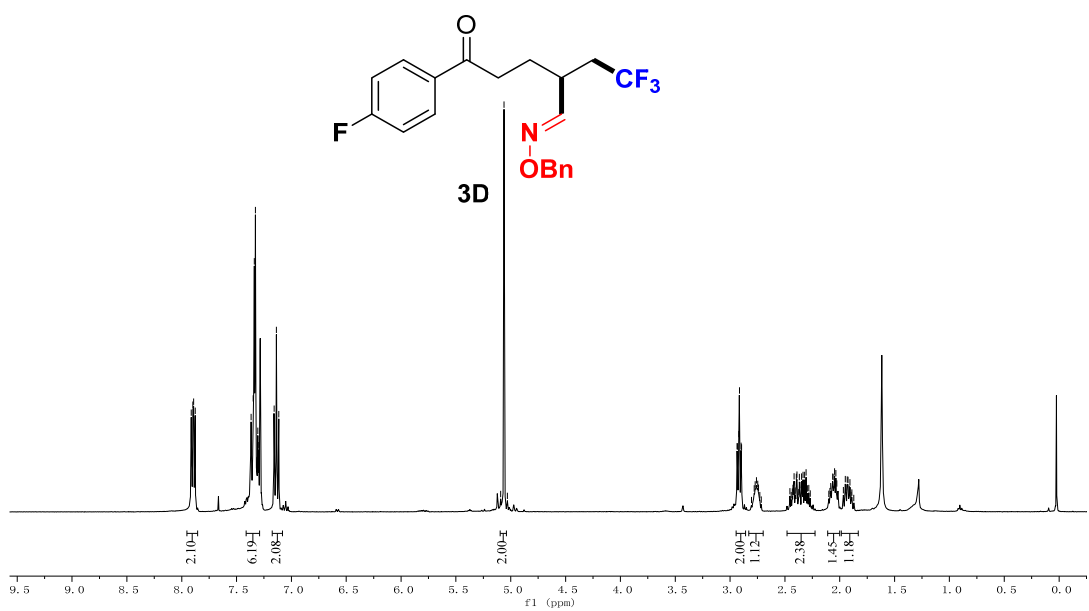

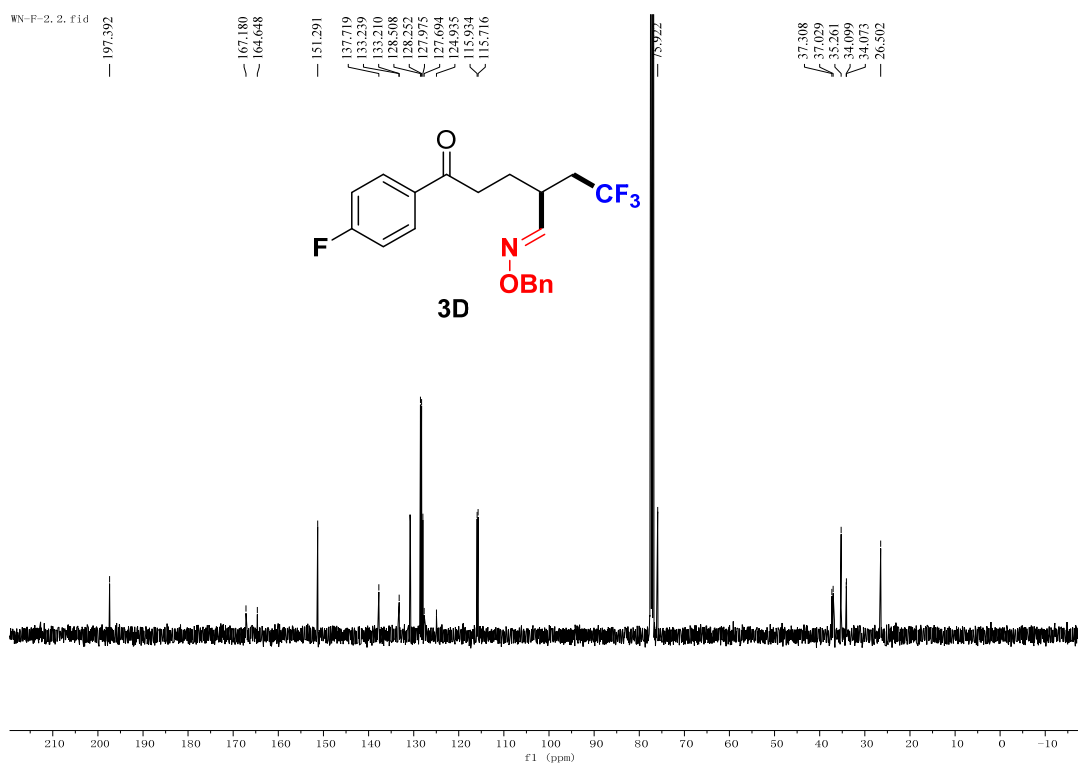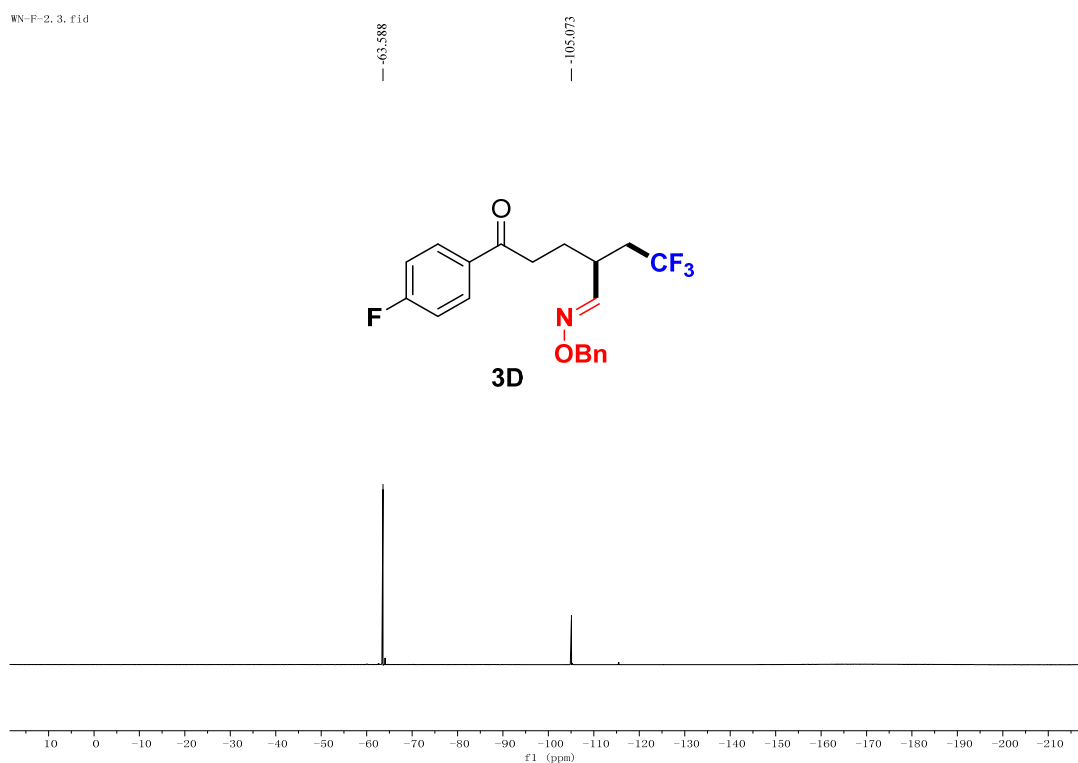

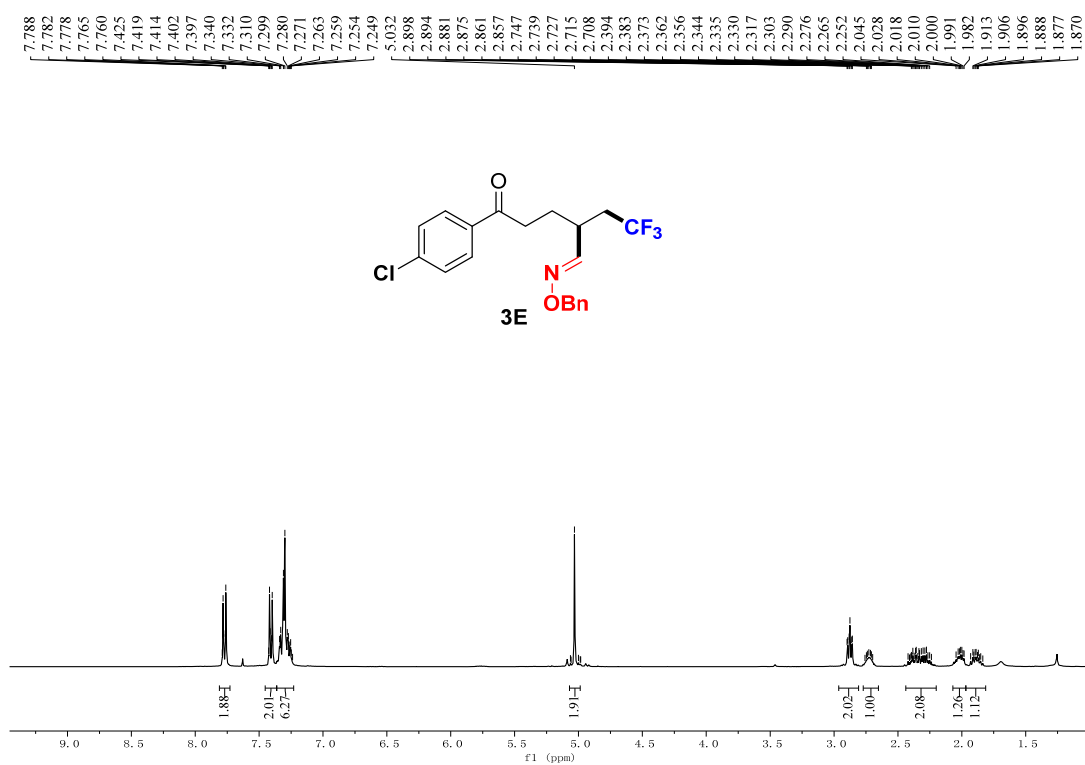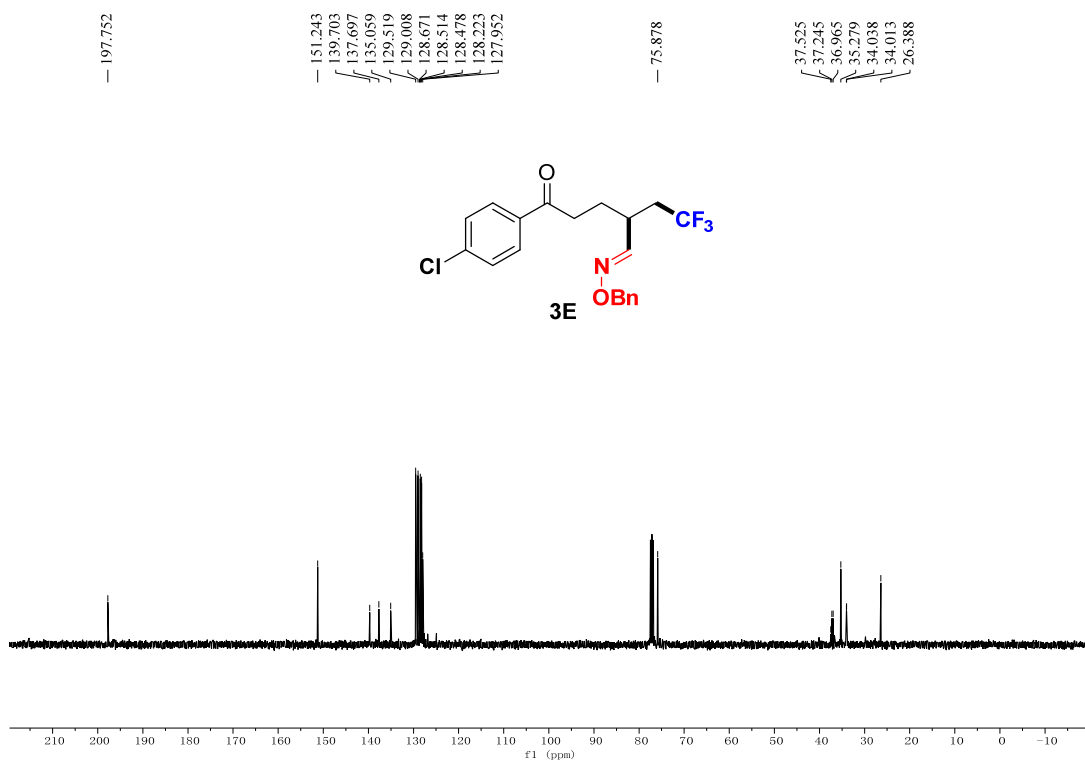

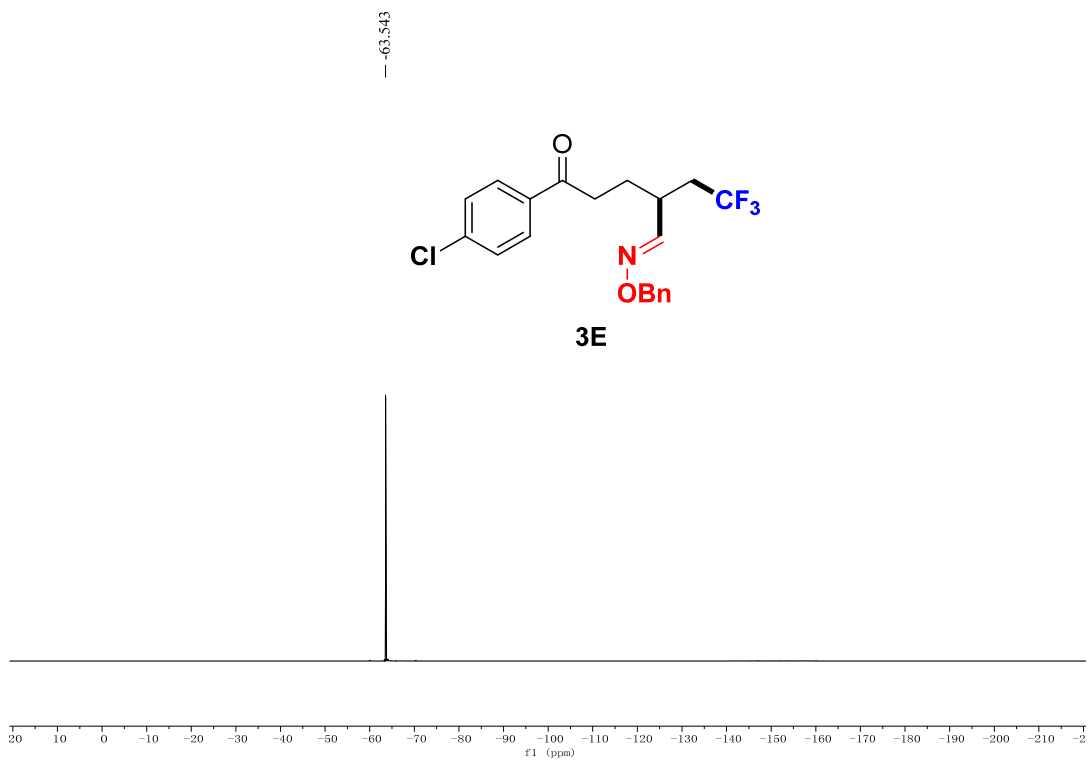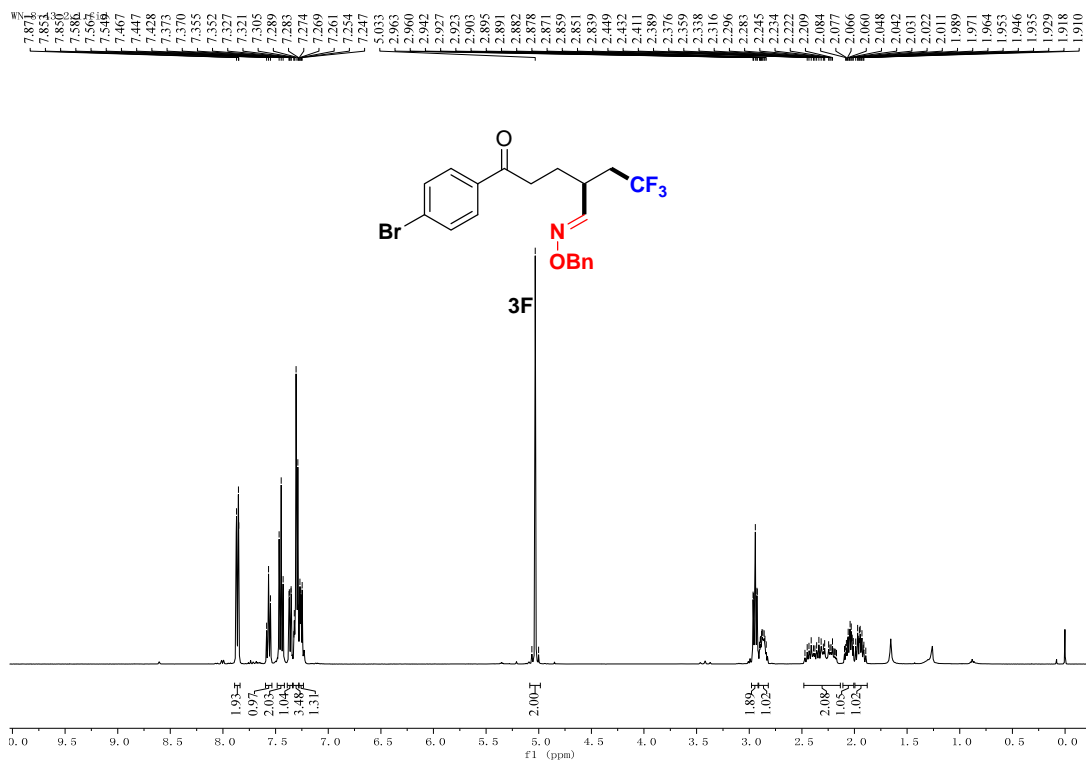

WN-8-10-Q-1-NEW.2.fid

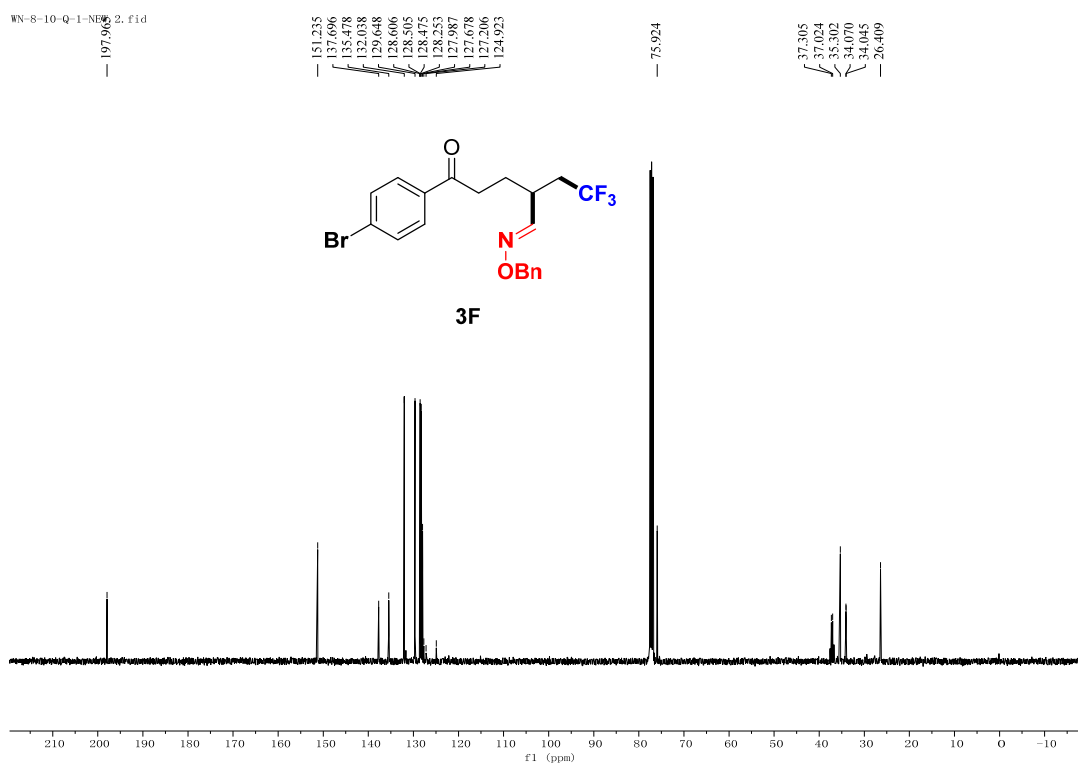

WN-8-10-Q-1-NEW.3.fid

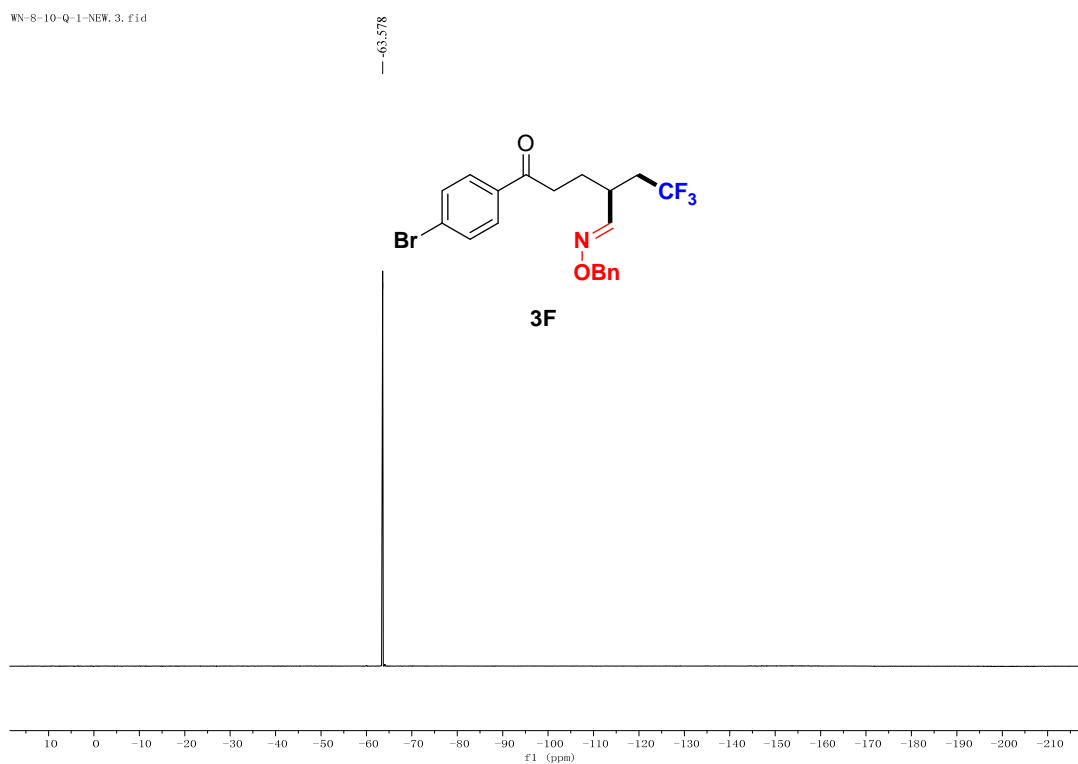

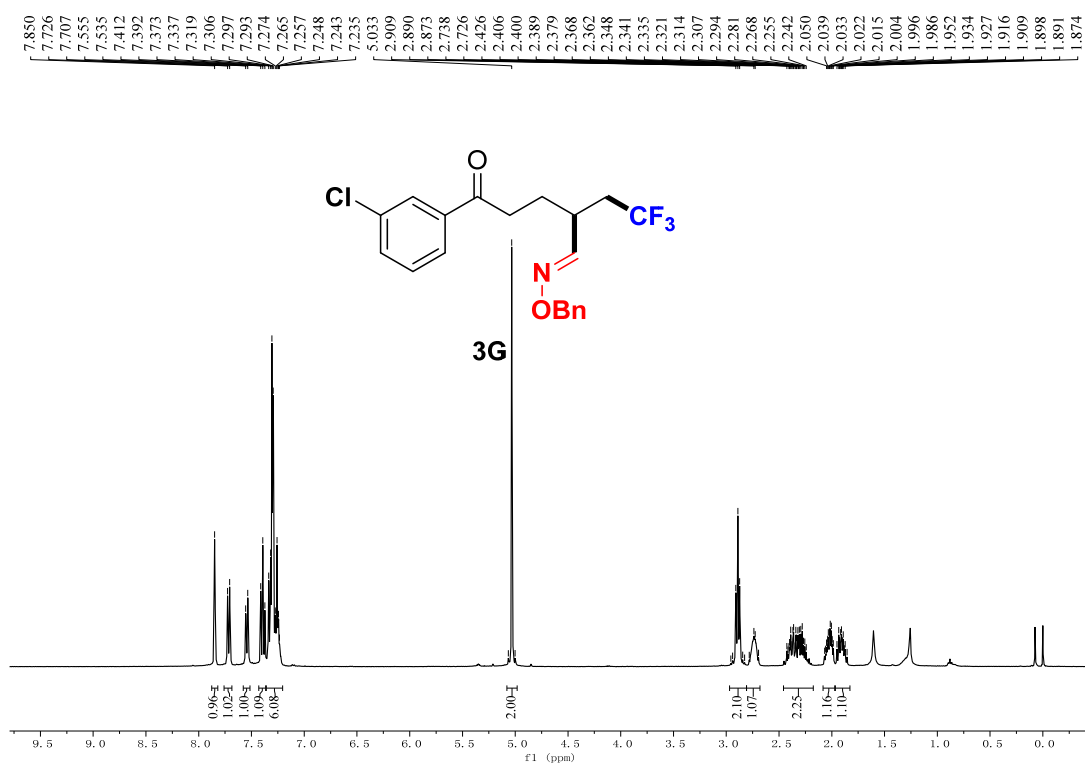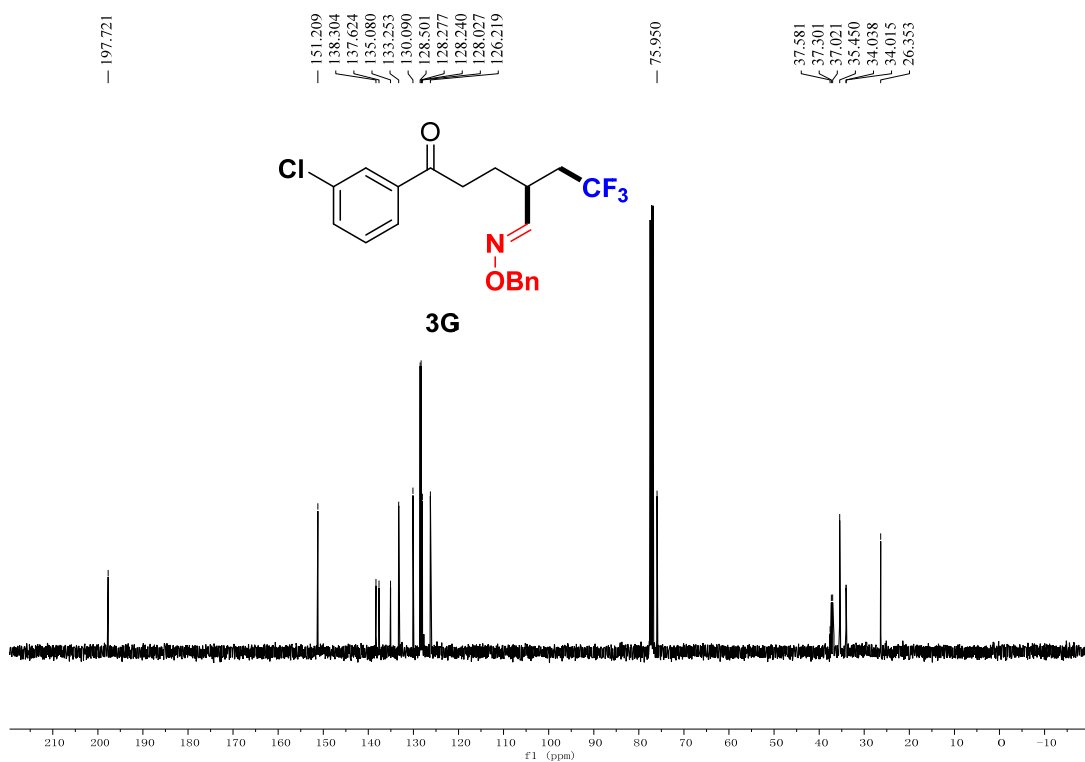

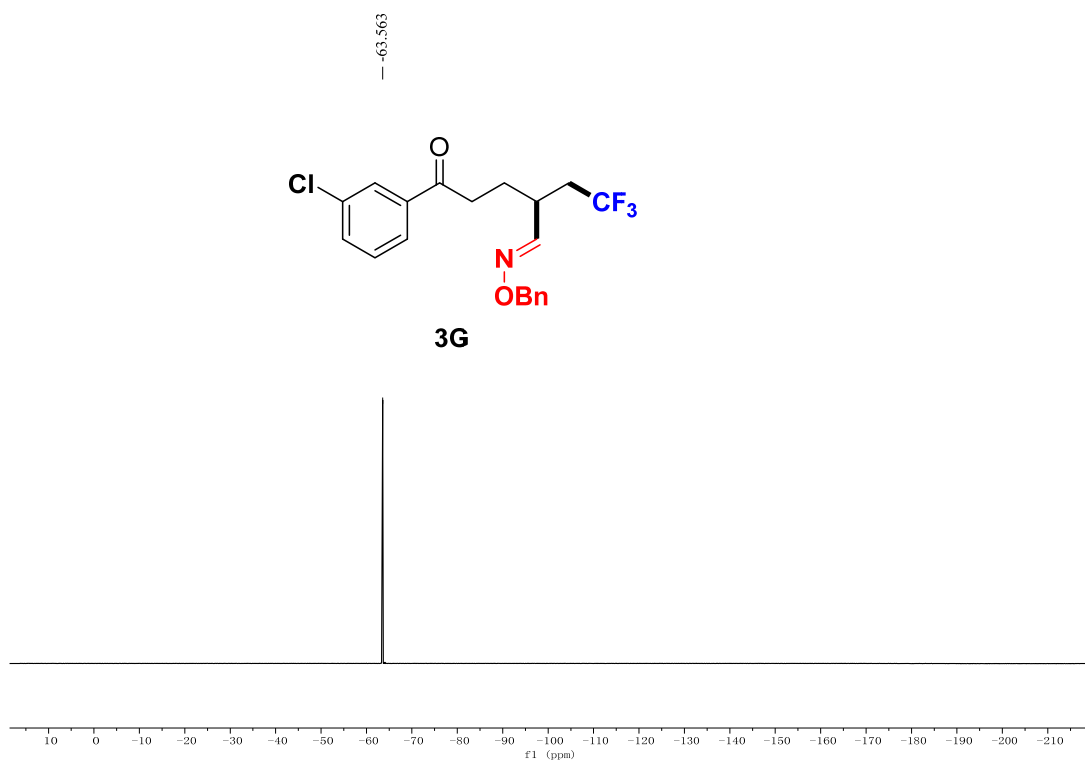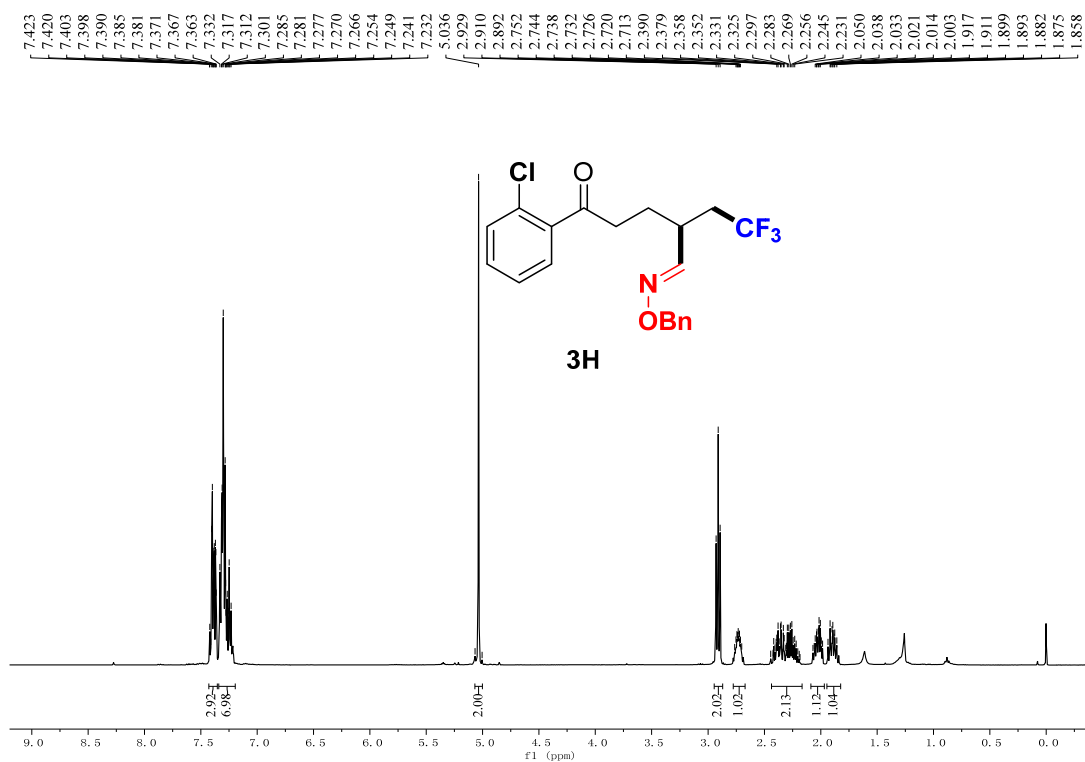

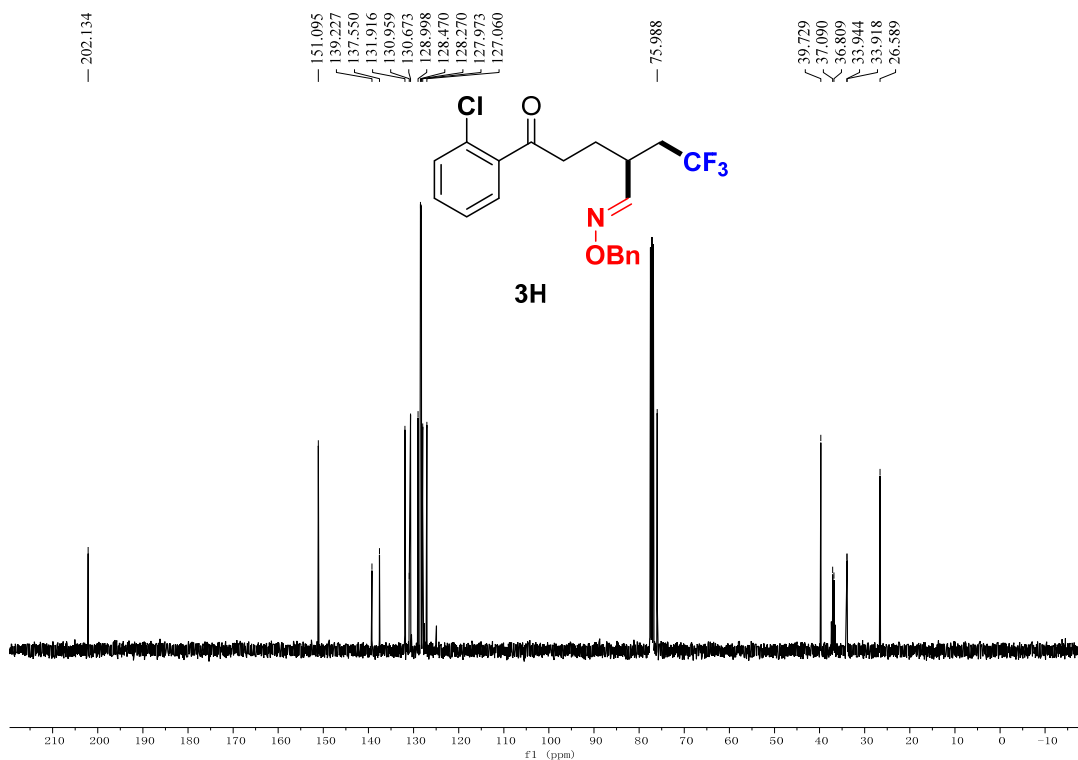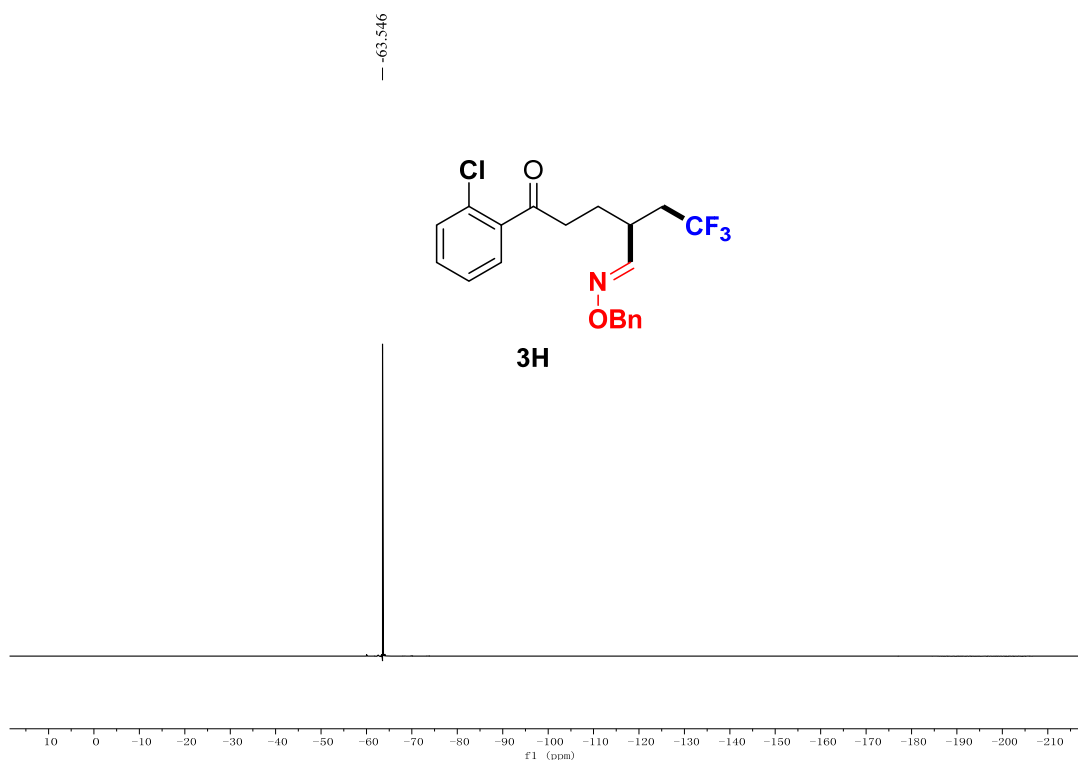

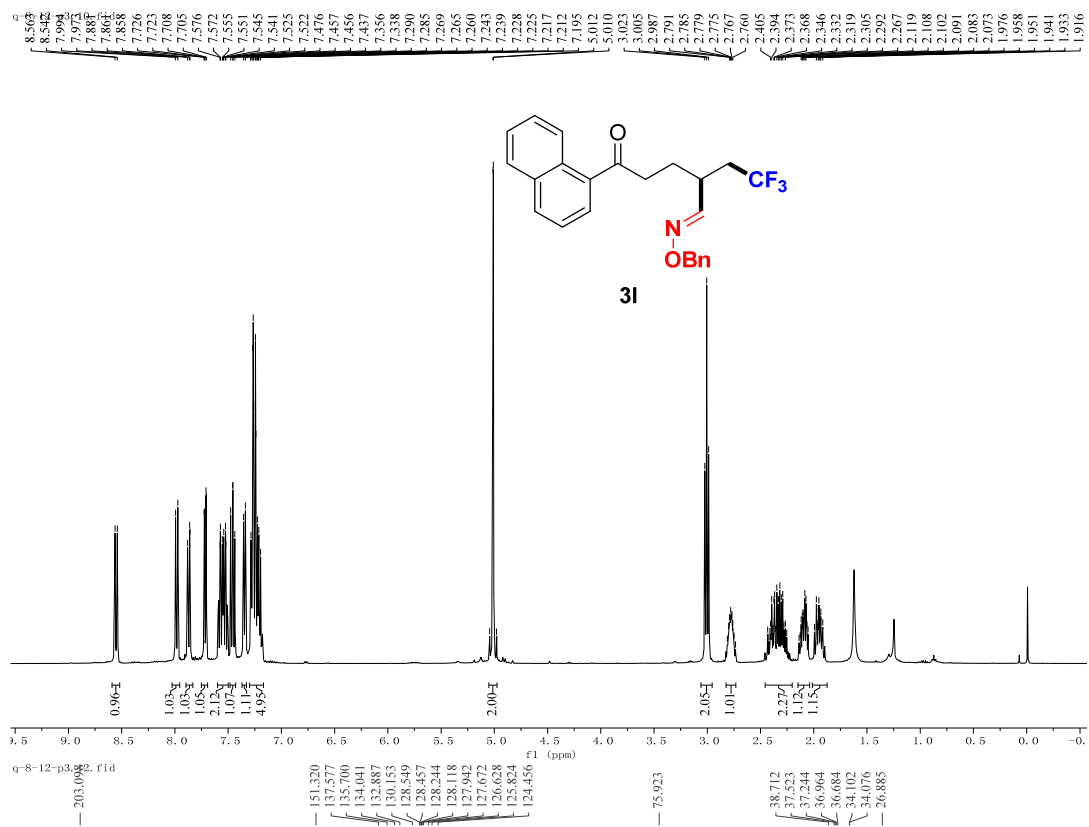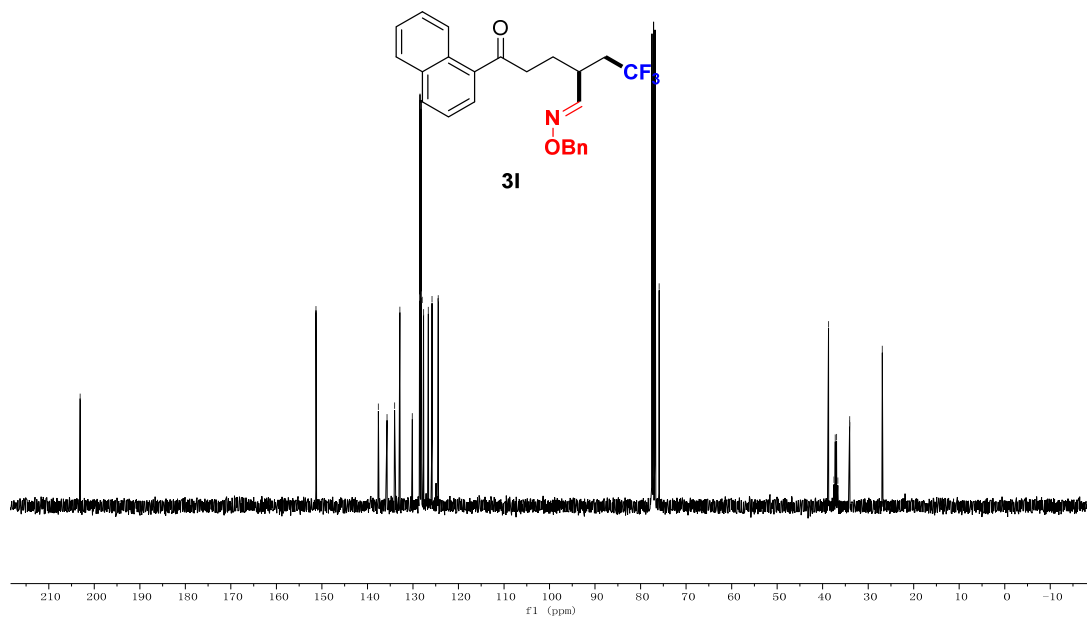

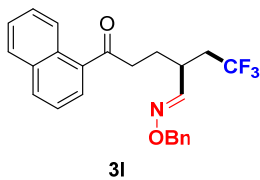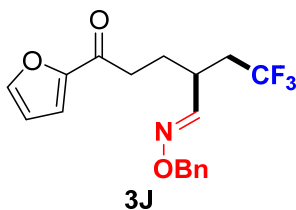

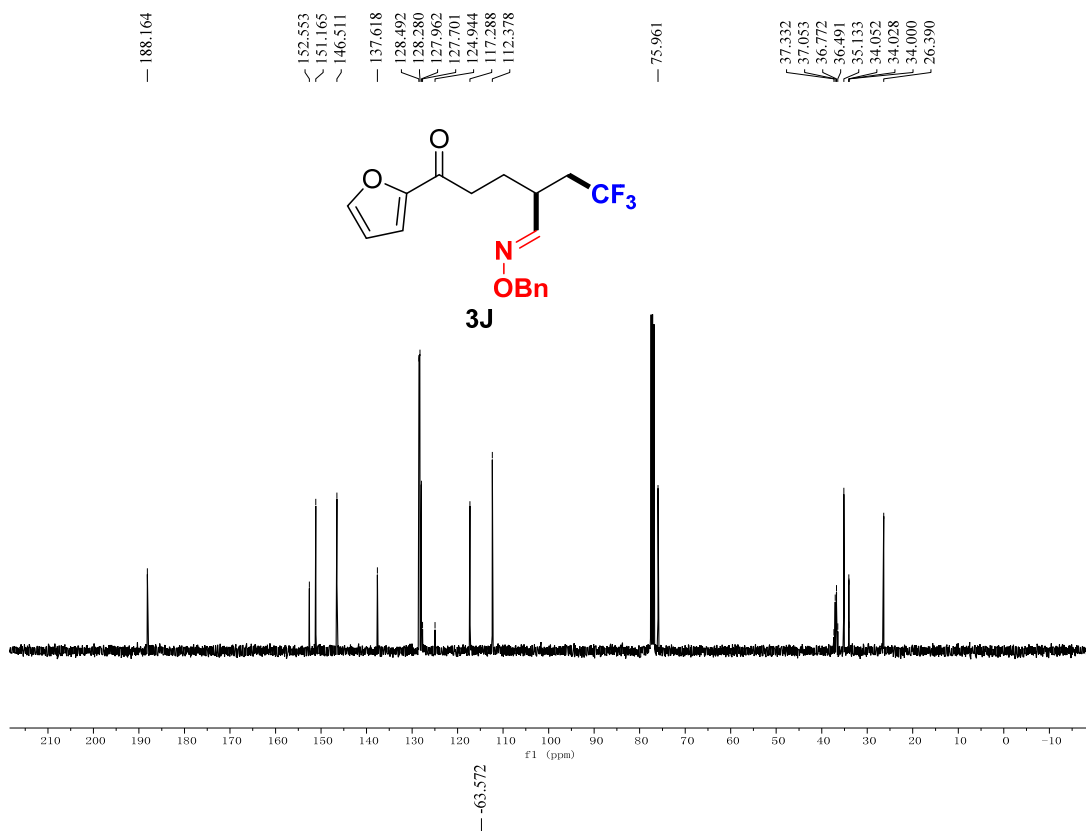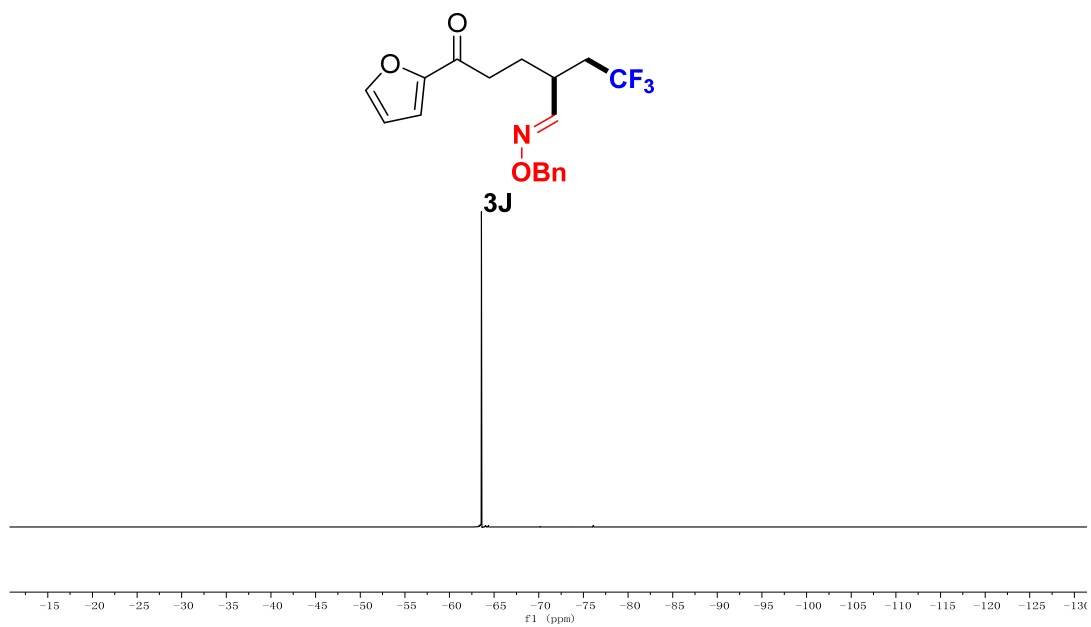

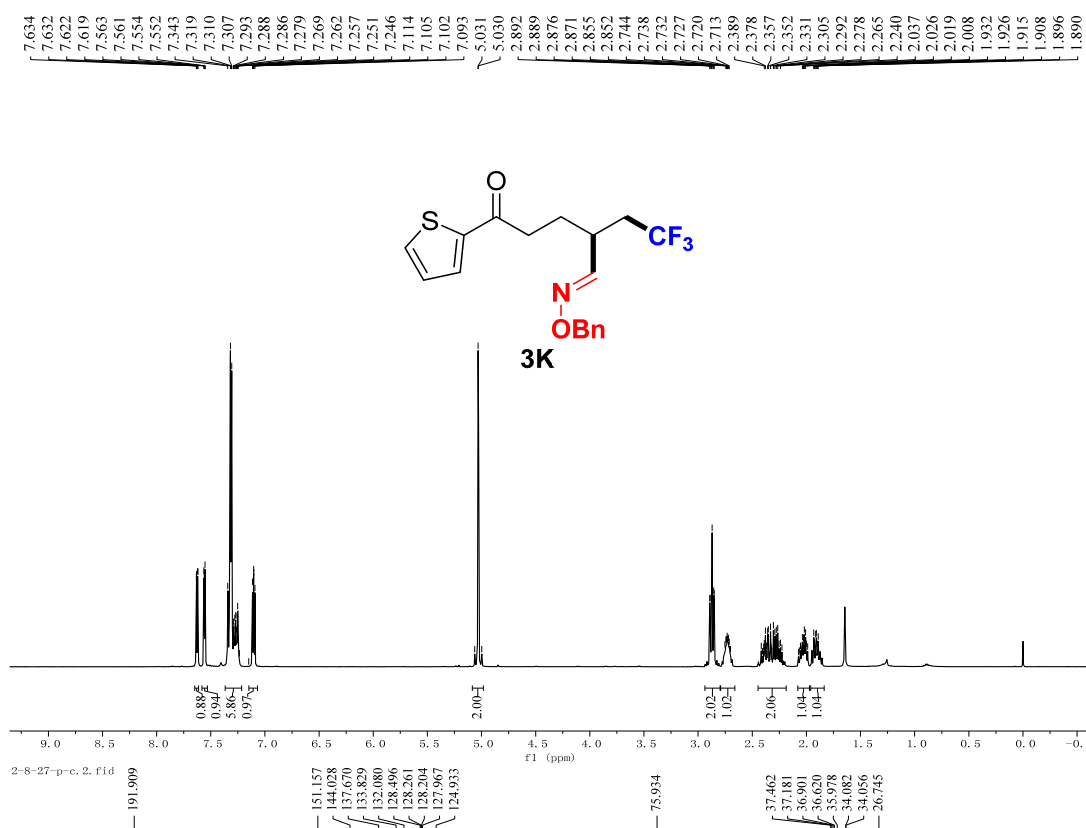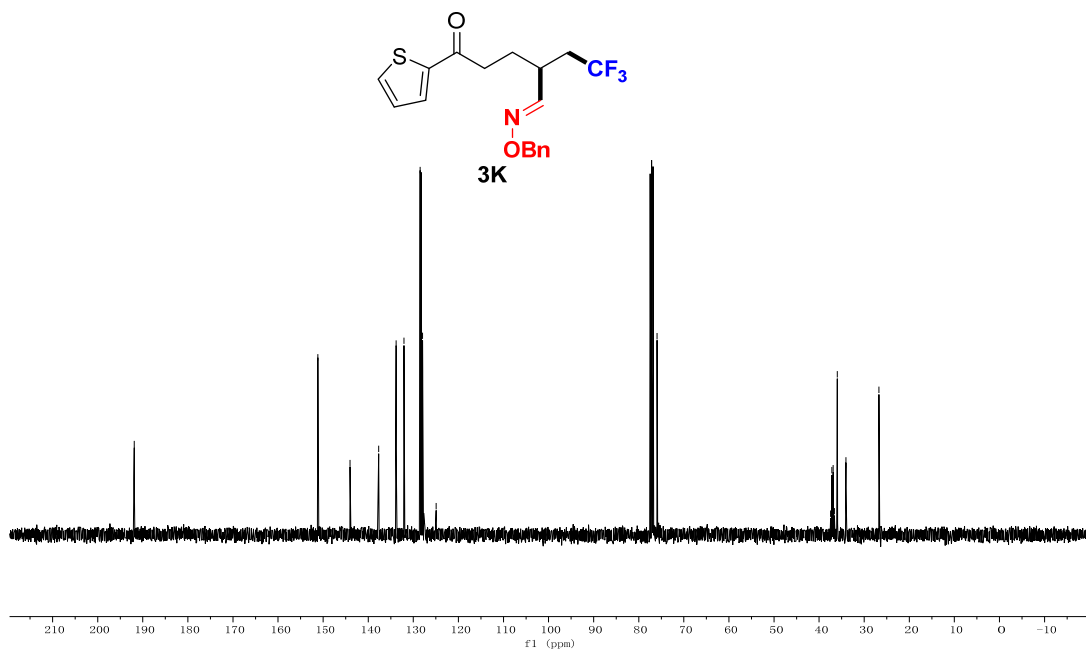

2-8-27-p-c, 1. f1d

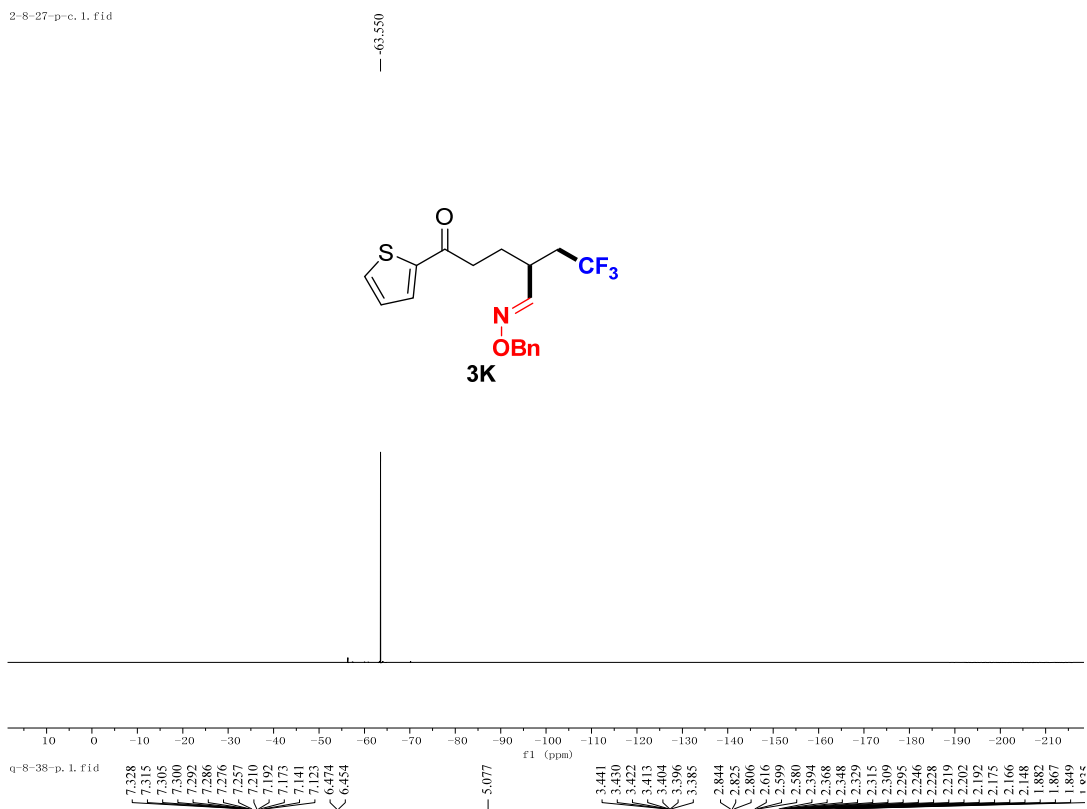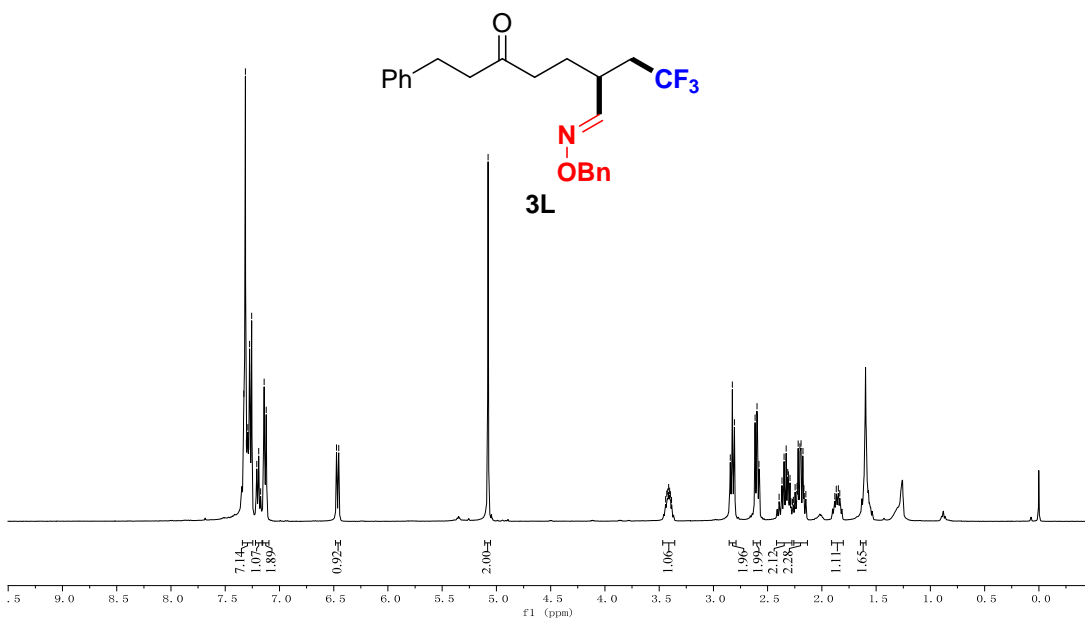

q-8-38-f, 11. fid

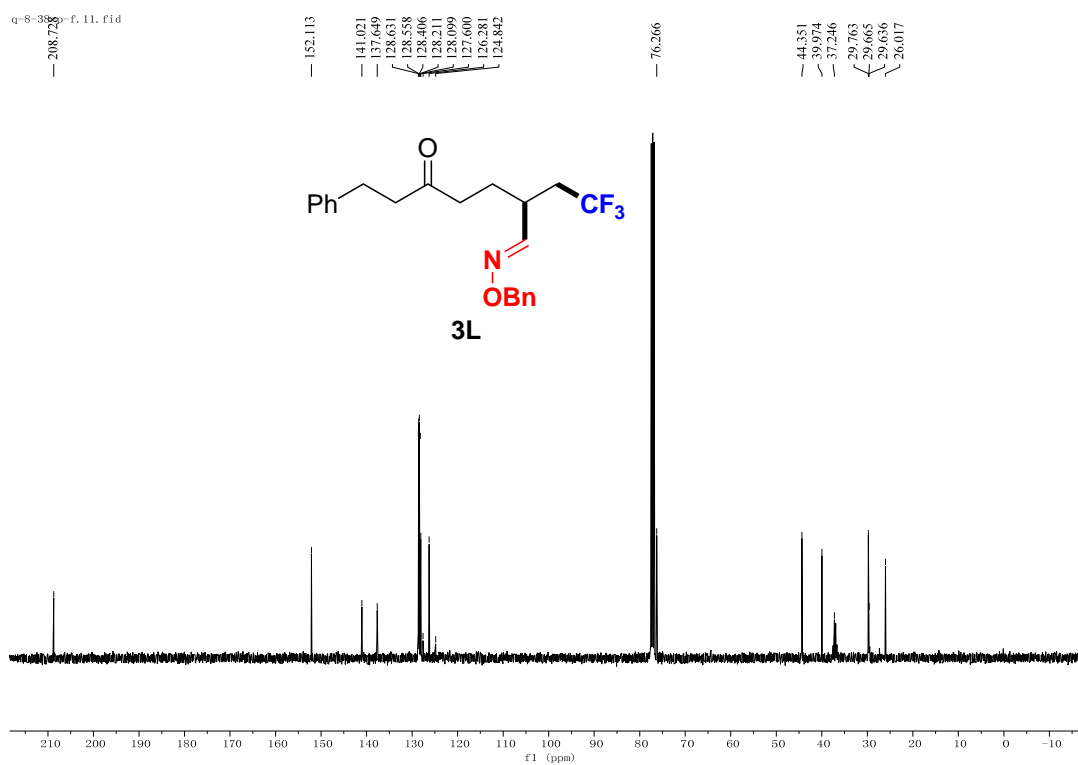

q-8-38-p, 4. fid

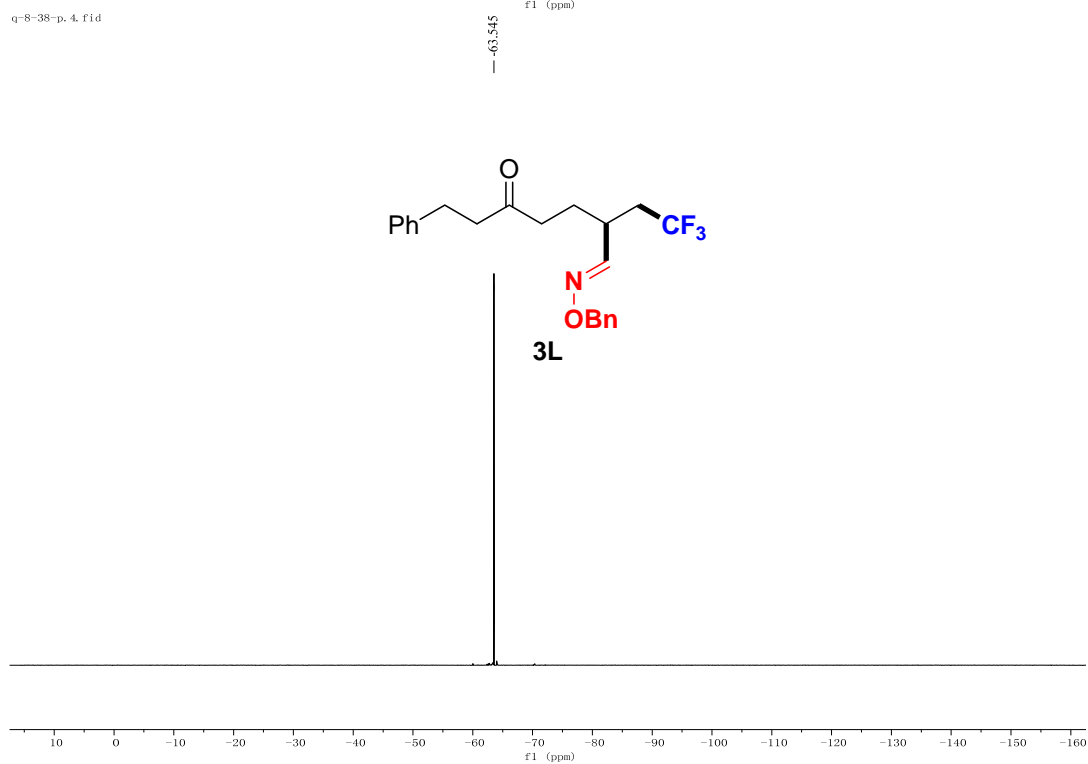

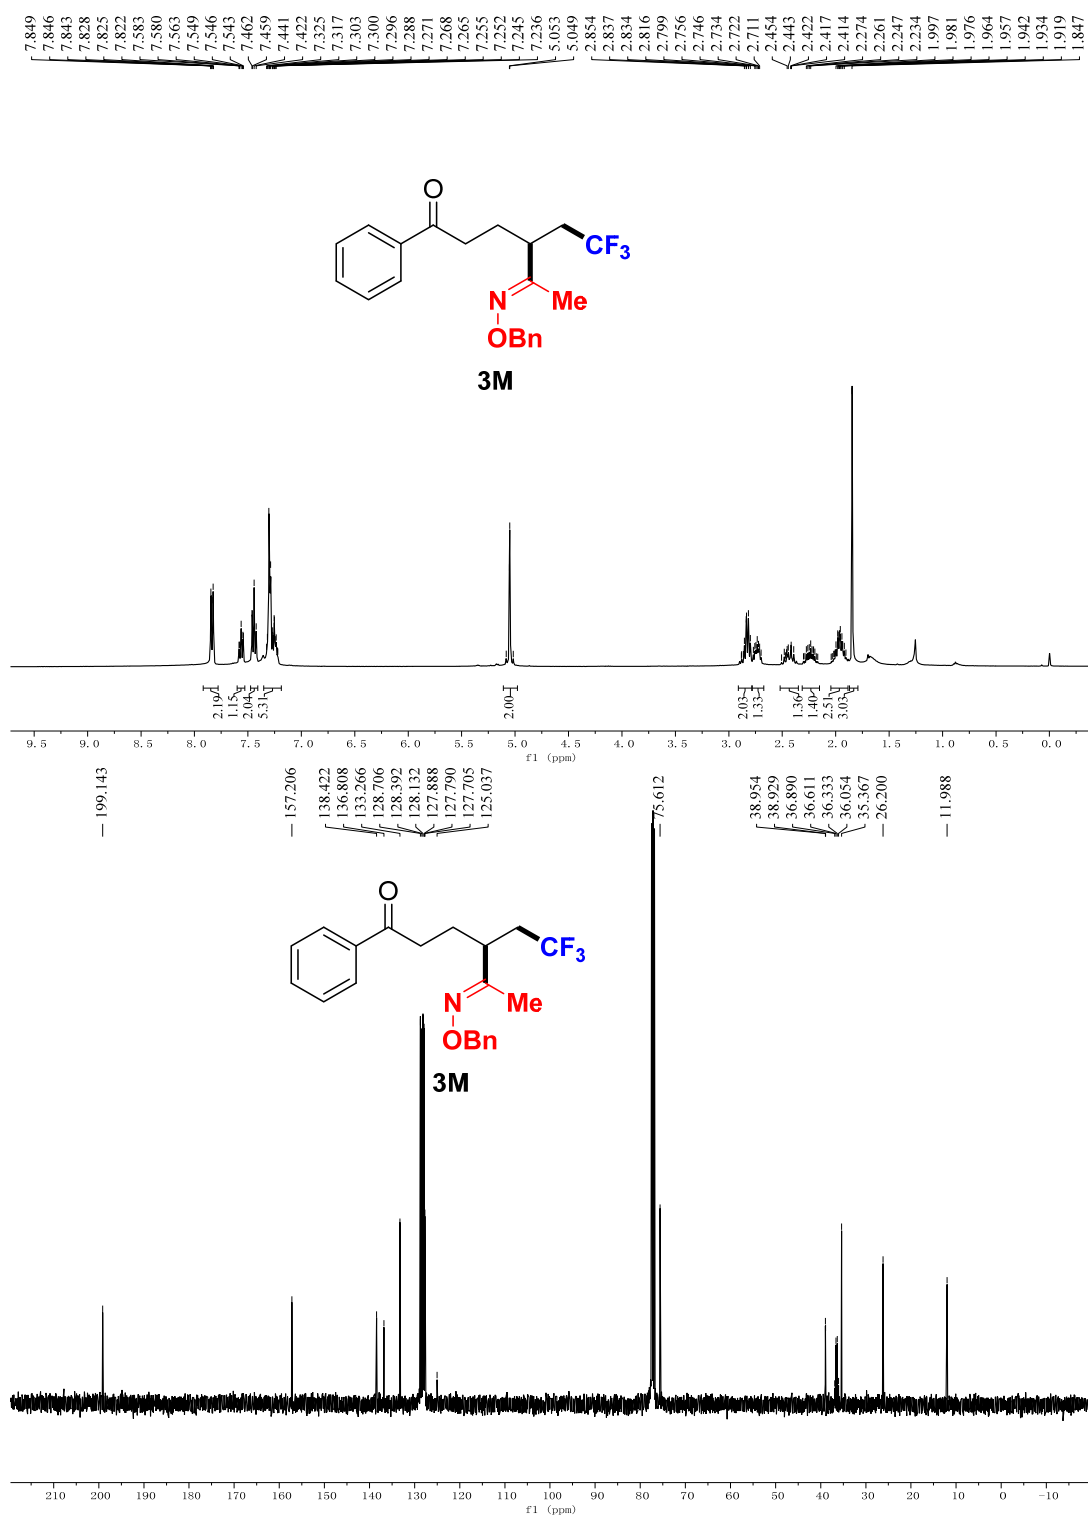

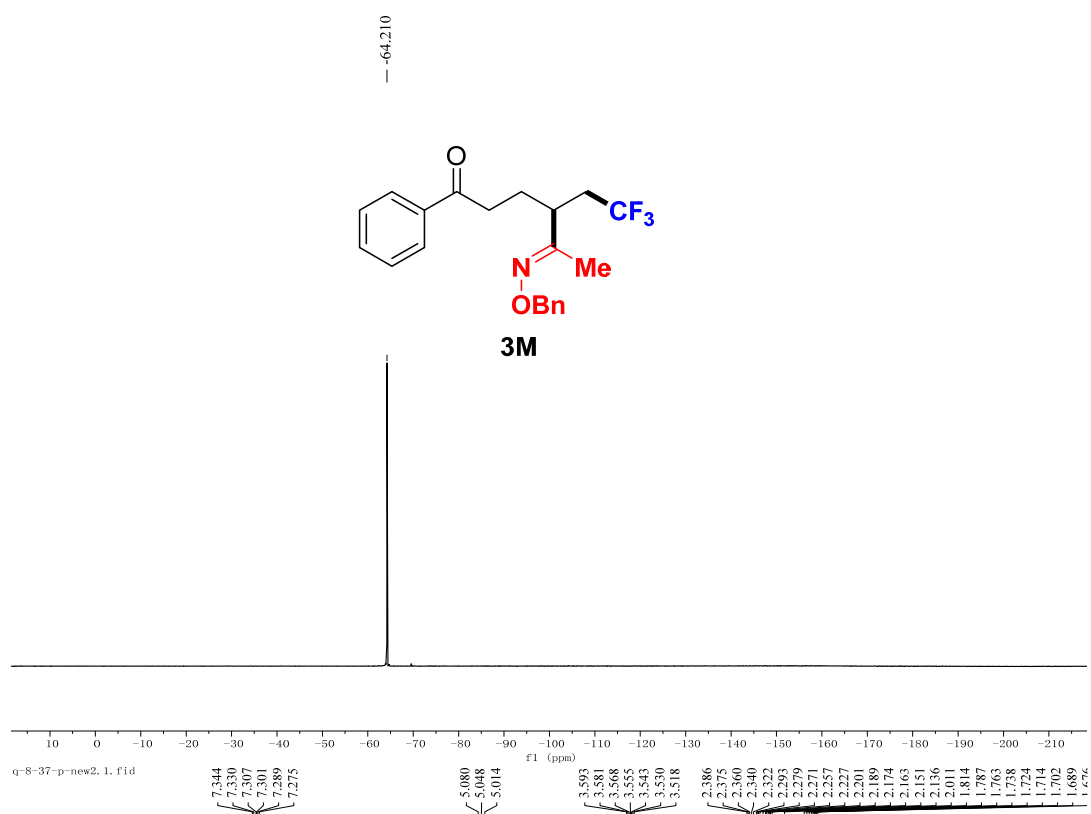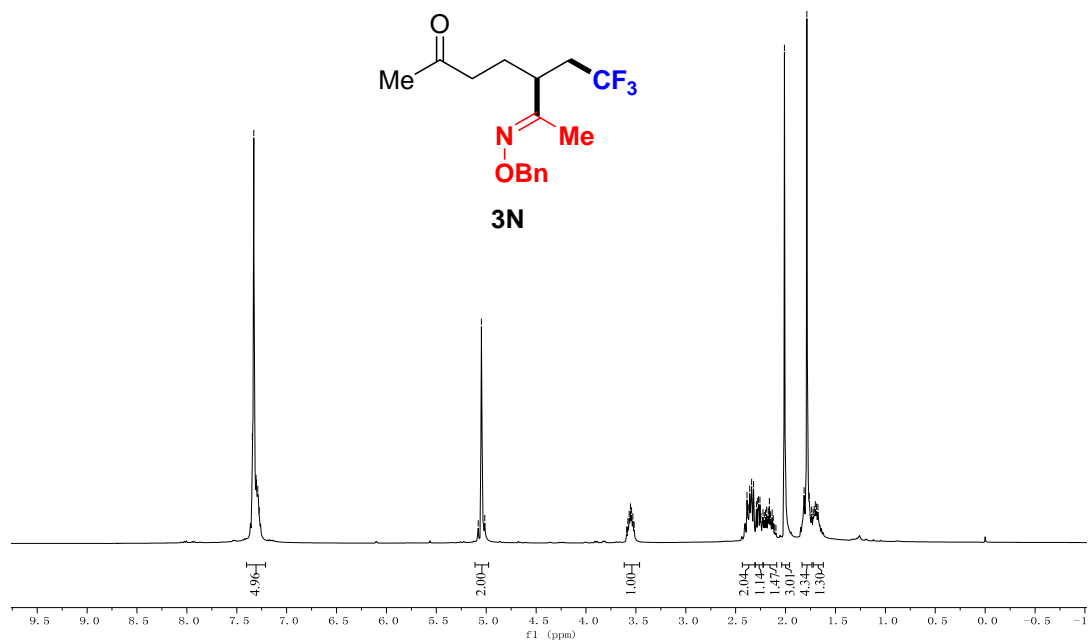

q-8-37-new2, 4, f1d

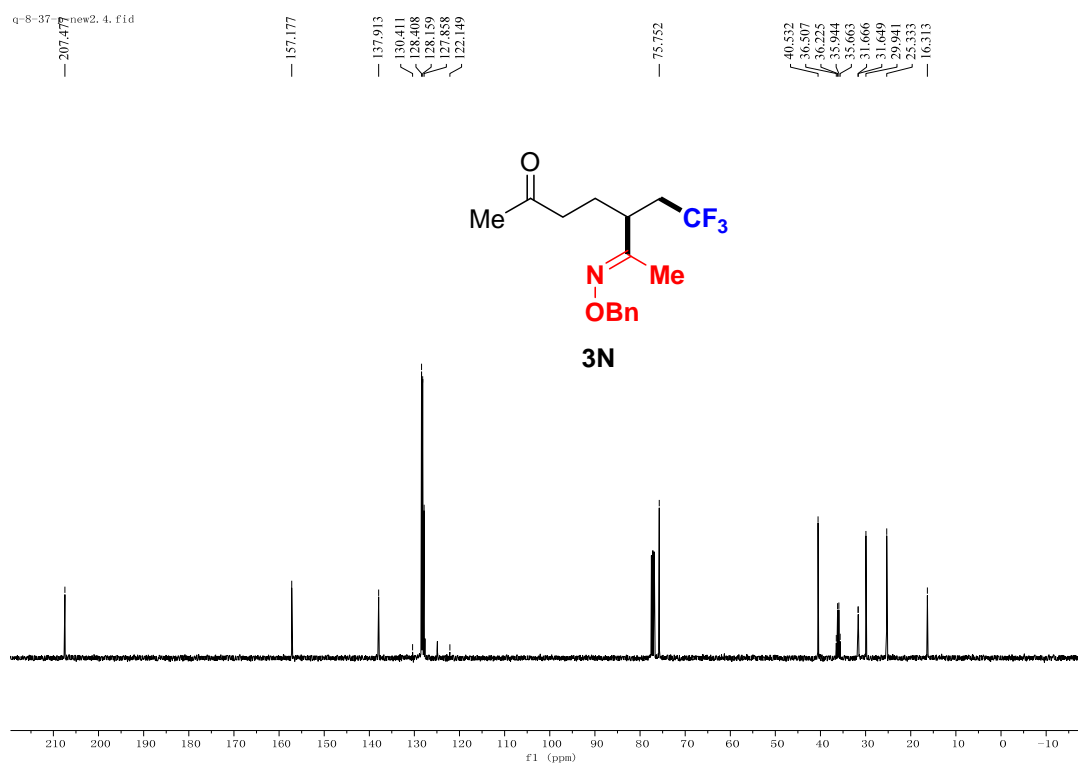

q-8-37-p-new2, 3, f1d

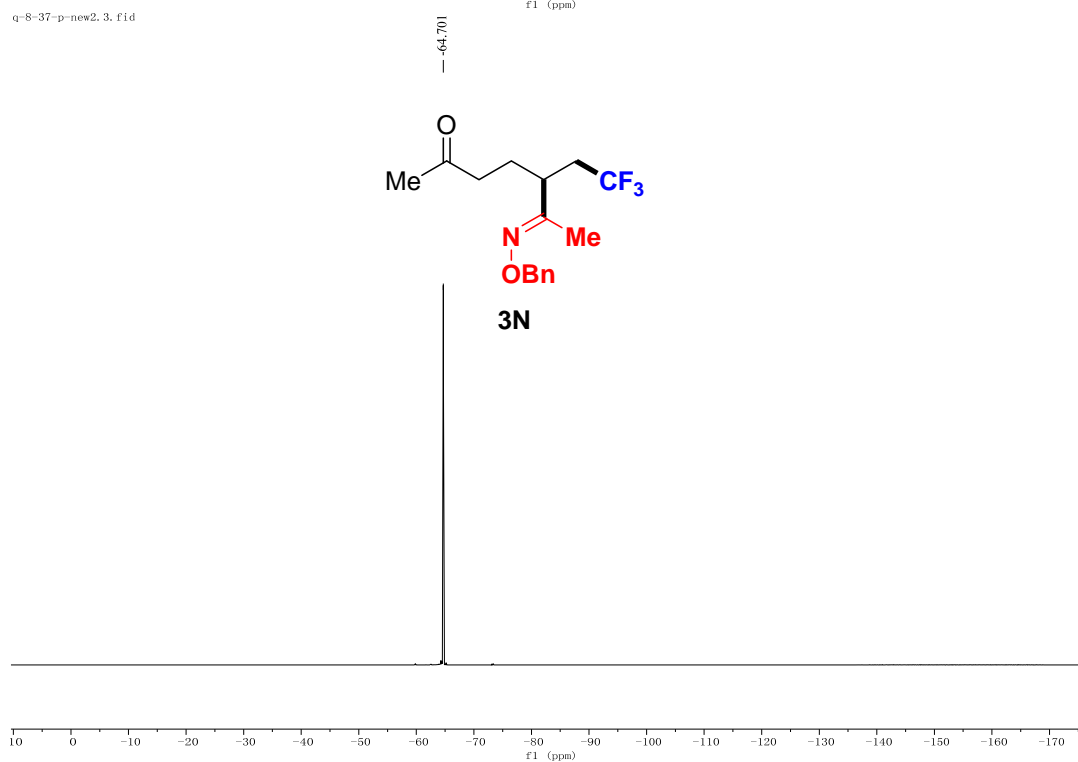

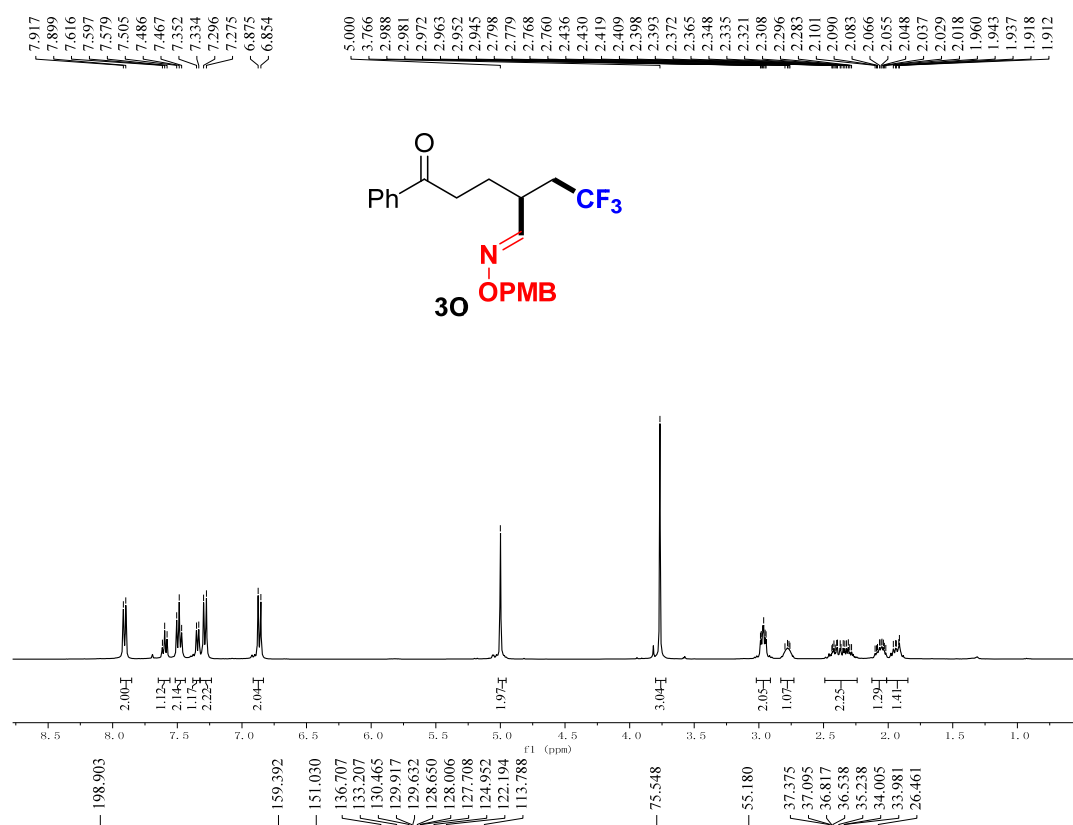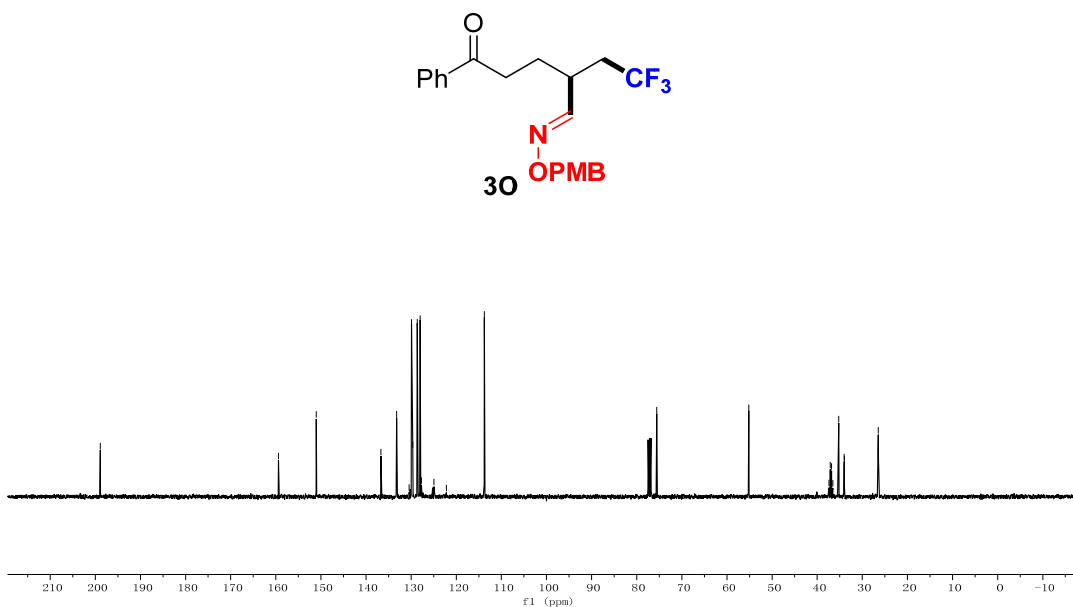

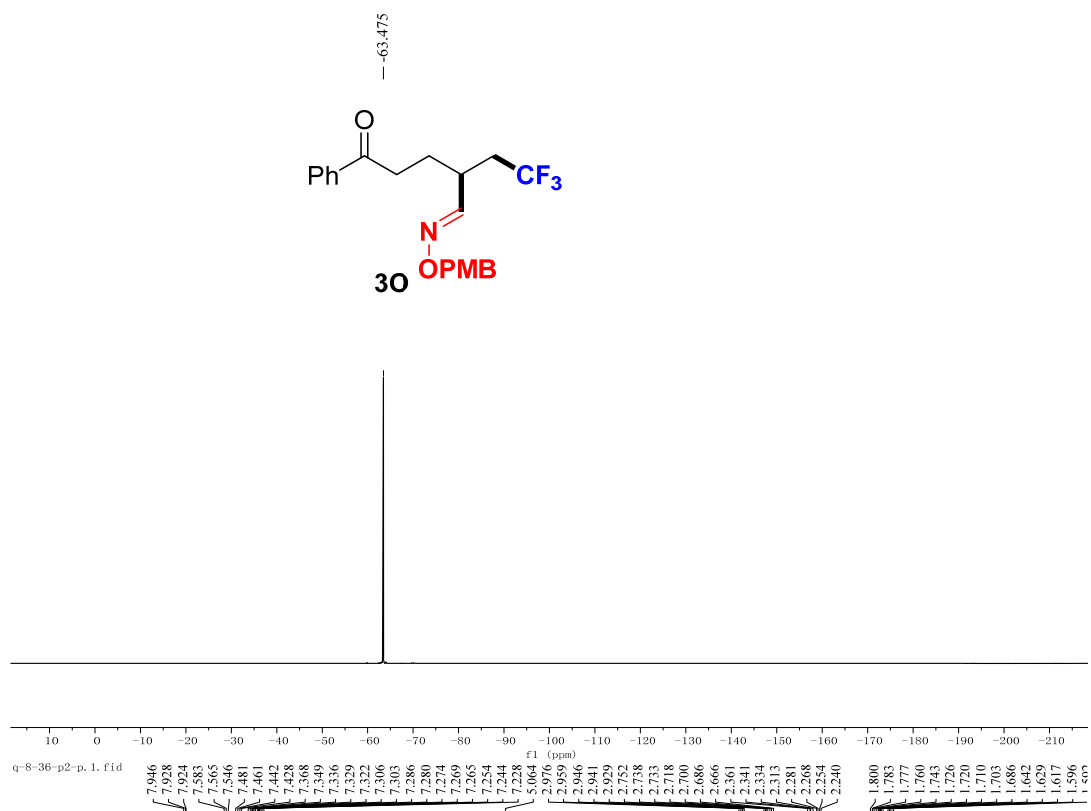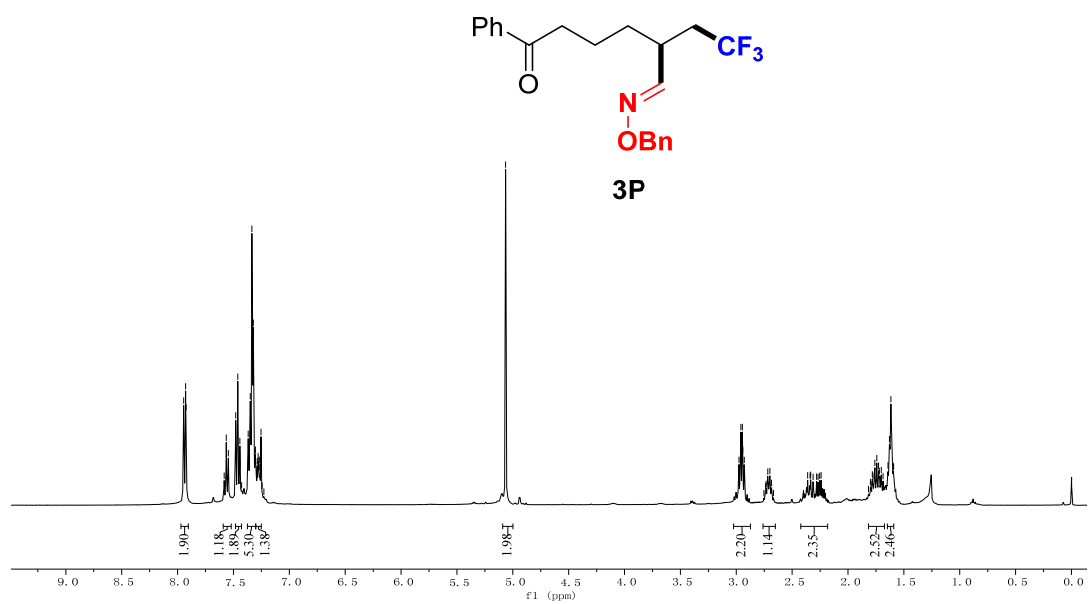

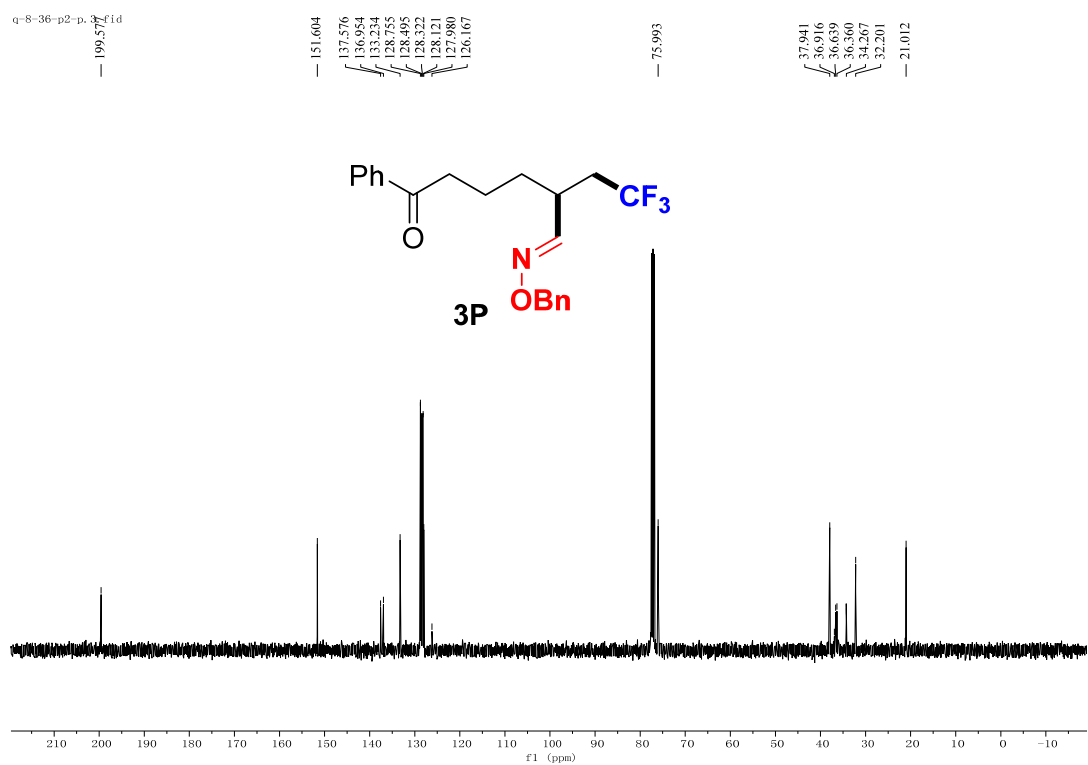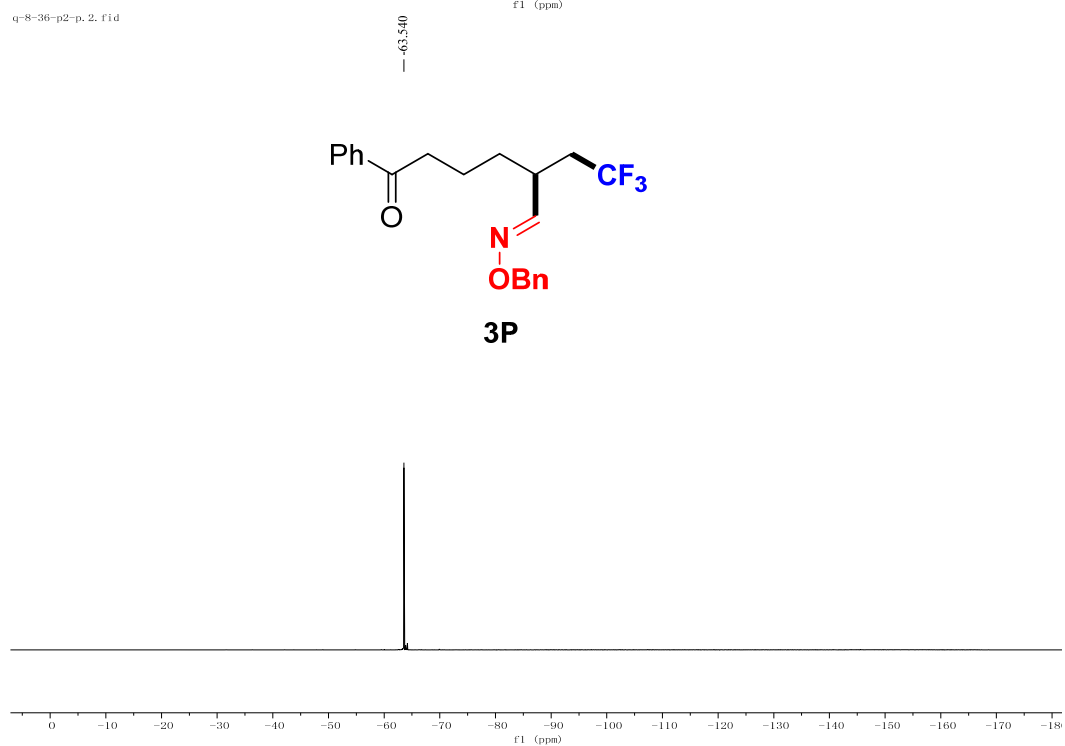

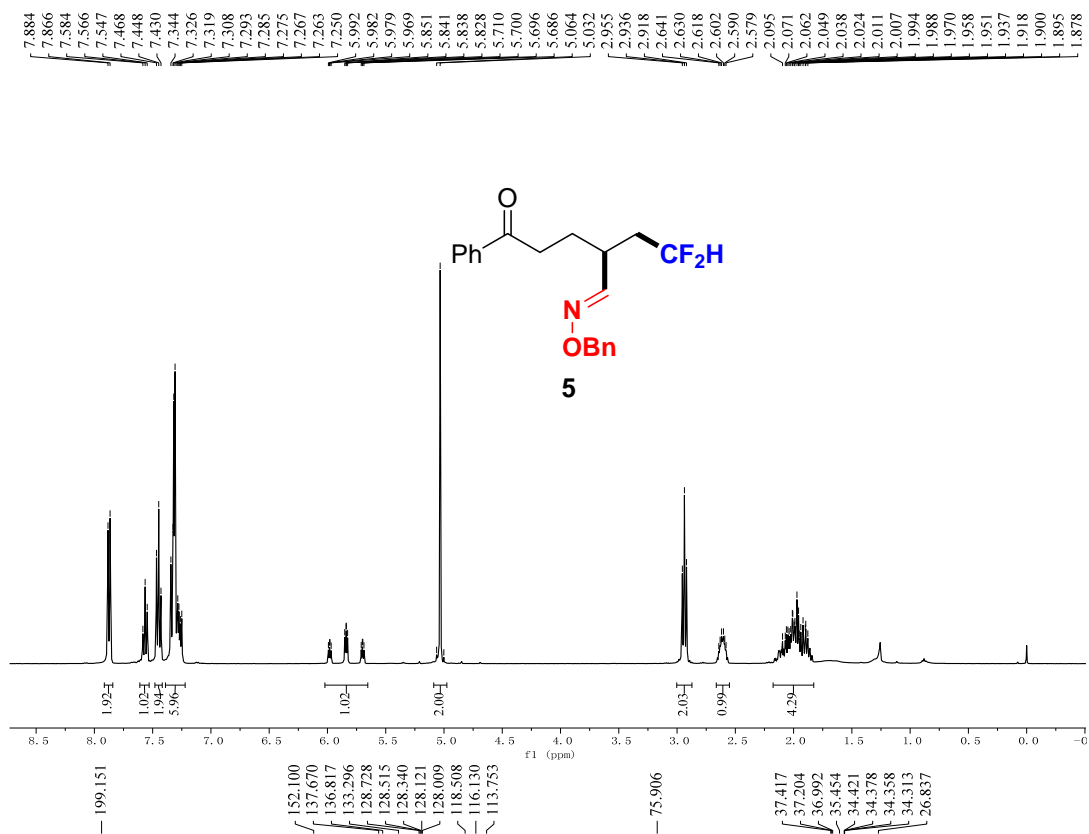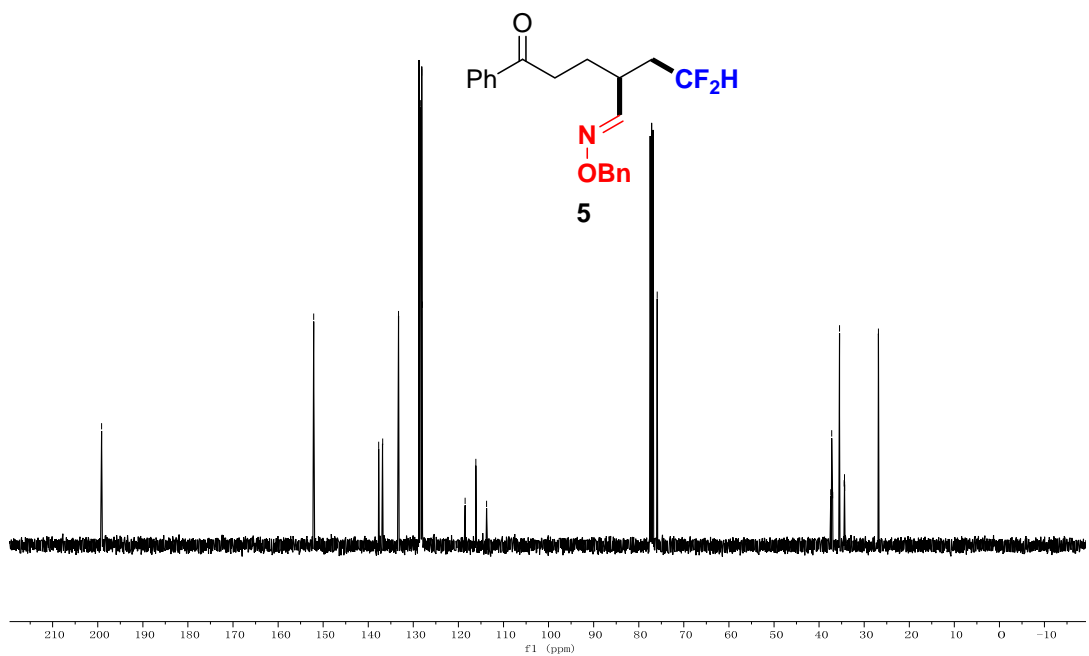

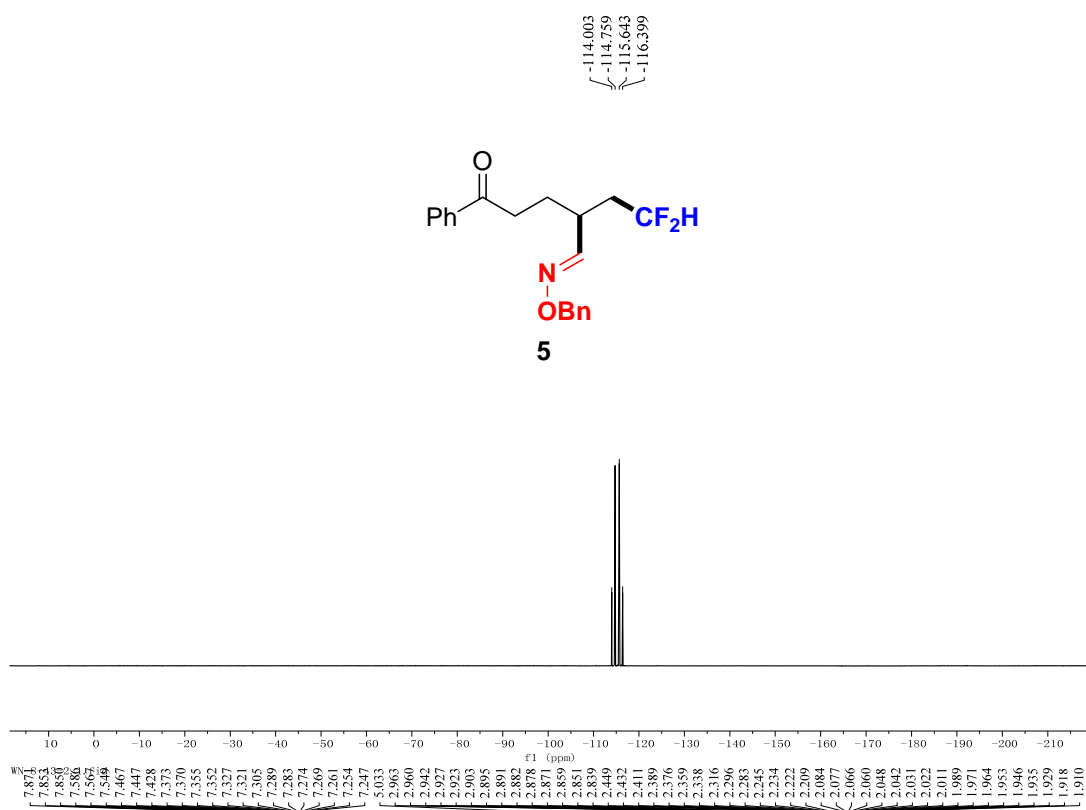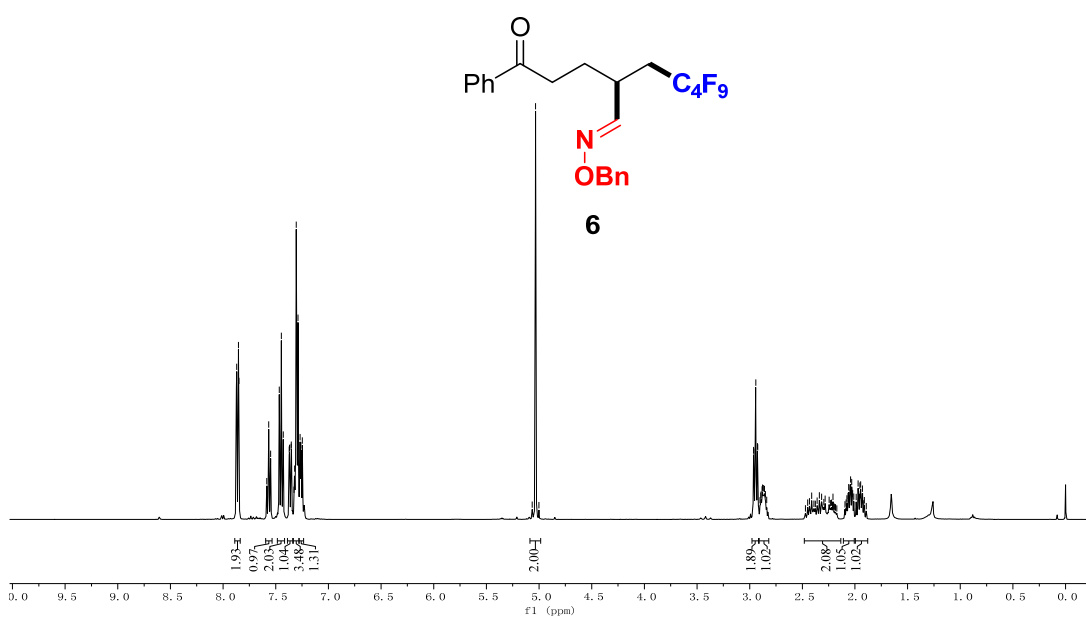

q-8-43-2-508-C. 2. fid

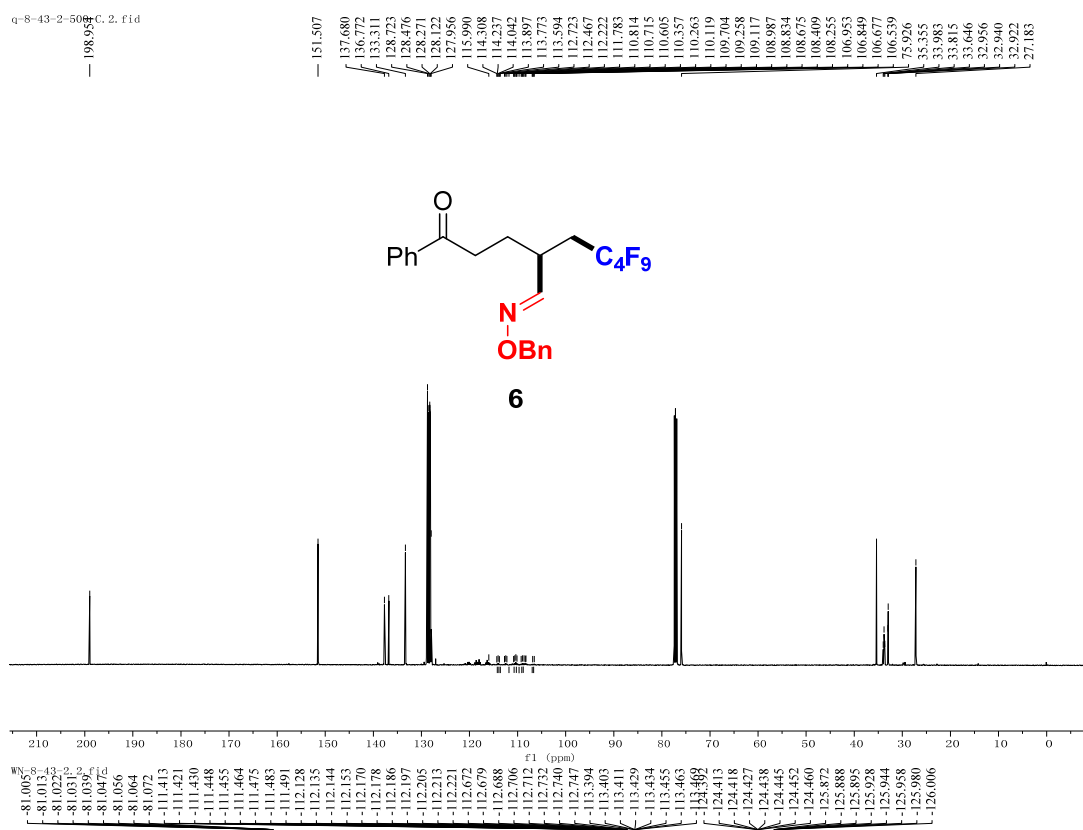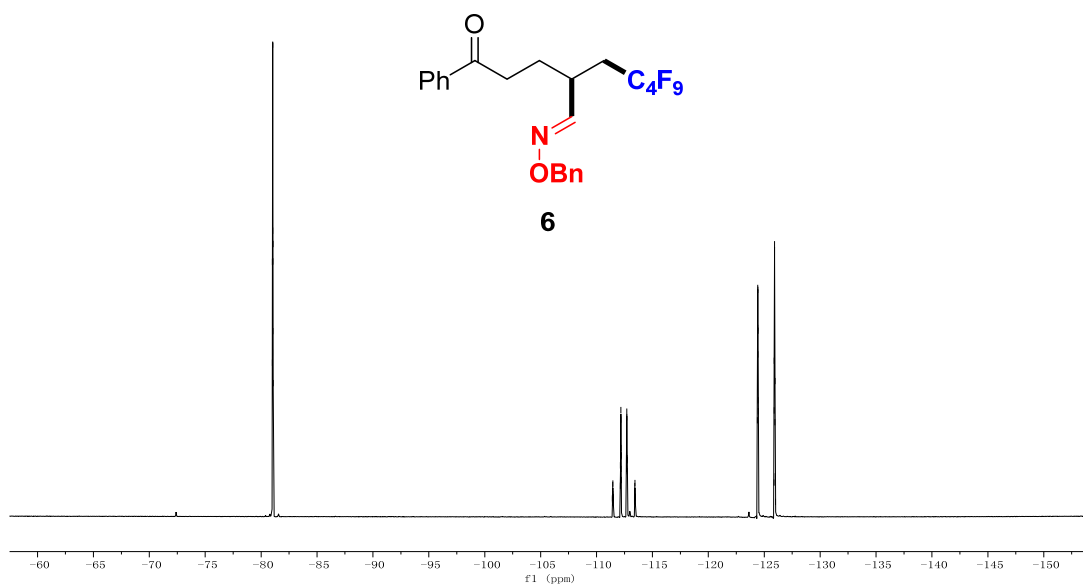

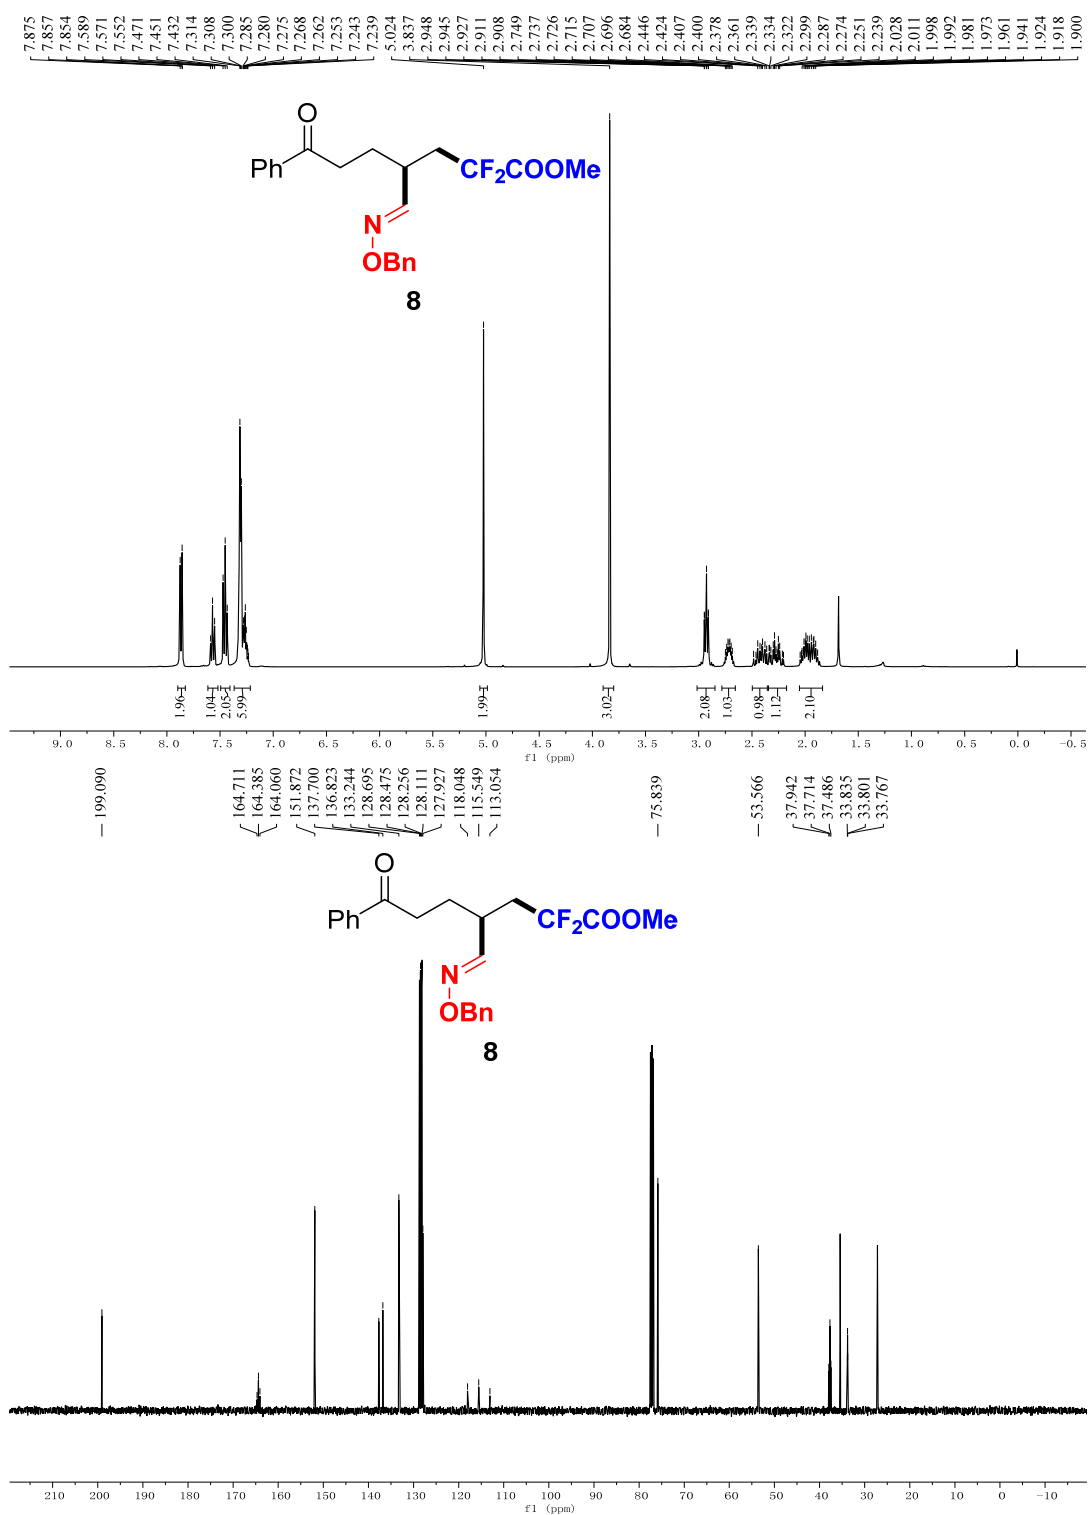

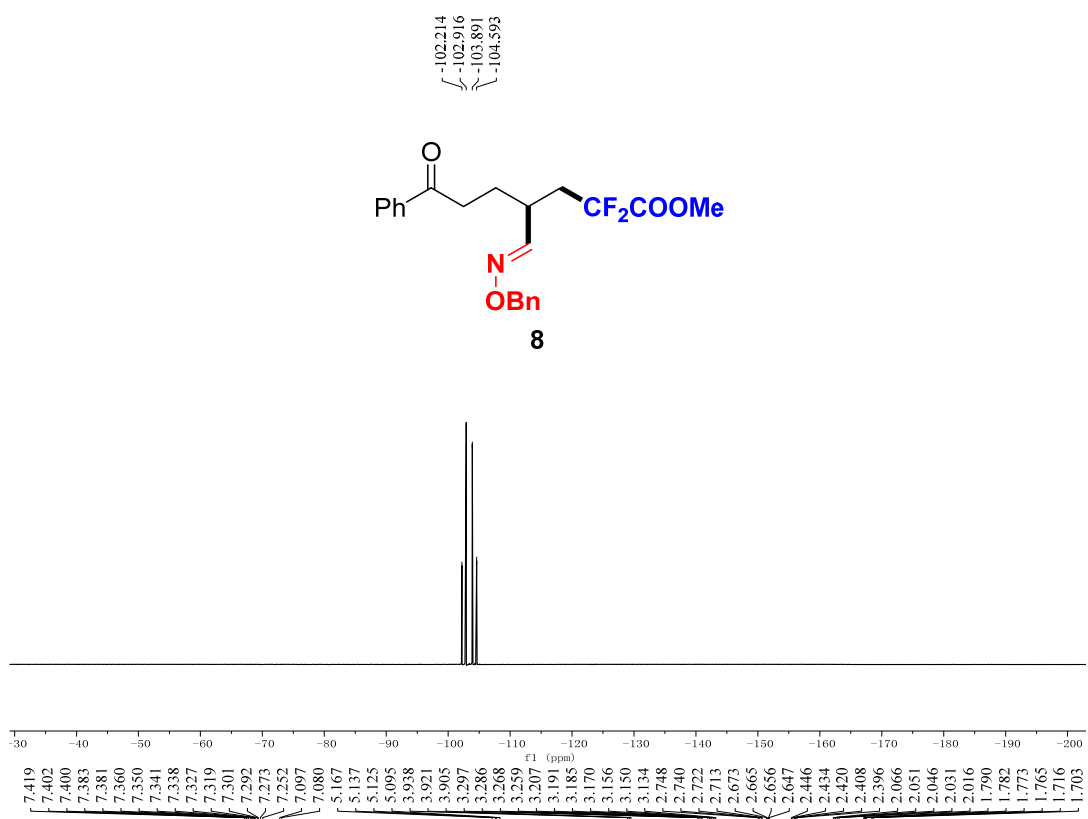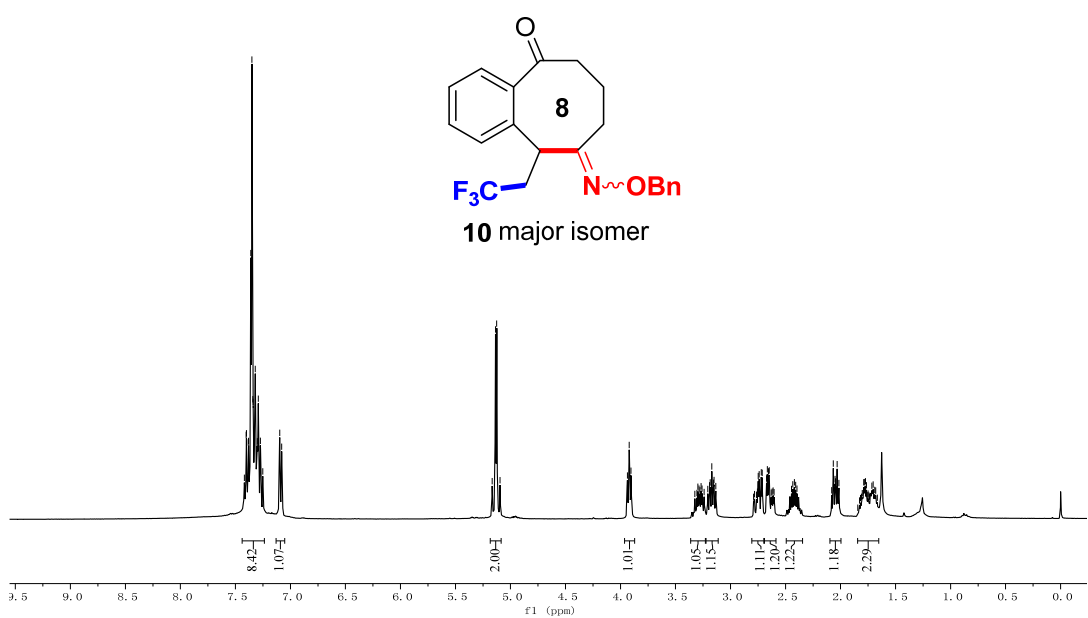

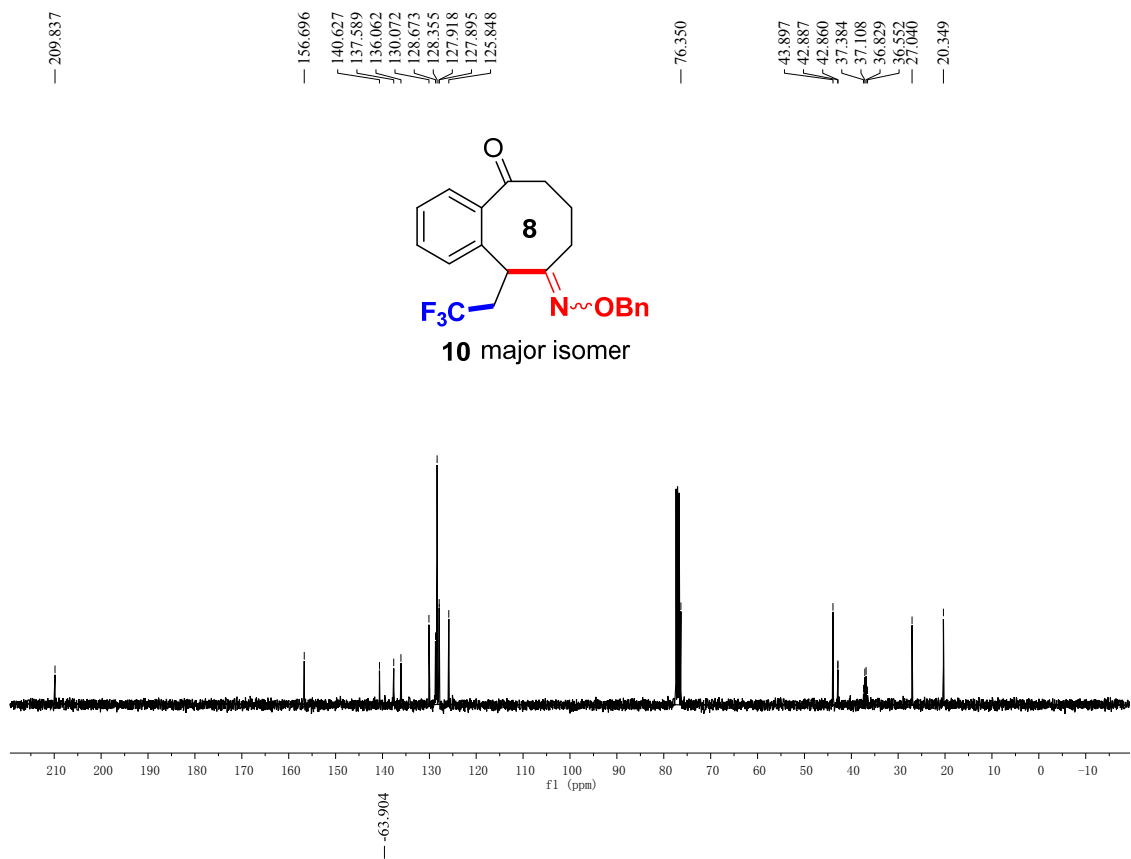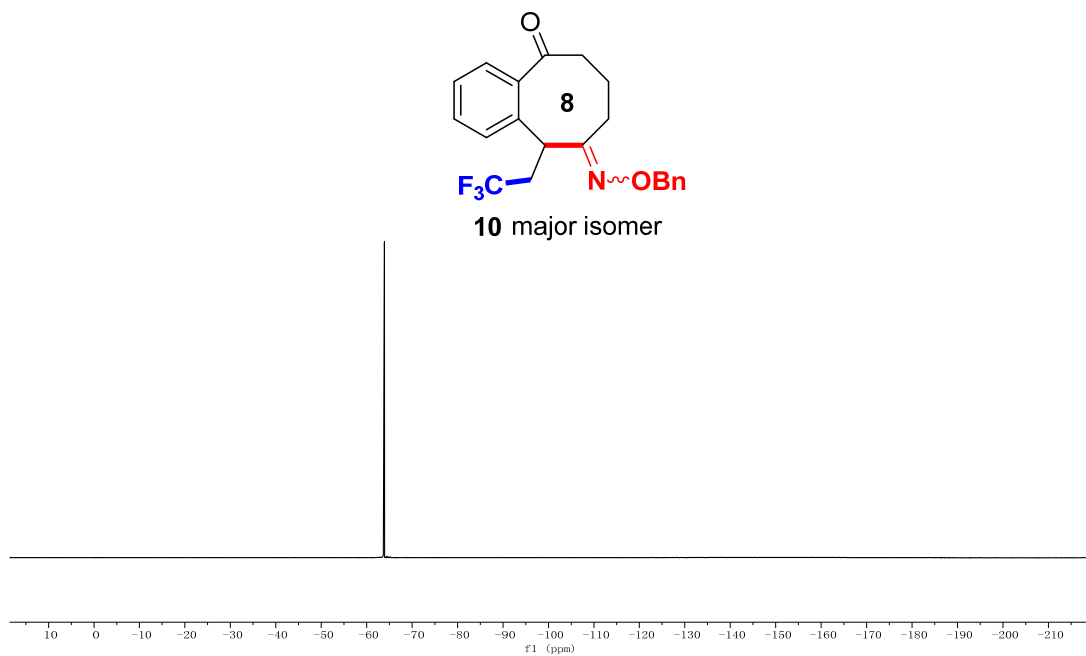

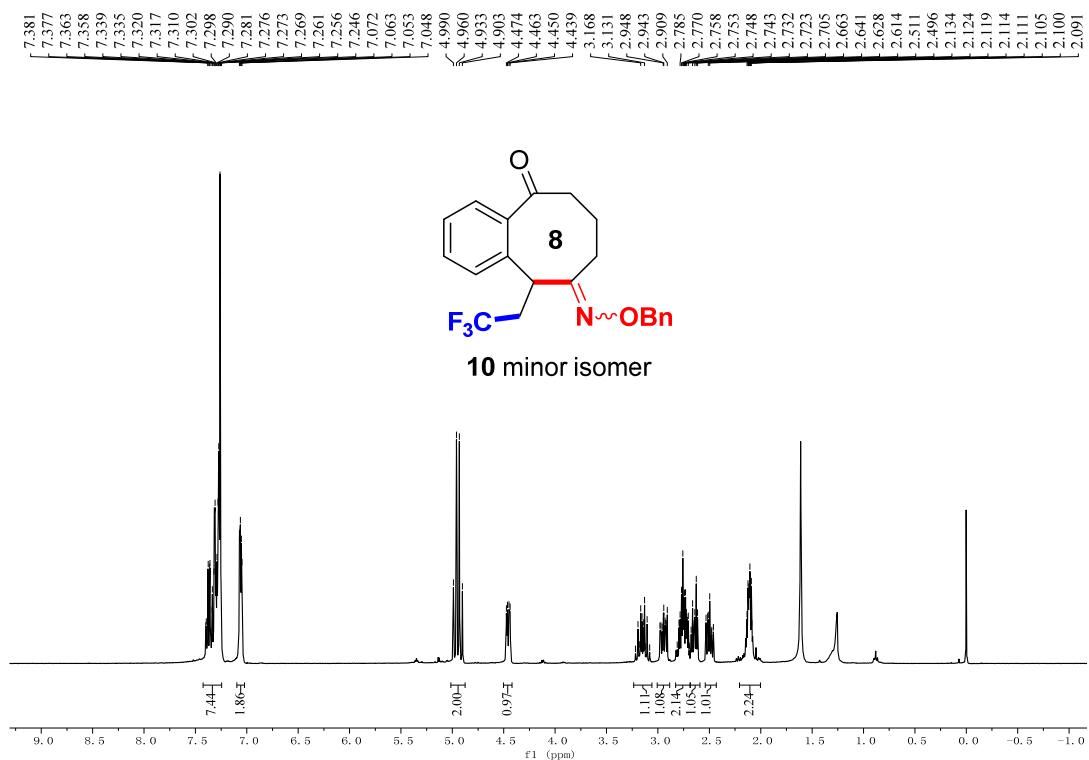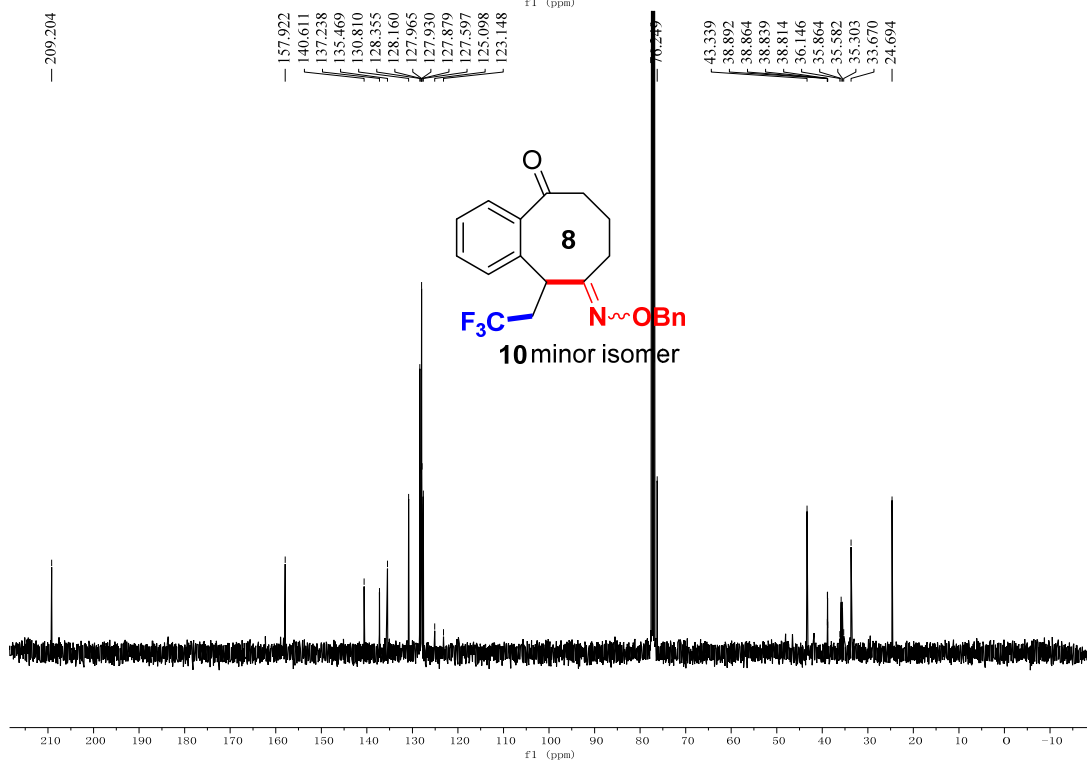

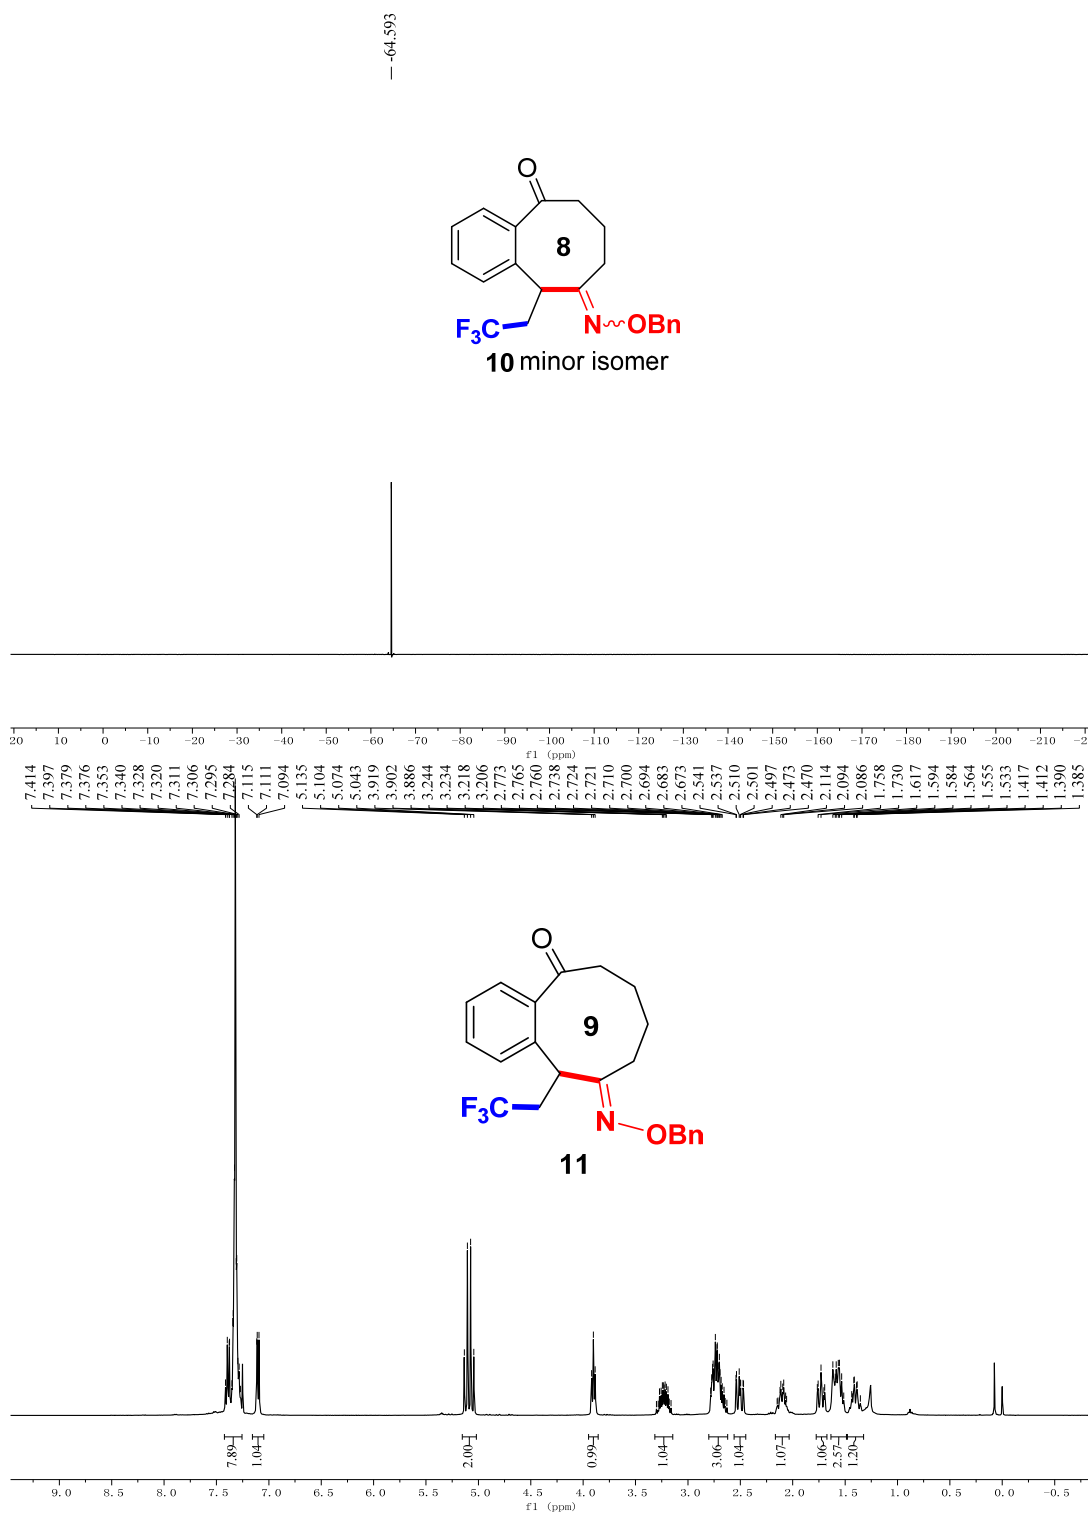

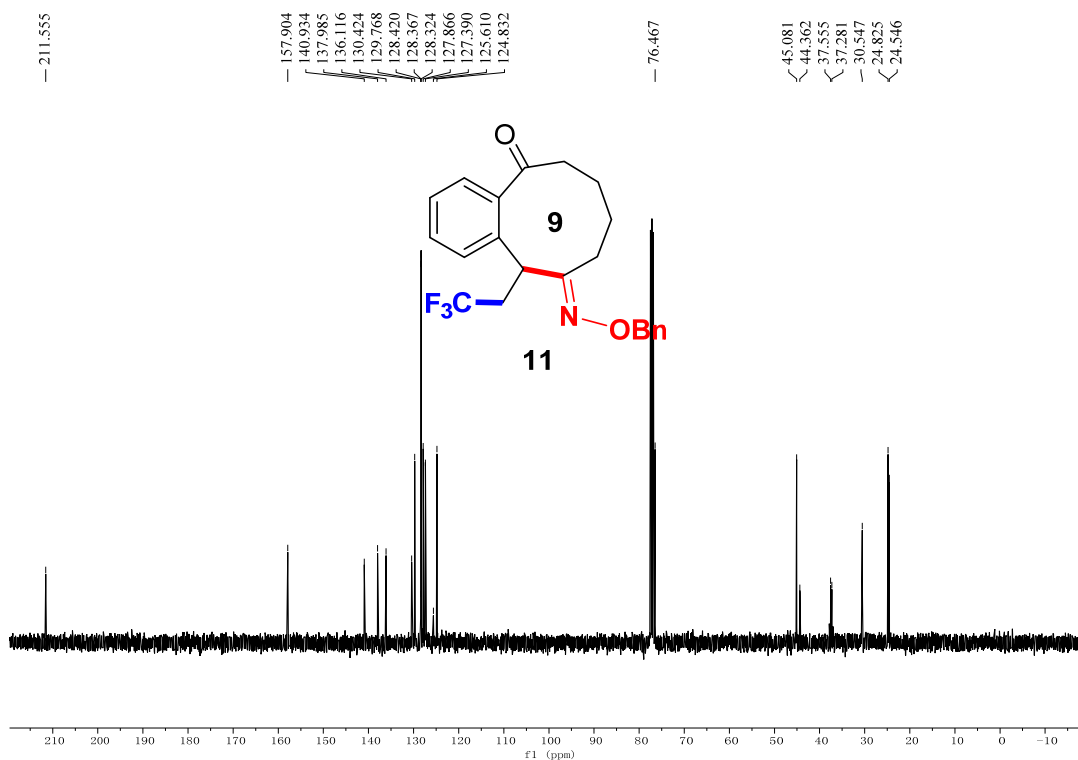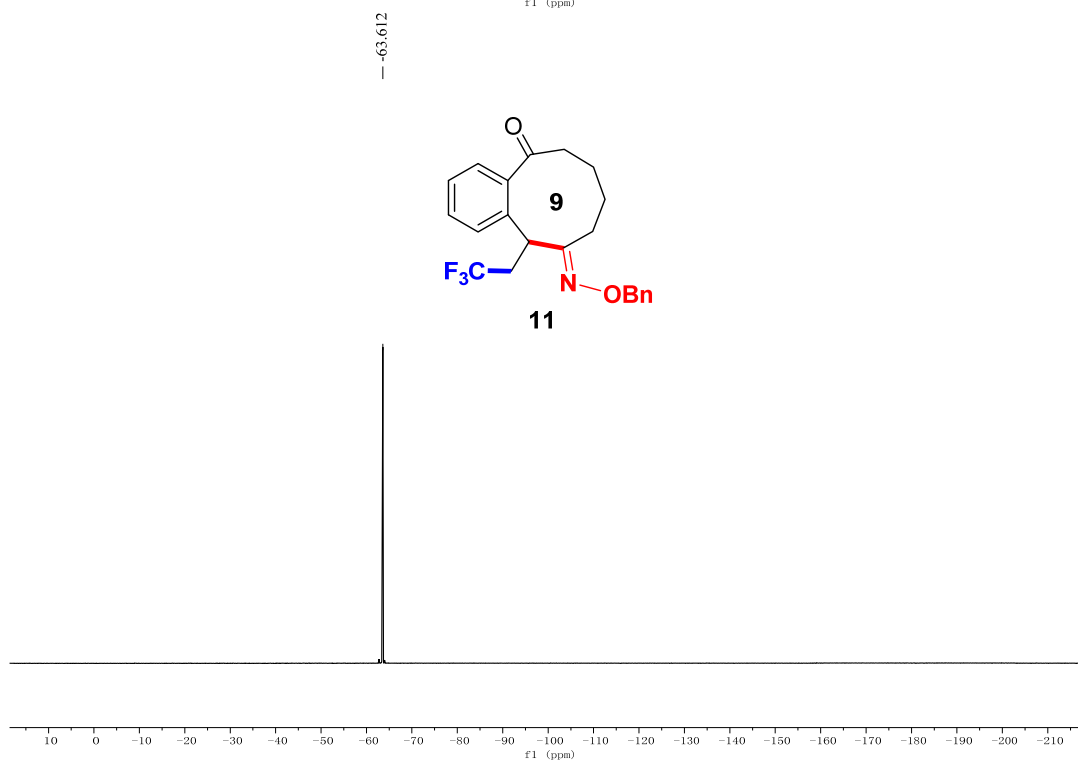

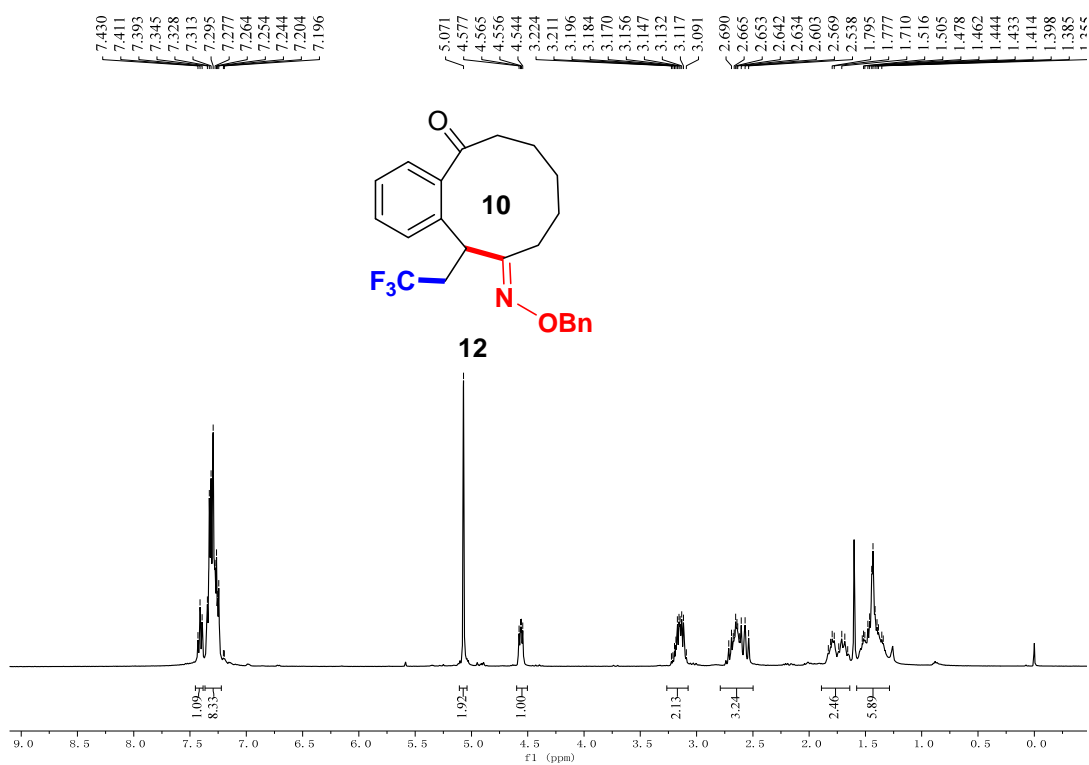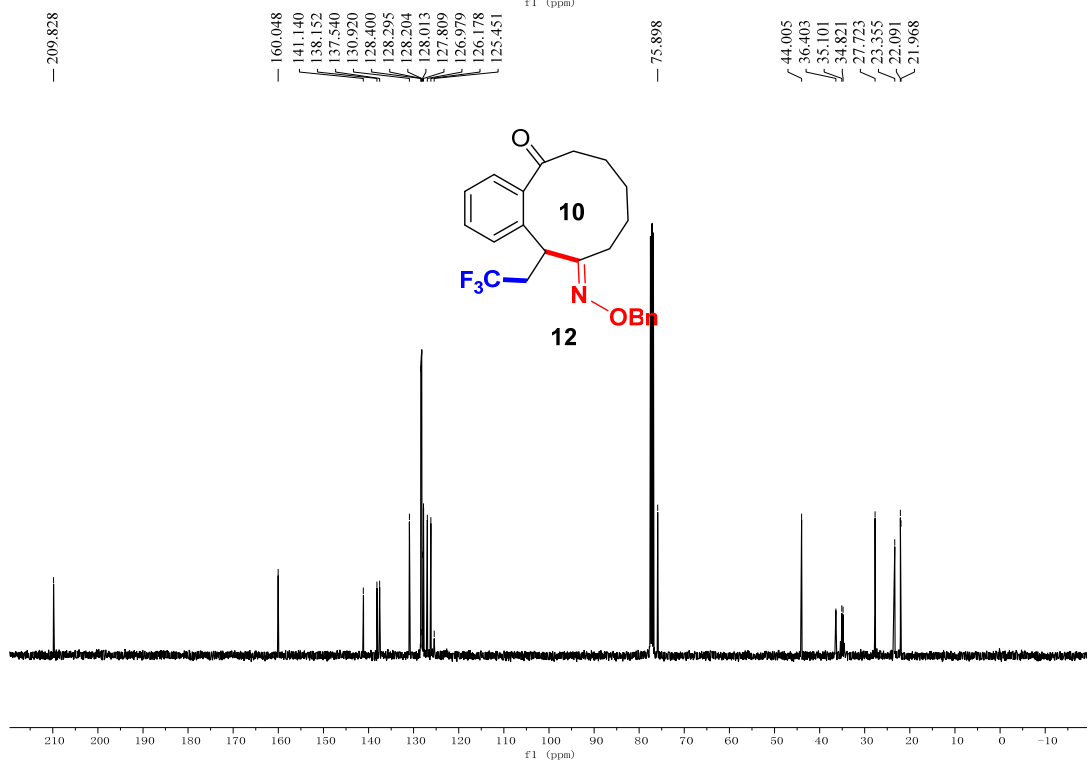

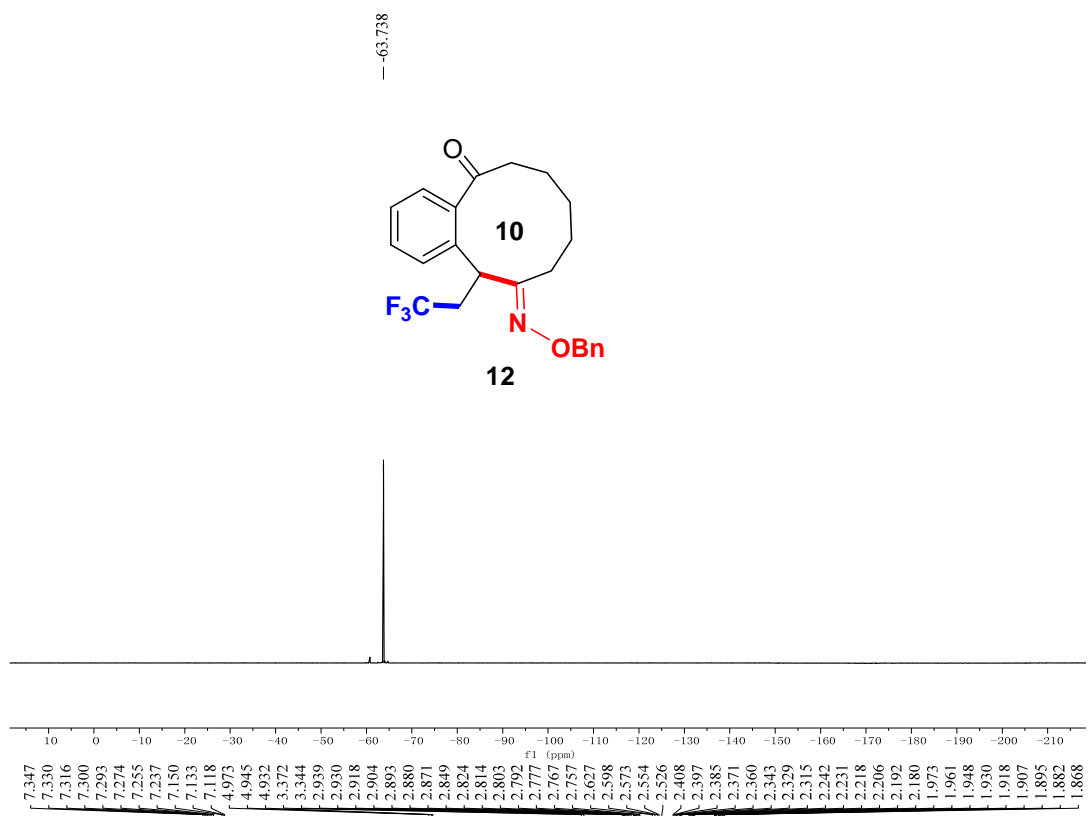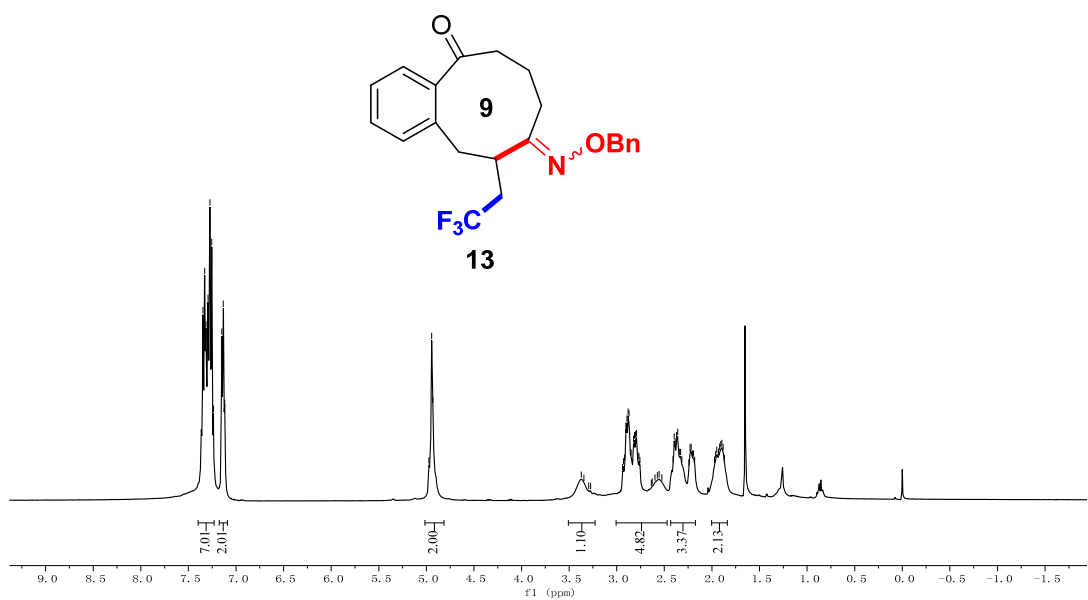

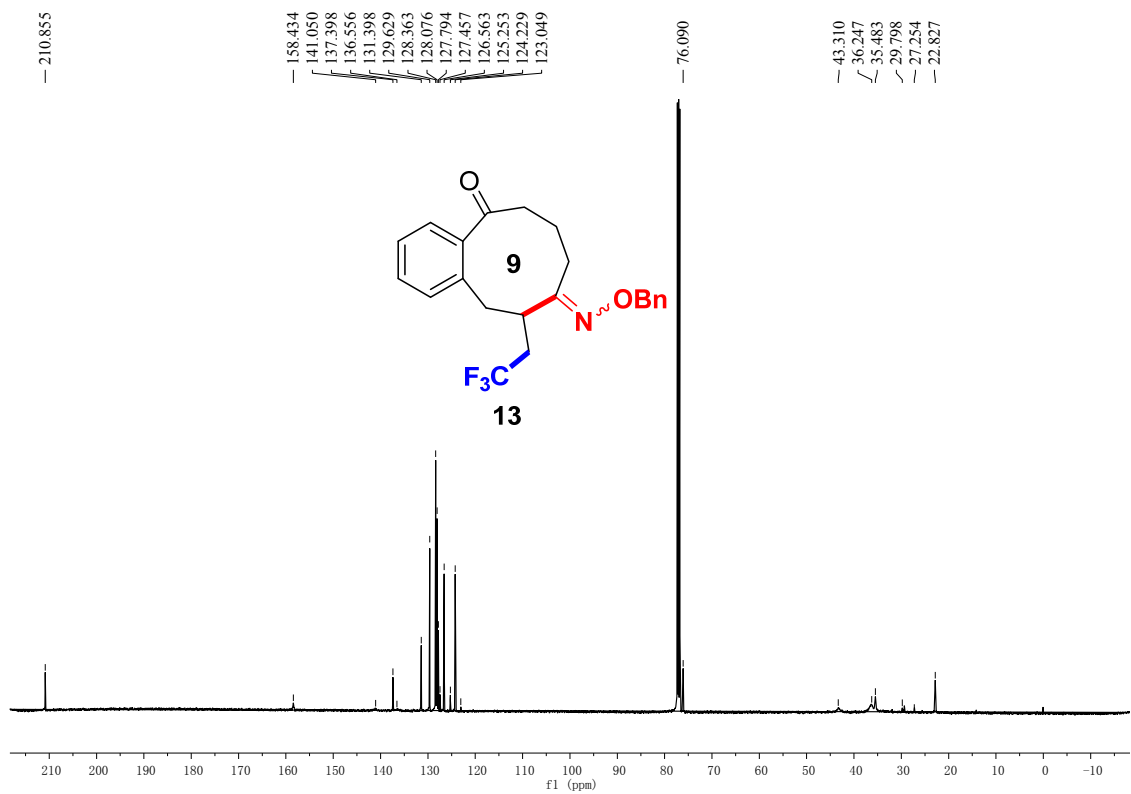

q-8-35-p2.2.fid

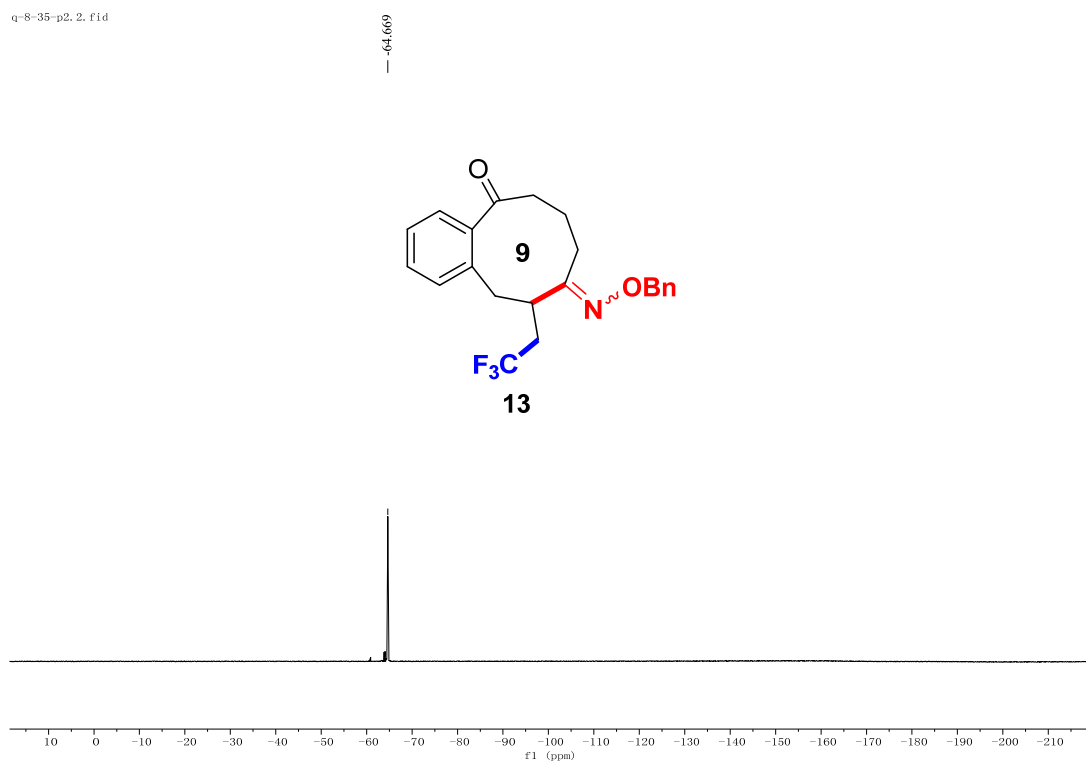

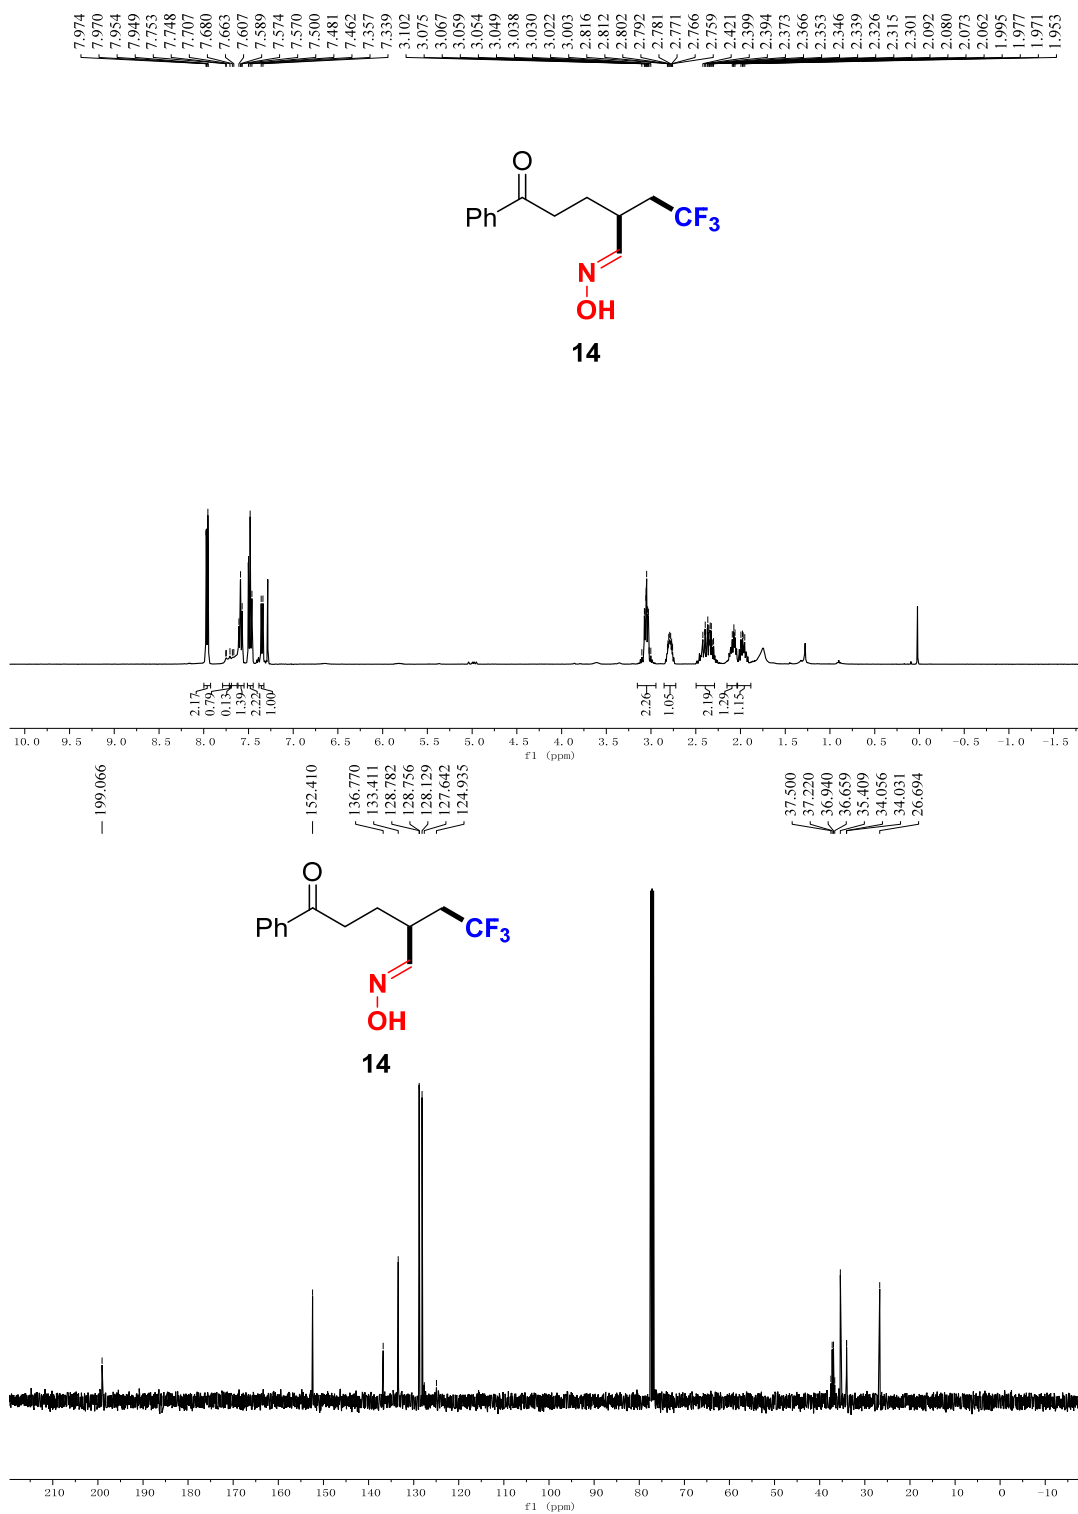

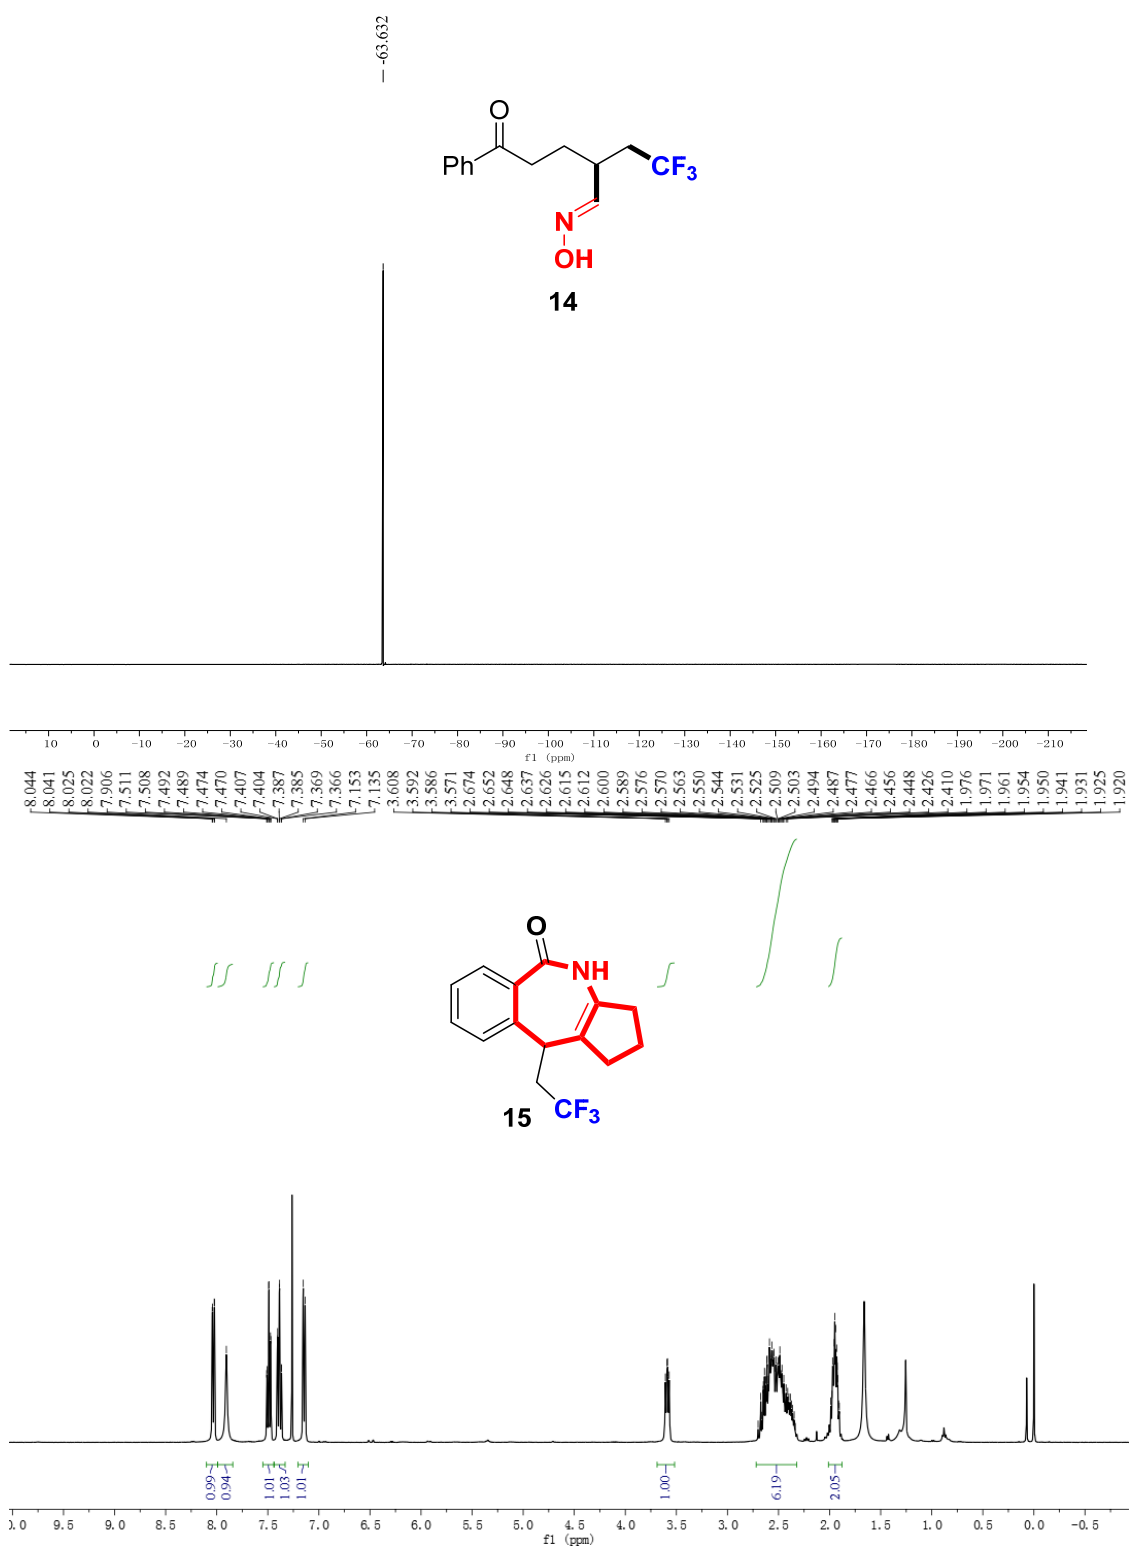

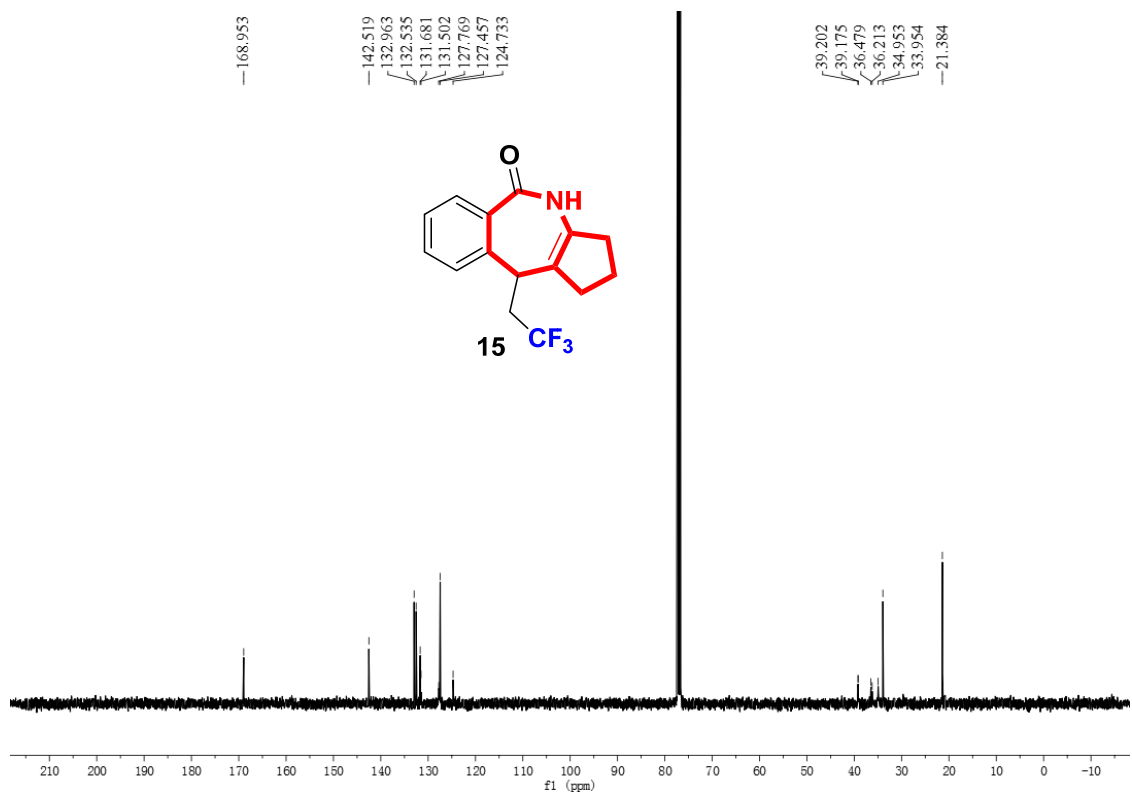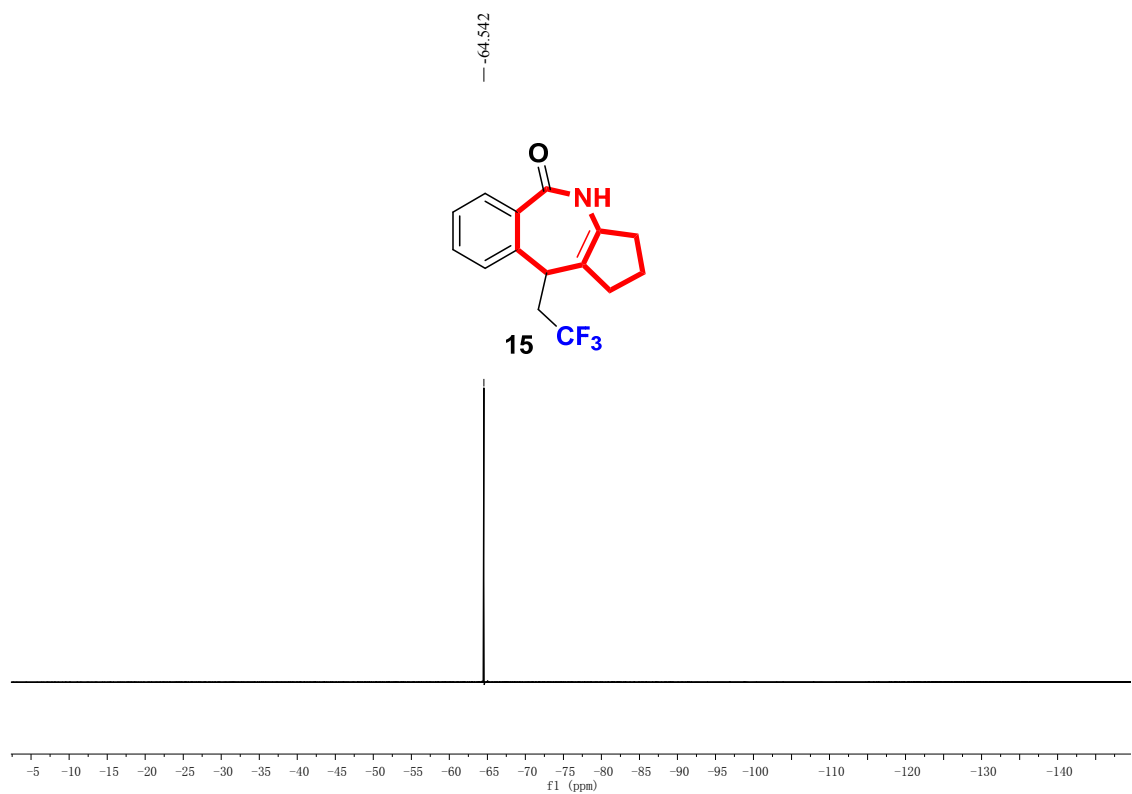

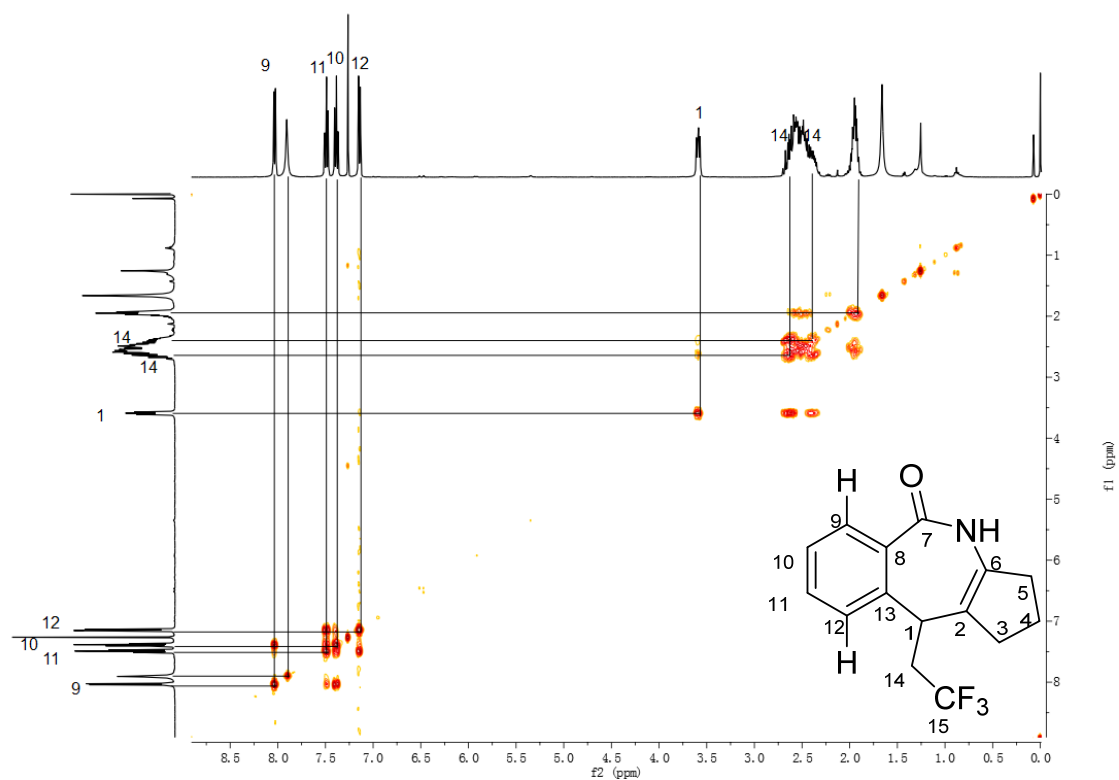

**COSY of compound 15**

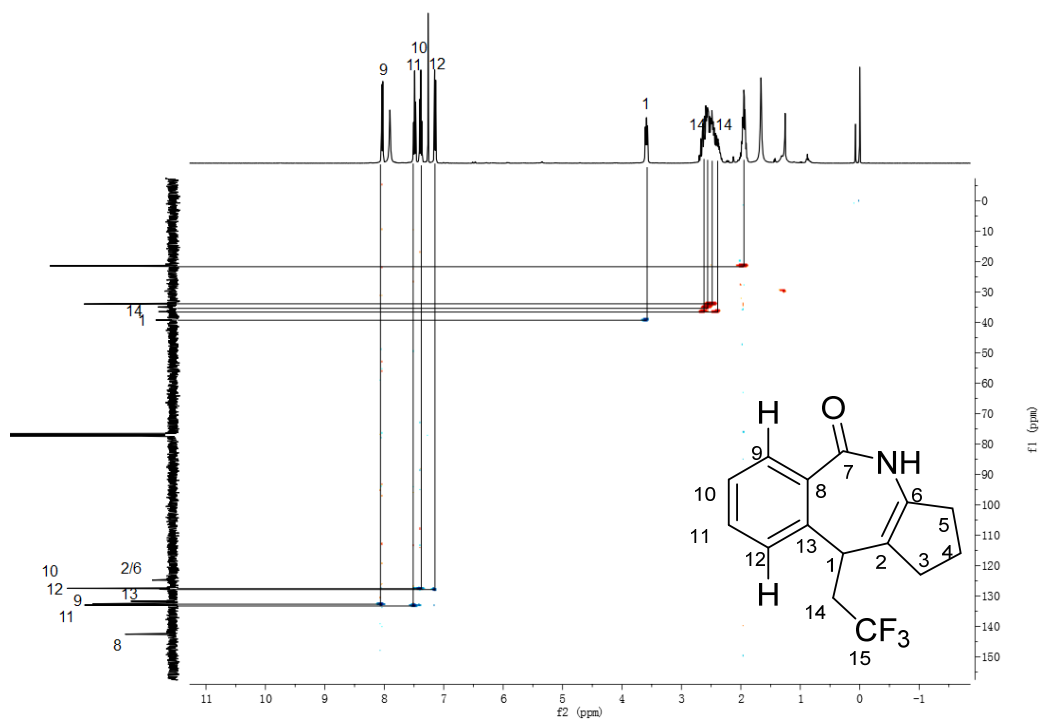

# HSQC of compound 15

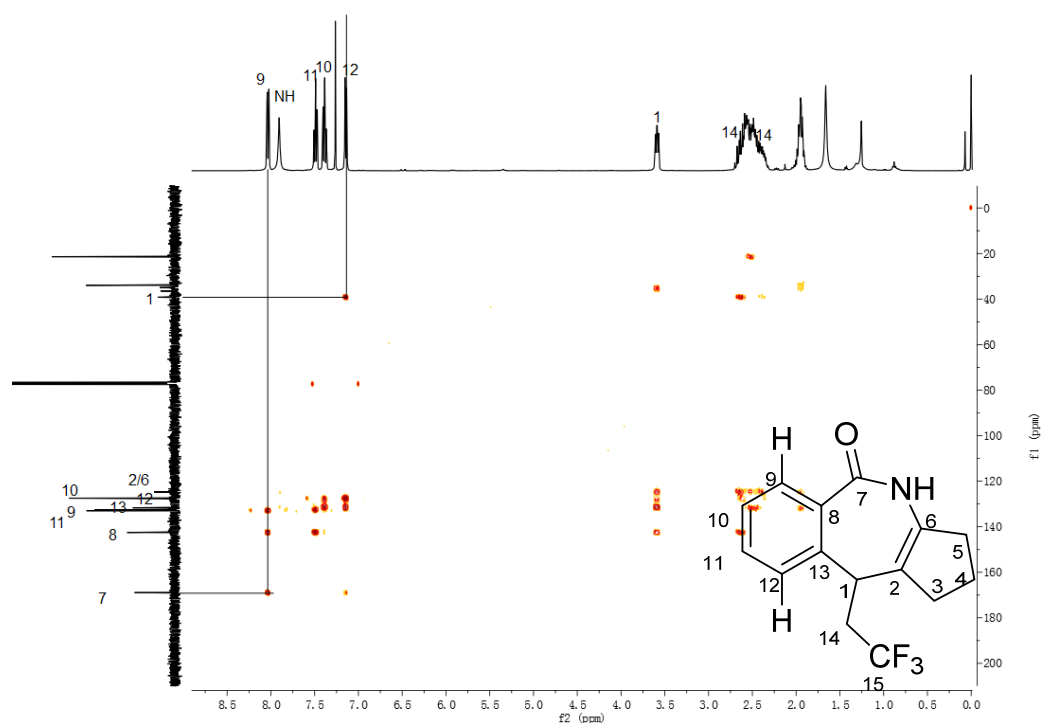

# HMBC of compound 15

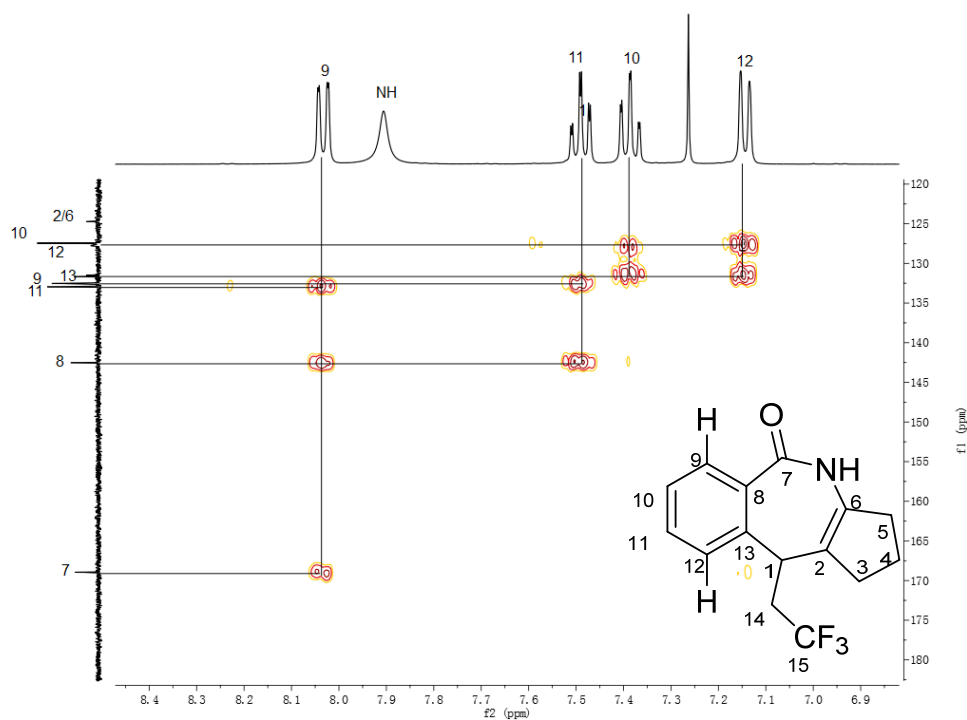

# HMBC of compound 15

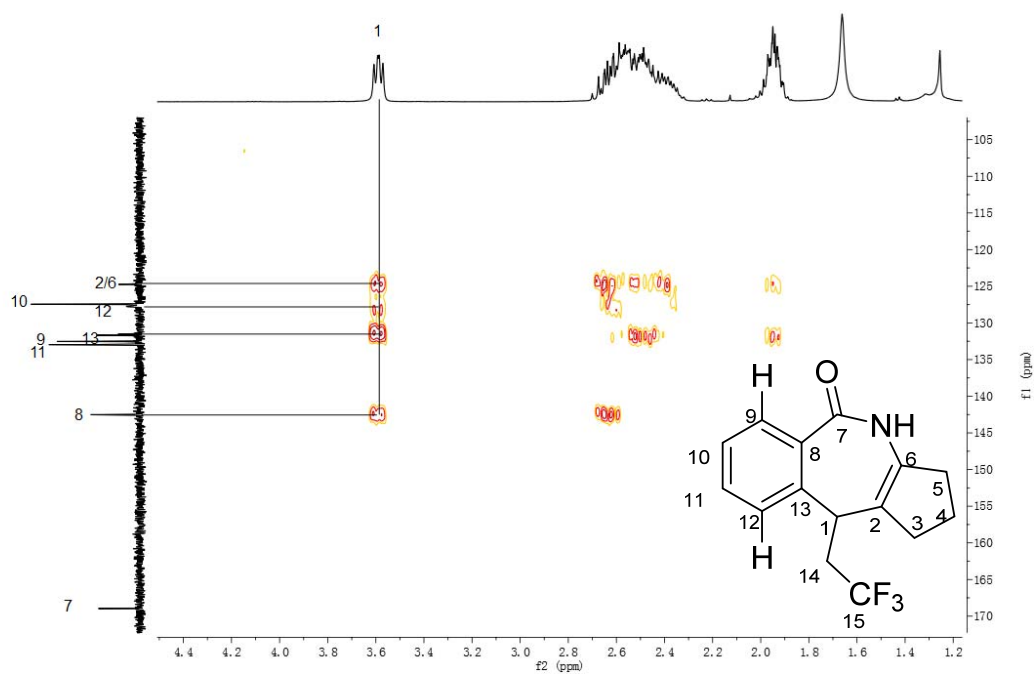

# HMBC of compound 15
